# Supplementary material for: Chemoselective and one-pot synthesis of novel coumarin-based cyclopenta[c]pyrans via base-mediated reaction of α,β-unsaturated coumarins and β-ketodinitriles
Source: Royal Society of Chemistry journal article supplement (doi:10.1039/d2ra00594h), 2022-01-01
Supplement: d2ra00594h1.pdf [file d2ra00594h1.pdf]

# Chemoselective Synthesis of Novel Coumarin-based Cyclopenta[*c*]pyrans *via* Base-mediated Reaction of $\alpha,\beta$ -Unsaturated Coumarins and $\beta$ -Ketodinitriles

Behnaz Farajpour, Abdolali Alizadeh\*

*Department of Chemistry, Tarbiat Modares University, P. O. Box 14115-175, Tehran, Iran*

09/03/2022, ESI first published: 04/03/2022

This version of the Electronic Supplementary Information replaces a previous copy in which the crystallographic details for compound **3d** was incorrect.

## The Table of Contents

|                                                                          |         |
|--------------------------------------------------------------------------|---------|
| Title, author's name, address and Table of contents                      | S1      |
| General procedure for preparation of <b>3a-3k</b>                        | S2      |
| Characteristic data for compounds <b>3a-3k</b>                           | S2-S11  |
| X-ray data and ortep diagram of compound <b>3d</b>                       | S6      |
| IR, <sup>1</sup> H, <sup>13</sup> C NMR and Mass spectra of <b>3a-3k</b> | S12-S45 |

## Experimental section

### General

Keywords: 4-chloro-3-vinyl coumarins, 2-(2-oxo-2-phenylethyl)malononitriles  $\beta$ -ketodinitriles,  $\alpha,\beta$ -unsaturated coumarins, coumarin-based cyclopenta[*c*]pyrans.

\*Corresponding author, Tel.: +98 21 8800663; fax: +98 21 88006544; e-mail: [aalizadeh@modares.ac.ir](mailto:aalizadeh@modares.ac.ir)

Melting points were measured on an Electrothermal 9100 apparatus. IR spectra were recorded as KBr pellets on a Nicolet FTIR 100 spectrophotometer. <sup>1</sup>H NMR (500 MHz, 300 MHz) and <sup>13</sup>C NMR (75 MHz) spectra were obtained using Bruker DRX-500 Avance and Bruker DRX-300 Avance spectrometers. All NMR spectra were recorded at r.t. in DMSO-*d*<sub>6</sub> and CDCl<sub>3</sub>. Chemical shifts are reported in parts per million ( $\delta$ ) downfield from an internal TMS reference. Coupling constants (*J* values) are reported in hertz (Hz), and standard abbreviations were used to indicate spin multiplicities. Elemental analyses for C, H, and N were performed using a Heraeus CHN-O-Rapid analyzer. Mass spectra were recorded on a Finnigan-MATT 8430 mass spectrometer operating at an ionization potential of 70 eV. All chemicals and solvents were purchased from Merck or Aldrich and were used without further purification. Starting materials were synthesized according to the procedures reported in the literature. Single crystals of compounds **3d** were formed in CH<sub>2</sub>Cl<sub>2</sub>.

#### **General procedure for the preparation of 3a-3g.**

To a magnetically stirred solution of phenacyl bromide (1 mmol, 199 mg), and malononitrile (1 mmol, 66 mg), was added Et<sub>3</sub>N (1 mmol, 101 mg) in absolute EtOH (5 ml). After 2 h,  $\alpha,\beta$ -unsaturated coumarin **2** (1 mmol, 310 mg), and Et<sub>3</sub>N (2 mmol) were added to the reaction mixture. The reaction was carried out at 80 °C, and it was monitored by TLC. After 12 h a brilliant orange product was isolated by filtration, and purified by washing with EtOH (96%).

#### **Characteristic data for compounds 3a-3g.**

**6-Oxo-8,10-diphenyl-6H-pyrano[3',4':4,5]cyclopenta[1,2-*c*]chromene-11-carbonitrile (3a).**

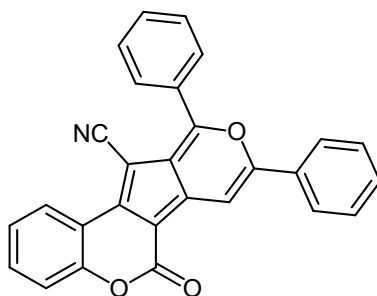

Orange powder, dec point = 310-312 °C, 0.32 g, yield: 79%. IR (KBr): 2201 (C≡N), 1720 (C=O), 1643, 1601, and 1542 (Ar), 1225, 1177, 1114, and 999 (C-O) cm<sup>-1</sup>. Anal. calcd. for C<sub>28</sub>H<sub>15</sub>NO<sub>3</sub> (413.42): C, 81.35; H, 3.66, N, 3.39%. Found: C, 81.34; H, 3.62, N, 3.36%. <sup>1</sup>H NMR (500 MHz, DMSO-*d*<sub>6</sub>): δ = 7.46 (1H, t, <sup>3</sup>J<sub>HH</sub> = 8.5 Hz, CH<sup>2</sup> of coumarin), 7.47 (1H, d, <sup>3</sup>J<sub>HH</sub> = 8.3 Hz, CH<sup>4</sup> of coumarin), 7.63-7.66 (4H, m, 4CH of Ph), 7.77 (2H, t, <sup>3</sup>J<sub>HH</sub> = 7.2 Hz, 2CH<sub>para</sub> of Ph), 7.83 (1H, t, <sup>3</sup>J<sub>HH</sub> = 7.7 Hz, CH<sup>2</sup> of coumarin), 8.15 (2H, t, <sup>3</sup>J<sub>HH</sub> = 7.2 Hz, 2CH<sub>ortho</sub> of Ph), 8.17 (2H, t, <sup>3</sup>J<sub>HH</sub> = 7.2 Hz, 2CH<sub>ortho</sub> of Ph), 8.55 (1H, d, <sup>3</sup>J<sub>HH</sub> = 7.8 Hz, CH<sup>1</sup> of coumarin), 8.62 (1H, s, CH<sup>7</sup>). MS (EI, 70 eV): *m/z* (%) = 414 (M<sup>+</sup>, 100), 384 (12), 356 (24), 327 (24), 251 (22), 206 (18), 105 (13), 77 (16).

**2-Chloro-6-oxo-8,10-diphenyl-6H-pyrano[3',4':4,5]cyclopenta[1,2-c]chromene-11-carbonitrile (3b).**

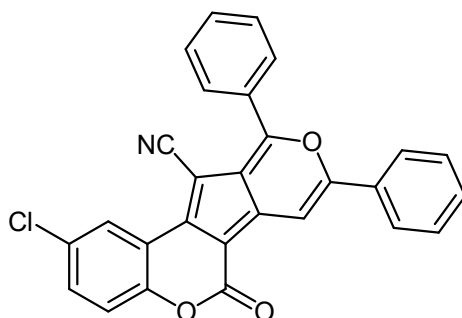

Orange powder, dec point = 318-320 °C, 0.37 g, yield: 84%. IR (KBr): 2202 (C≡N), 1730 (C=O), 1615, 1555, 1541, and 1468 (Ar), 1228, 1176, and 1005 (C-O) cm<sup>-1</sup>. Anal. calcd. for

C<sub>28</sub>H<sub>14</sub>ClNO<sub>3</sub> (447.87): C, 75.09; H, 3.15, N, 3.13%. Found C, 75.07; H, 3.12, N, 3.12%. <sup>1</sup>H NMR (300 MHz, CDCl<sub>3</sub>), δ = 7.35 (1H, d, <sup>3</sup>J<sub>HH</sub> = 8.8 Hz, CH<sup>2</sup> of coumarin), 7.49 (1H, dd, <sup>3</sup>J<sub>HH</sub> = 8.8 Hz, <sup>2</sup>J<sub>HH</sub> = 2.5 Hz, CH<sup>4</sup> of coumarin), 7.56-7.60 (3H, m, 3CH of Ph), 7.73-7.76 (3H, m, 3CH of Ph), 8.07 (2H, t, <sup>3</sup>J<sub>HH</sub> = 6.2 Hz, 2CH<sub>ortho</sub> of Ph), 8.09 (2H, t, <sup>3</sup>J<sub>HH</sub> = 6.2 Hz, 2CH<sub>ortho</sub> of Ph), 8.66 (1H, d, <sup>3</sup>J<sub>HH</sub> = 2.6 Hz, CH<sup>1</sup> of coumarin), 8.74 (1H, s, CH<sup>7</sup>). MS (EI, 70 eV): *m/z* (%) = 447 (M<sup>+</sup>, 100), 427 (3), 390 (6), 327 (13), 251 (9), 105 (11), 77 (14).

**3-Methoxy-6-oxo-8,10-diphenyl-6*H*-pyrano[3',4':4,5]cyclopenta[1,2-*c*]chromene-11-carbonitrile (3c).**

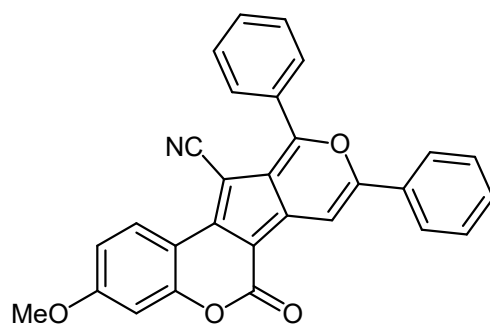

Orange powder, dec point = 343-345 °C, 0.34 g, yield: 77%. IR (KBr): 2198 (C≡N), 1727 (C=O), 1614, 1556, 1460, and 1421 (Ar), 1205, 1166, 1117, and 1035 (C-O) cm<sup>-1</sup>. Anal. calcd. for C<sub>29</sub>H<sub>17</sub>NO<sub>4</sub> (443.45): C, 78.55; H, 3.86, N, 3.16%. Found: C, 78.54; H, 3.85, N, 3.14%. <sup>1</sup>H NMR (500 MHz, CDCl<sub>3</sub>): δ = 3.92 (3H, s, OCH<sub>3</sub>), 6.92 (1H, d, <sup>3</sup>J<sub>HH</sub> = 2.5 Hz, CH<sup>4</sup> of coumarin), 6.95 (1H, dd, <sup>3</sup>J<sub>HH</sub> = 8.5 Hz, <sup>2</sup>J<sub>HH</sub> = 2.5 Hz, CH<sup>2</sup> of coumarin), 7.55-7.60 (3H, m, 3CH of Ph), 7.72-7.75 (3H, m, 3CH of Ph), 8.07 (4H, d, <sup>3</sup>J<sub>HH</sub> = 8.7 Hz 4CH<sub>ortho</sub> of Ph), 8.66 (1H, d, <sup>3</sup>J<sub>HH</sub> = 8.5 Hz, CH<sup>1</sup> of coumarin), 8.74 (1H, s, CH<sup>7</sup>). MS (EI, 70 eV): *m/z* (%) = 443 (M<sup>+</sup>, 100), 400 (20), 372 (10), 314 (18), 221 (23), 105 (38), 77 (24).

**8-(2-Chlorophenyl)-6-oxo-10-phenyl-6H-pyrano[3',4':4,5]cyclopenta[1,2-c]chromene-11-carbonitrile (3d).**

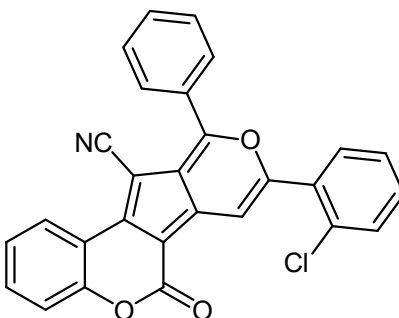

Orange powder, dec point = 255-257 °C, 0.38 g, yield: 86%. IR (KBr): 2204 (C≡N), 1706 (C=O),

1605, 1548, and 1468 (Ar), 1176, 1115, 1045, and 1029 (C-O) cm<sup>-1</sup>. Anal. calcd. for

C<sub>28</sub>H<sub>14</sub>ClNO<sub>3</sub> (447.87): C, 75.09; H, 3.15, N, 3.13%. Found: C, 75.06; H, 3.12, N, 3.12%. <sup>1</sup>H

NMR (500 MHz, DMSO-*d*<sub>6</sub>): δ = 7.42 (1H, t, <sup>3</sup>J<sub>HH</sub> = 7.4 Hz, CH<sup>2</sup> of coumarin), 7.47 (1H, d, <sup>3</sup>J<sub>HH</sub>

= 8.0 Hz, CH<sup>4</sup> of coumarin), 7.59-7.66 (3H, m, 3CH of Ar), 7.70-7.74 (3H, m, 3CH of Ph), 7.78

(1H, t, <sup>3</sup>J<sub>HH</sub> = 7.4 Hz, CH<sup>3</sup> of coumarin), 7.98 (1H, d, <sup>3</sup>J<sub>HH</sub> = 7.0 Hz, CH of Ar), 8.11 (2H, d, <sup>3</sup>J<sub>HH</sub>

= 7.2 Hz, 2CH of Ar), 8.50 (1H, d, <sup>3</sup>J<sub>HH</sub> = 7.8 Hz, CH<sup>1</sup> of coumarin), 8.51 (1H, s, CH<sup>7</sup>). <sup>13</sup>C NMR

(75 MHz, CDCl<sub>3</sub>): δ = 80.76, 111.48, 117.00, 117.70, 117.94, 123.74, 124.72, 125.59, 127.49,

128.86, 129.77, 130.77, 131.01, 131.09, 131.10, 131.47, 131.97, 132.20, 133.07, 139.31, 148.03,

153.31, 155.44, 158.49, 162.77. MS (EI, 70 eV): *m/z* (%) = 447 (M<sup>+</sup>, 7), 308 (13), 251 (11), 139

(100), 105 (46), 77 (34), . Crystal data for 3d C<sub>28</sub>H<sub>14</sub>ClNO<sub>3</sub> (CCDC 1970237): MW = 575.55,

monoclinic, P 1 21/n 1, a = 7.4936(15) Å, b = 24.222(5) Å, c = 13.519(3) Å, α = 90, β =

101.90(3), γ = 90, V = 2401.1(9) Å<sup>3</sup>, Z = 4, D<sub>c</sub> = 1.474 mg/m<sup>3</sup>, F(000) = 1088, crystal

dimension 0.50 × 0.30 × 0.20 mm, radiation, Mo Kα (λ = 0.71073 Å), 2.280 × 2 × 24.499,

intensity data were collected at 293(2) K with a Bruker APEX area-detector diffractometer, and

employing ω/2θ scanning technique, in the range of -8 ≤ h ≤ 8, 0 ≤ k ≤ 28, 0 ≤ l ≤ 15; the

structure was solved by a direct method, all non-hydrogen atoms were positioned and anisotropic

thermal parameters refined from 3827 observed reflections with  $R(\text{int}) = 0.0286$  by a full-matrix least-squares technique converged to  $R1 = 0.0695$ , and  $wR2 = 0.1724$  [ $I > 2\sigma(I)$ ].

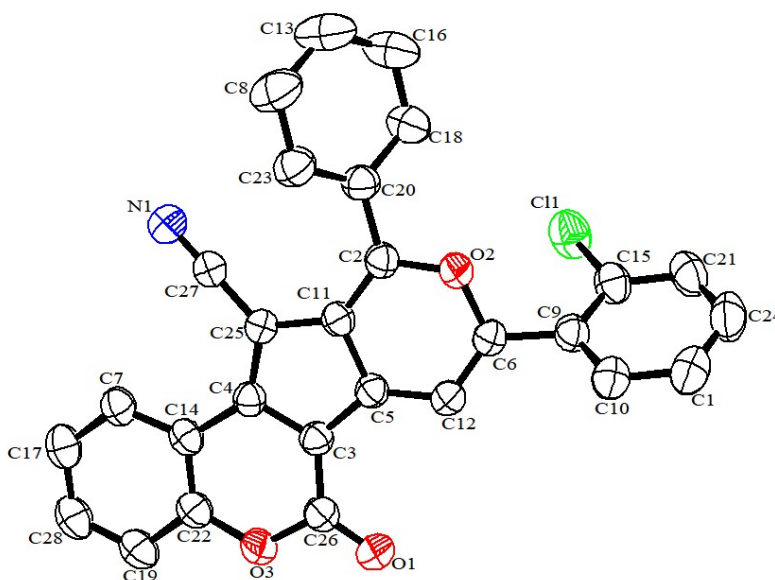

ORTEP diagram of **3d** (CCDC 1970237).

**6-Oxo-8-phenyl-10-(*p*-tolyl)-6*H*-pyrano[3',4':4,5]cyclopenta[1,2-*c*]chromene-11-carbonitrile (**3e**).**

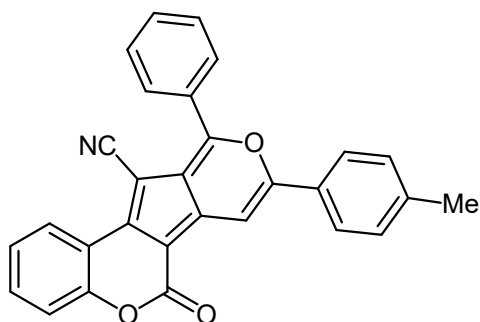

Orange powder, dec point = 342-345 °C, 0.32 g, yield: 75%. IR (KBr): 2198 (C≡N), 1730 (C=O), 1605, 1560, 1543, and 1511 (Ar), 1176, 1112, 1052, and 1036 (C-O)  $\text{cm}^{-1}$ . Anal. calcd. for  $\text{C}_{29}\text{H}_{17}\text{NO}_3$  (427.45): C, 81.49; H, 4.01, N, 3.28%. Found: C, 81.44; H, 4.02, N, 3.26%.  $^1\text{H}$  NMR (300 MHz,  $\text{DMSO-}d_6$ ):  $\delta = 2.41$  (3H, s,  $\text{CH}_3$ ), 7.44 (2H, d,  $^3J_{\text{HH}} = 8.0$  Hz, 2CH of Ar), 7.45 (1H,

t,  $^3J_{\text{HH}} = 7.8$  Hz, CH<sup>2</sup> of coumarin), 7.49 (1H, d,  $^3J_{\text{HH}} = 7.8$  Hz, CH<sup>4</sup> of coumarin), 7.67 (1H, t,  $^3J_{\text{HH}} = 7.4$  Hz, CH<sup>3</sup> of coumarin), 7.74 (1H, t,  $^3J_{\text{HH}} = 8.5$  Hz, CH<sub>para</sub> of Ph), 7.77 (2H, t,  $^3J_{\text{HH}} = 8.5$  Hz, 2CH<sub>meta</sub> of Ph), 8.05 (2H, d,  $^3J_{\text{HH}} = 8.0$  Hz, 2CH of Ar), 8.15 (2H, d,  $^3J_{\text{HH}} = 8.4$  Hz, 2CH<sub>ortho</sub> of Ph), 8.58 (1H, d,  $^3J_{\text{HH}} = 7.7$  Hz, CH<sup>1</sup> of coumarin), 8.62 (1H, s, CH<sup>7</sup>). MS (EI, 70 eV): *m/z* (%) = 427 (M<sup>+</sup>, 100), 370 (6), 354 (8), 340 (10), 327 (14), 264 (12), 105 (55), 77 (21).

**8-(4-Nitrophenyl)-6-oxo-10-phenyl-6H-pyrano[3',4':4,5]cyclopenta[1,2-c]chromene-11-carbonitrile (3f).**

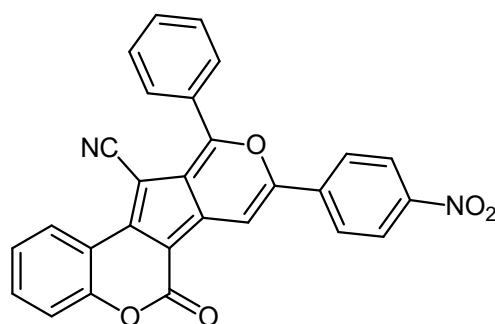

Orange powder, dec point = 367-369 °C, 0.41 g, yield: 91%. IR (KBr): 2204 (C≡N), 1720 (C=O), 1594, 1542, 1521, and 1424 (Ar), 1175, 1111, 1051, and 1000 (C-O) cm<sup>-1</sup>. Anal. calcd. for C<sub>28</sub>H<sub>14</sub>N<sub>2</sub>O<sub>5</sub> (458.09): C, 73.36; H, 3.08, N, 6.11%. Found: C, 73.34; H, 3.10, N, 6.13%. <sup>1</sup>H NMR (500 MHz, DMSO-*d*<sub>6</sub>): δ = 7.43 (1H, t,  $^3J_{\text{HH}} = 8.4$  Hz, CH<sup>2</sup> of coumarin), 7.46 (1H, d,  $^3J_{\text{HH}} = 8.6$  Hz, CH<sup>4</sup> of coumarin), 7.63 (1H, t,  $^3J_{\text{HH}} = 8.0$  Hz, CH<sup>3</sup> of coumarin), 7.76 (2H, t,  $^3J_{\text{HH}} = 7.6$  Hz, 2CH<sub>meta</sub> of Ph), 7.82 (1H, t,  $^3J_{\text{HH}} = 7.4$  Hz, CH<sub>para</sub> of Ph), 8.17 (2H, d,  $^3J_{\text{HH}} = 7.6$  Hz, 2CH<sub>ortho</sub> of Ph), 8.38 (2H, d,  $^3J_{\text{HH}} = 8.6$  Hz, 2CH of Ar), 8.41 (2H, d,  $^3J_{\text{HH}} = 8.6$  Hz, 2CH of Ar), 8.55 (1H, d,  $^3J_{\text{HH}} = 7.9$  Hz, CH<sup>1</sup> of coumarin), 8.80 (1H, s, CH<sup>7</sup>). MS (EI, 70 eV): *m/z* (%) = 458 (M<sup>+</sup>, 100), 412 (23), 354 (30), 327 (62), 251 (28), 105 (71), 77 (46).

**6-Oxo-8,10-di-*p*-tolyl-6H-pyrano[3',4':4,5]cyclopenta[1,2-c]chromene-11-carbonitrile (3g).**

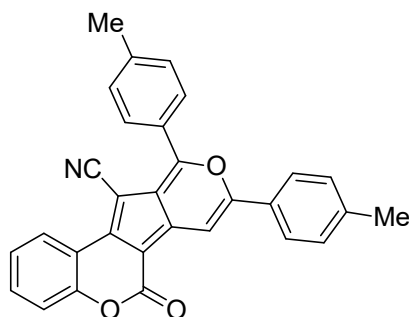

Orange powder, dec point = 348-350 °C, 0.31 g, yield: 72%. IR (KBr): 2198 (C≡N), 1730 (C=O), 1604, 1563, 1484, and 1422 (Ar), 1175, 1112, 1051, and 998 (C-O) cm<sup>-1</sup>. Anal. calcd. for C<sub>30</sub>H<sub>19</sub>NO<sub>3</sub> (441.14): C, 81.62; H, 4.34, N, 3.17%. Found: C, 81.63; H, 4.36, N, 3.15%. <sup>1</sup>H NMR (500 MHz, DMSO-*d*<sub>6</sub>): δ = 2.47 (3H, s, CH<sub>3</sub>), 2.55 (3H, s, CH<sub>3</sub>), 7.37 (2H, d, <sup>3</sup>J<sub>HH</sub> = 7.7 Hz, 2CH of Ar), 7.38 (1H, t, <sup>3</sup>J<sub>HH</sub> = 7.2 Hz, CH<sup>2</sup> of coumarin), 7.43 (1H, d, <sup>3</sup>J<sub>HH</sub> = 8.2 Hz, CH<sup>4</sup> of coumarin), 7.53 (2H, d, <sup>3</sup>J<sub>HH</sub> = 7.7 Hz, 2CH of Ar), 7.56 (1H, t, <sup>3</sup>J<sub>HH</sub> = 7.7 Hz, CH<sup>3</sup> of coumarin), 7.96 (2H, d, <sup>3</sup>J<sub>HH</sub> = 7.8 Hz, 2CH of Ar), 7.99 (2H, d, <sup>3</sup>J<sub>HH</sub> = 7.9 Hz, 2CH of Ar), 8.72 (1H, s, CH<sup>7</sup>), 8.77 (1H, d, <sup>3</sup>J<sub>HH</sub> = 7.9 Hz, CH<sup>1</sup> of coumarin). MS (EI, 70 eV): *m/z* (%) = 441 (M<sup>+</sup>, 100), 354 (16), 264 (19), 220 (29), 119 (25), 91 (57).

**10-(4-Bromophenyl)-6-oxo-8-phenyl-6H-pyrano[3',4':4,5]cyclopenta[1,2-c]chromene-11-carbonitrile (3h).**

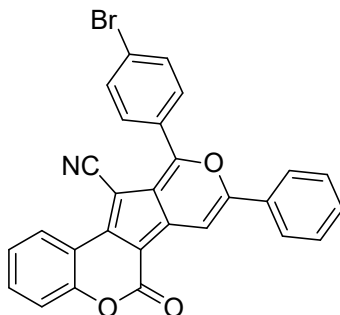

Orange powder, dec point = 357-359 °C, 0.40 g, yield: 83%. IR (KBr): 2204 (C≡N), 1729 (C=O), 1602, 1563, 1541, and 1425 (Ar), 1175, 1113, 1051, and 1005 (C-O) cm<sup>-1</sup>. Anal. calcd. for



C<sub>28</sub>H<sub>14</sub>BrNO<sub>3</sub> (491.02): C, 68.31; H, 2.87, N, 2.85%. Found: C, 68.33; H, 2.85, N, 2.86%. <sup>1</sup>H NMR (500 MHz, DMSO-*d*<sub>6</sub>): δ = 7.48 (1H, t, <sup>3</sup>J<sub>HH</sub> = 8.2 Hz, CH<sup>2</sup> of coumarin), 7.49 (1H, d, <sup>3</sup>J<sub>HH</sub> = 8.4 Hz, CH<sup>4</sup> of coumarin), 7.63 (2H, d, <sup>3</sup>J<sub>HH</sub> = 7.0 Hz, 2CH of Ar), 7.64 (1H, t, <sup>3</sup>J<sub>HH</sub> = 8.2 Hz, CH<sub>para</sub> of Ph), 7.67 (1H, t, 7.2 Hz, CH<sup>3</sup> of coumarin), 7.98 (2H, d, <sup>3</sup>J<sub>HH</sub> = 8.2 Hz, 2CH<sub>meta</sub> of Ph), 8.11 (2H, d, <sup>3</sup>J<sub>HH</sub> = 8.2 Hz, 2CH<sub>ortho</sub> of Ph), 8.16 (2H, d, <sup>3</sup>J<sub>HH</sub> = 7.0 Hz, 2CH of Ar), 8.56 (1H, d, <sup>3</sup>J<sub>HH</sub> = 7.0 Hz, CH<sup>1</sup> of coumarin), 8.66 (1H, s, CH<sup>7</sup>). MS (EI, 70 eV): *m/z* (%) = 493 (M<sup>+</sup>+1, 100), 491 (M<sup>+</sup>, 98), 327 (26), 251 (30), 105 (27), 77 (41).

**10-(4-Chlorophenyl)-6-oxo-8-phenyl-6H-pyrano[3',4':4,5]cyclopenta[1,2-*c*]chromene-11-carbonitrile (3i).**

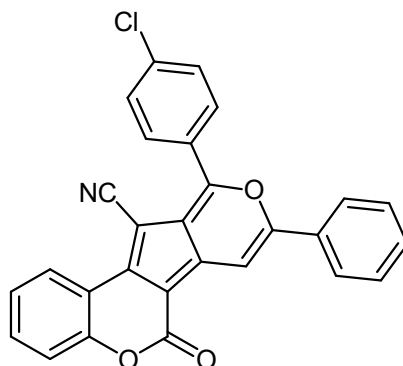

Orange powder, dec point = 370-373 °C, 0.36 g, yield: 81%. IR (KBr): 2200 (C≡N), 1729 (C=O), 1602, 1563, 1468, and 1423 (Ar), 1225, 1175, 1112, and 1051 (C-O) cm<sup>-1</sup>. Anal. calcd. for C<sub>28</sub>H<sub>14</sub>ClNO<sub>3</sub> (447.87): C, 75.09; H, 3.15, N, 3.13%. Found: C, 75.06; H, 3.13, N, 3.12%. <sup>1</sup>H NMR (500 MHz, CDCl<sub>3</sub>): δ = 7.42 (1H, t, <sup>3</sup>J<sub>HH</sub> = 7.3 Hz, CH<sup>2</sup> of coumarin), 7.46 (1H, d, <sup>3</sup>J<sub>HH</sub> = 8.2 Hz, CH<sup>4</sup> of coumarin), 7.50-7.64 (4H, m, 2CH<sub>meta</sub> of Ph, CH<sub>para</sub> of Ph, and CH<sup>3</sup> of coumarin), 7.74 (2H, d, <sup>3</sup>J<sub>HH</sub> = 8.5 Hz, 2CH of Ar), 8.06 (2H, d, <sup>3</sup>J<sub>HH</sub> = 8.5 Hz, 2CH of Ar), 8.09 (2H, d, <sup>3</sup>J<sub>HH</sub> = 8.0 Hz, 2CH<sub>meta</sub> of Ph), 8.78 (1H, d, <sup>3</sup>J<sub>HH</sub> = 7.9 Hz, CH<sup>1</sup> of coumarin), 8.81 (1H, s, CH<sup>7</sup>). MS (EI, 70 eV): *m/z* (%) = 447 (M<sup>+</sup>, 2), 327 (10), 308 (9), 251 (18), 138 (100), 105 (31), 77 (28).

**8-(4-Methoxyphenyl)-6-oxo-10-phenyl-6H-pyrano[3',4':4,5]cyclopenta[1,2-*c*]chromene-11-carbonitrile (3j).**

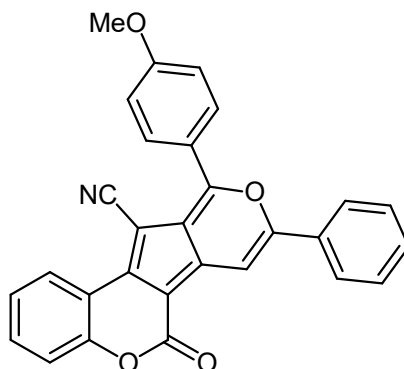

Orange powder, dec point = 318-320 °C, 0.35 g, yield: 80%. IR (KBr): 2198 (C≡N), 1735 (C=O), 1603, 1559, 1547, and 1470 (Ar), 1000 (C-O) cm<sup>-1</sup>. Anal. calcd. for C<sub>29</sub>H<sub>17</sub>NO<sub>4</sub> (443.45): C, 78.55; H, 3.86, N, 3.16%. Found: C, 78.54; H, 3.84, N, 3.15%. <sup>1</sup>H NMR (500 MHz, DMSO-*d*<sub>6</sub>): δ = 3.95 (3H, s, OCH<sub>3</sub>), 7.28 (2H, d, <sup>3</sup>J<sub>HH</sub> = 8.7 Hz, 2CH of Ar), 7.40 (1H, t, <sup>3</sup>J<sub>HH</sub> = 7.1 Hz, CH<sup>4</sup> of coumarin), 7.41 (1H, d, <sup>3</sup>J<sub>HH</sub> = 7.1 Hz, CH<sup>2</sup> of coumarin), 7.50-7.60 (3H, m, 3CH of Ph), 7.60 (1H, t, <sup>3</sup>J<sub>HH</sub> = 6.8 Hz, CH<sup>3</sup> of coumarin), 8.07 (2H, d, <sup>3</sup>J<sub>HH</sub> = 7.3 Hz, 2CH<sub>ortho</sub> of Ph), 8.11 (2H, d, <sup>3</sup>J<sub>HH</sub> = 8.6 Hz, 2CH of Ar), 8.48 (1H, s, CH<sup>7</sup>), 8.51 (1H, d, <sup>3</sup>J<sub>HH</sub> = 7.0 Hz, CH<sup>1</sup> of coumarin). MS (EI, 70 eV: *m/z* (%) = 443 (M<sup>+</sup>, 100), 428 (2), 372 (7), 344 (7), 314 (9), 221 (16), 105 (20), 77 (13).

**6-Oxo-8-phenyl-10-(*p*-tolyl)-6H-pyrano[3',4':4,5]cyclopenta[1,2-*c*]chromene-11-carbonitrile (3k).**

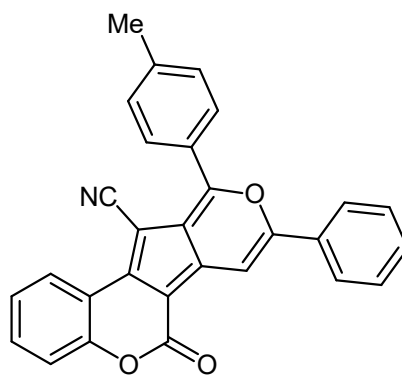

Orange powder, dec point = 301-305 °C, 0.33 g, yield: 78%. IR (KBr): 2181 (C≡N), 1680 (C=O), 1652, 1616, 1598, and 1486 (Ar), 1218, 1201, 1169, and 1105 (C-O) cm<sup>-1</sup>. Anal. calcd. for C<sub>29</sub>H<sub>17</sub>NO<sub>3</sub> (427.12): C, 81.49; H, 4.01, N, 3.28%. Found: C, 81.51; H, 4.02, N, 3.28%. <sup>1</sup>H NMR (500 MHz, DMSO-*d*<sub>6</sub>): δ = 2.56 (3H, s, CH<sub>3</sub>), 7.38 (1H, t, <sup>3</sup>J<sub>HH</sub> = 7.6 Hz, CH<sup>2</sup> of coumarin), 7.43 (1H, d, <sup>3</sup>J<sub>HH</sub> = 8.3 Hz, CH<sup>2</sup> of coumarin), 7.52-7.60 (6H, m, 6CH of Ar), 8.00 (2H, d, <sup>3</sup>J<sub>HH</sub> = 7.7 Hz, 2CH<sub>ortho</sub> of Ph), 8.07 (2H, d, <sup>3</sup>J<sub>HH</sub> = 7.5 Hz, 2CH of Ar), 8.77 (1H, s, CH<sup>7</sup>), 8.78 (1H, d, <sup>3</sup>J<sub>HH</sub> = 7.9 Hz, CH<sup>1</sup> of coumarin). MS (EI, 70 eV: *m/z* (%) = 427 (M<sup>+</sup>, 100), 370 (4), 340 (5), 327 (4), 213 (9).

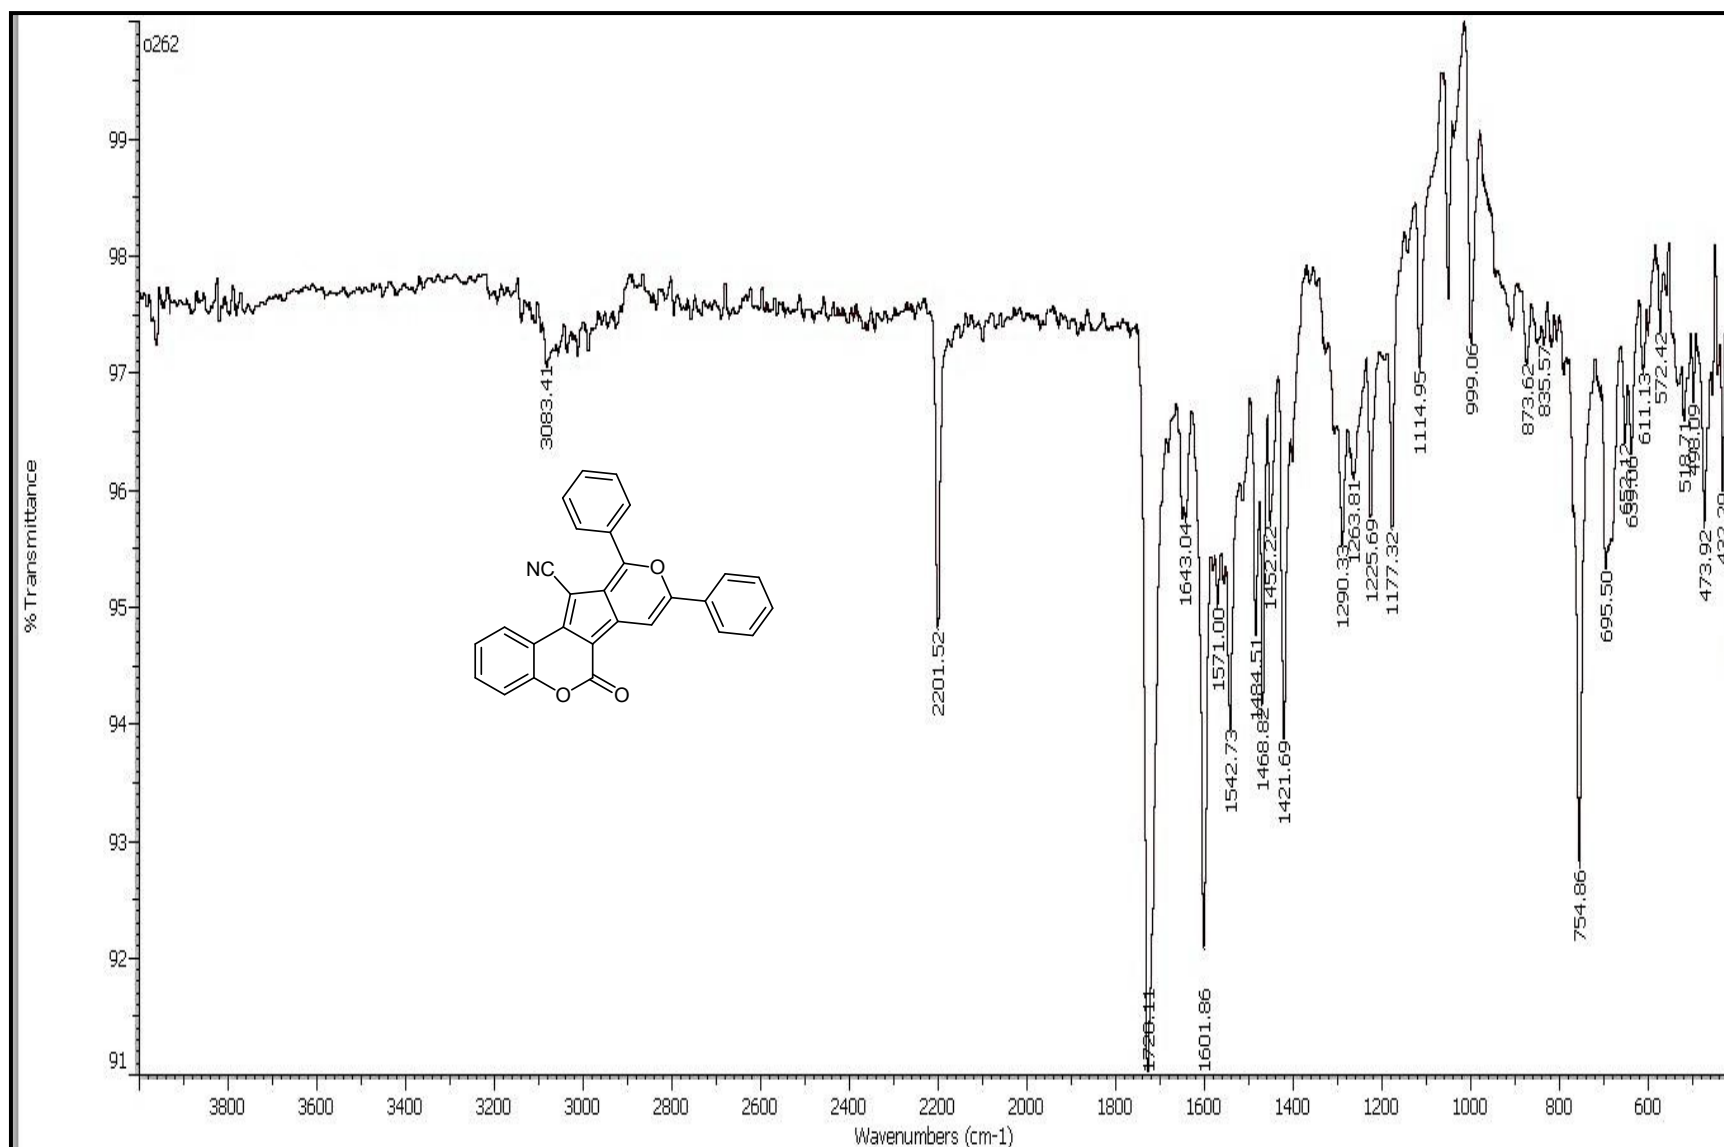

IR spectrum of 3a

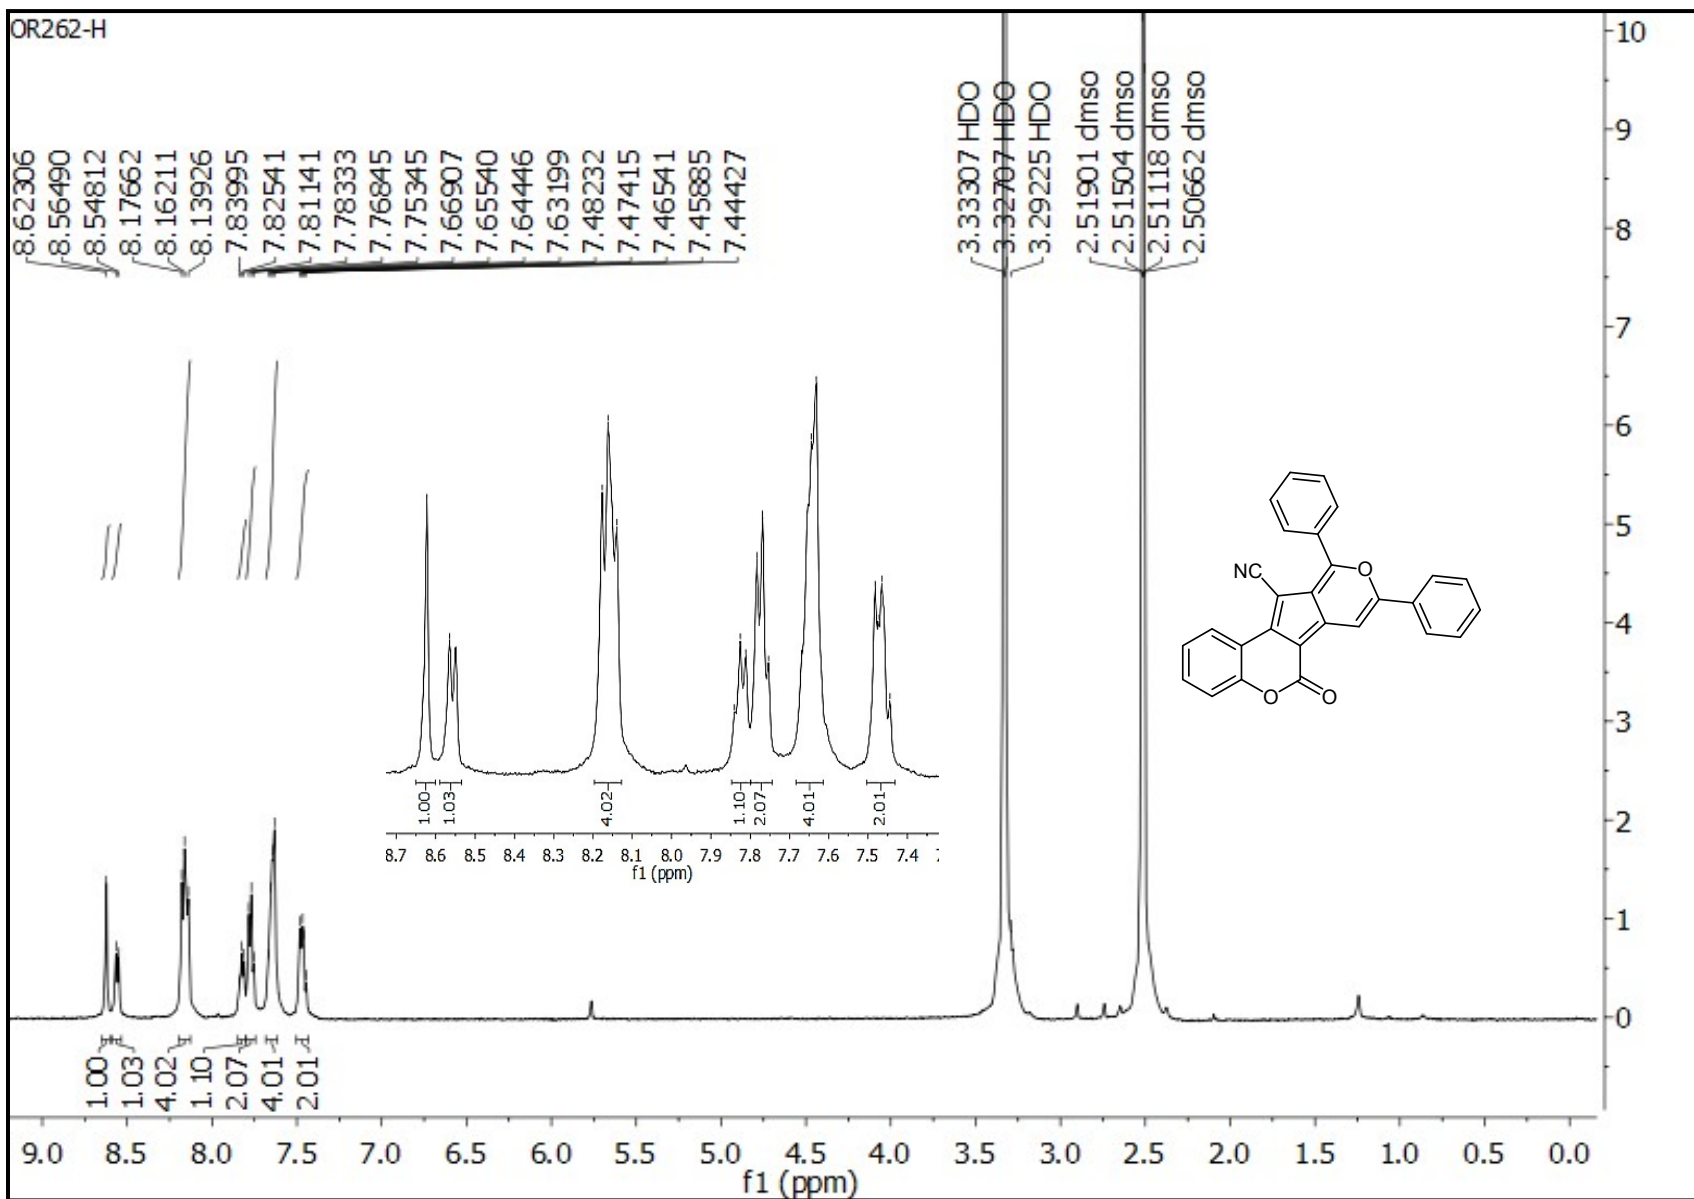

<sup>1</sup>H NMR (DMSO-*d*<sub>6</sub>, 500 MHz) of **3a**

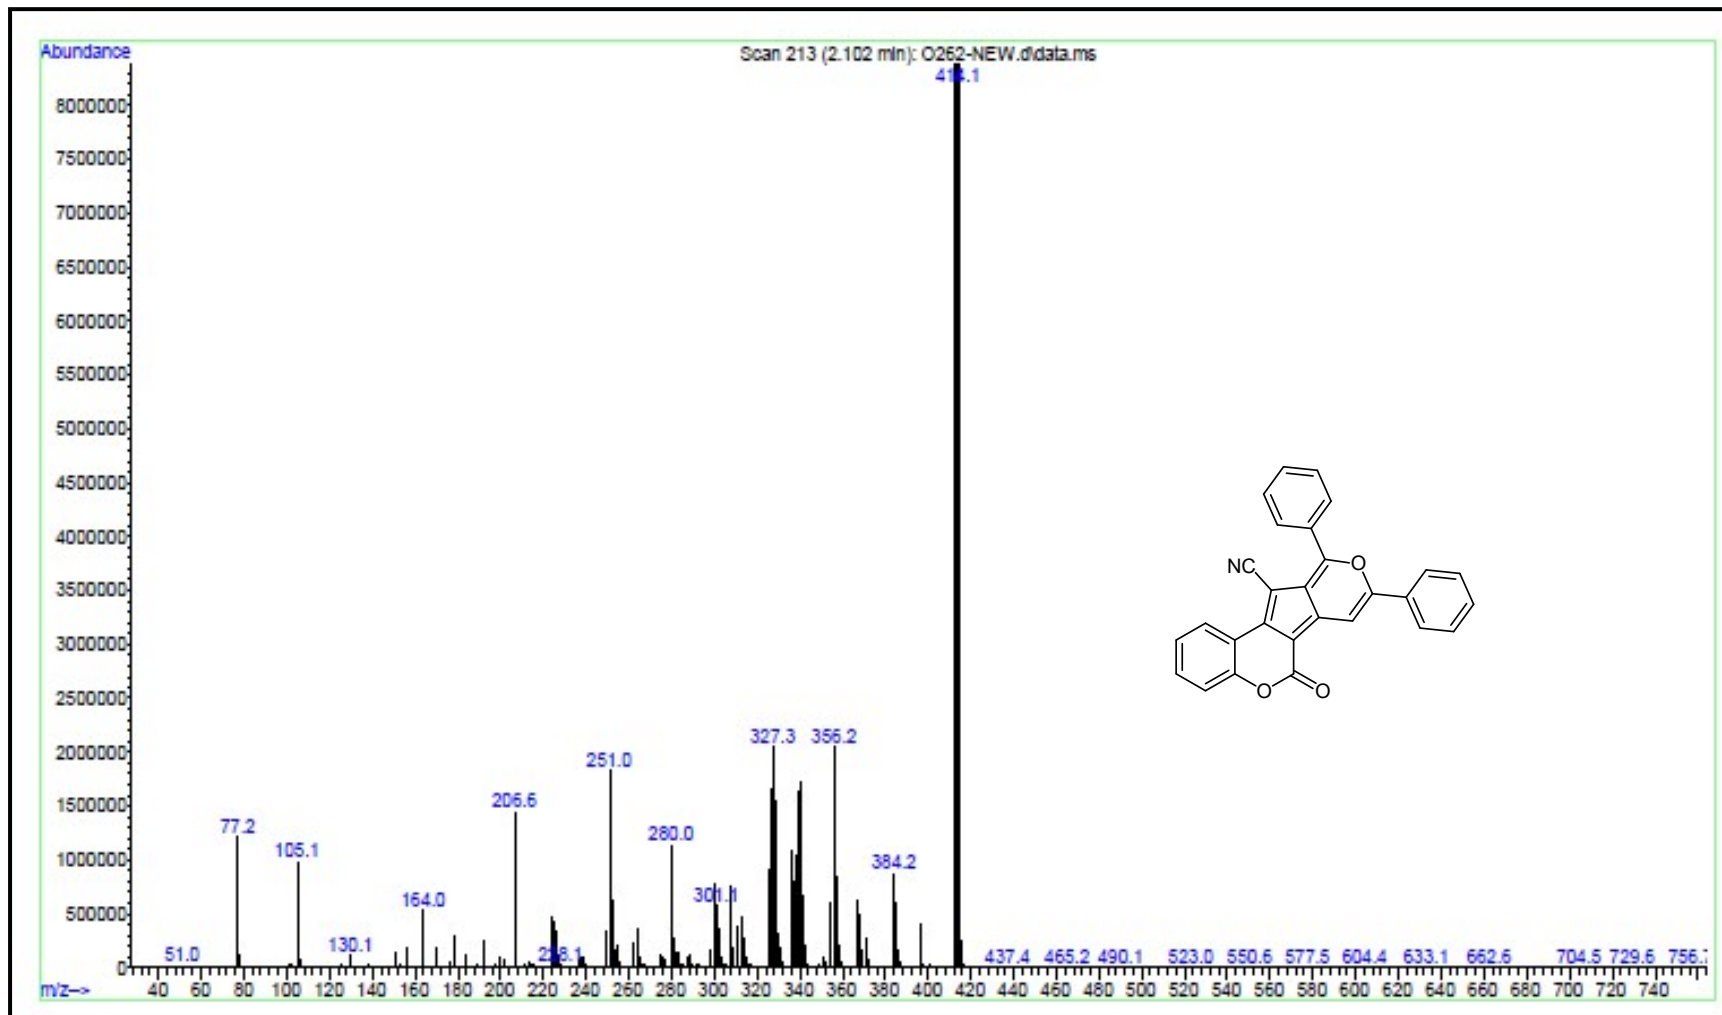

Mass spectrum of **3a**

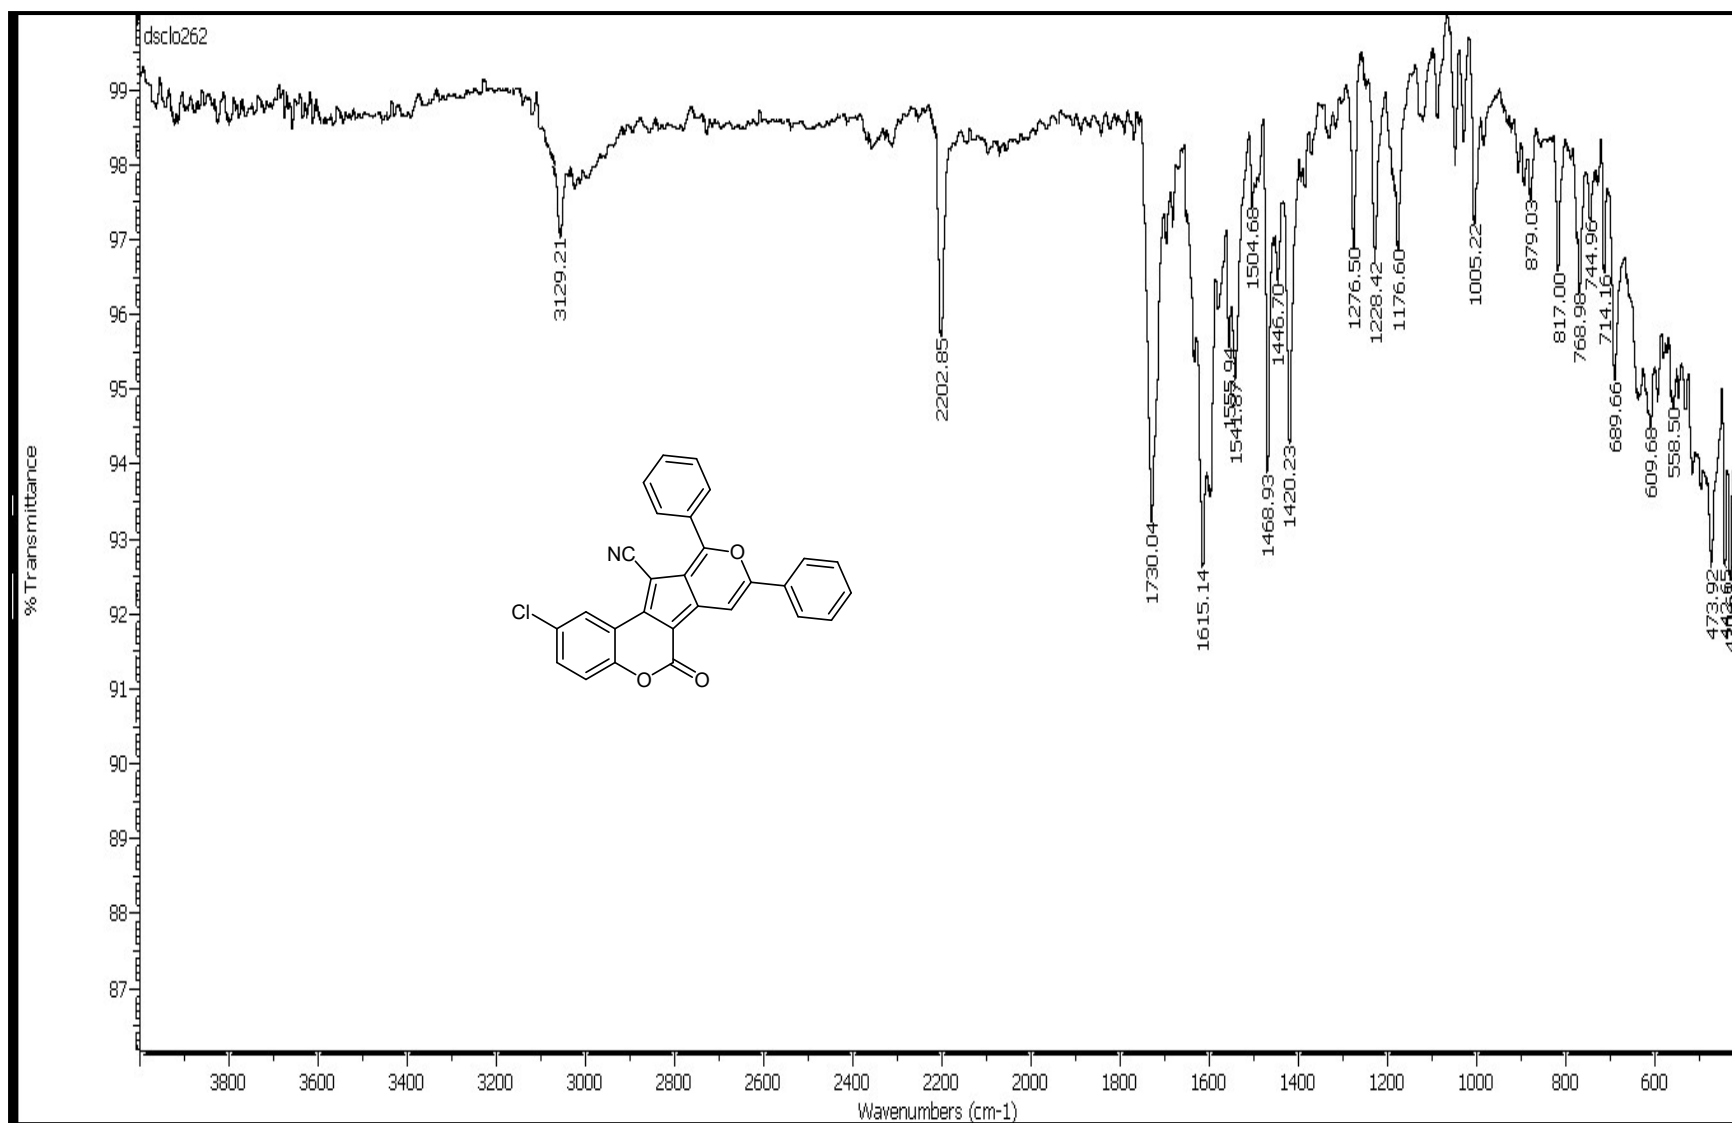

IR spectrum of 3b

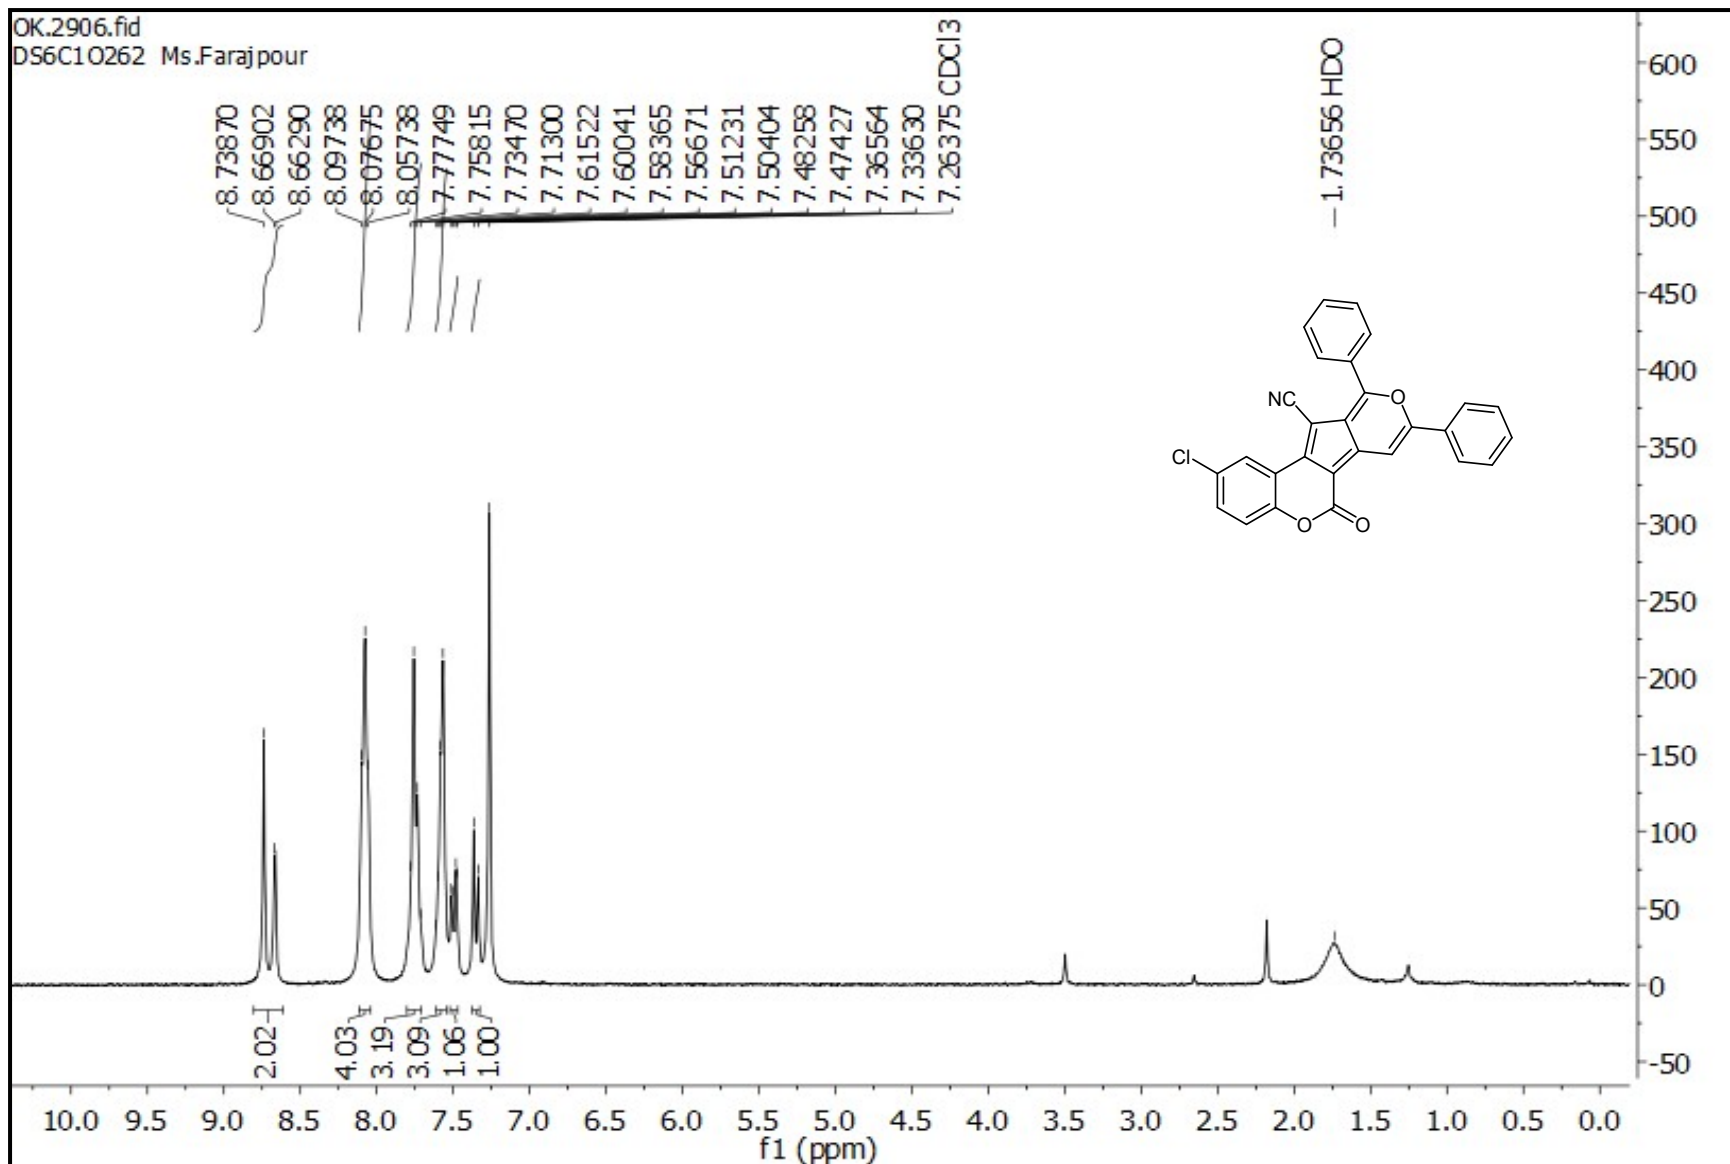

<sup>1</sup>H NMR (CDCl<sub>3</sub>, 300 MHz) of **3b**



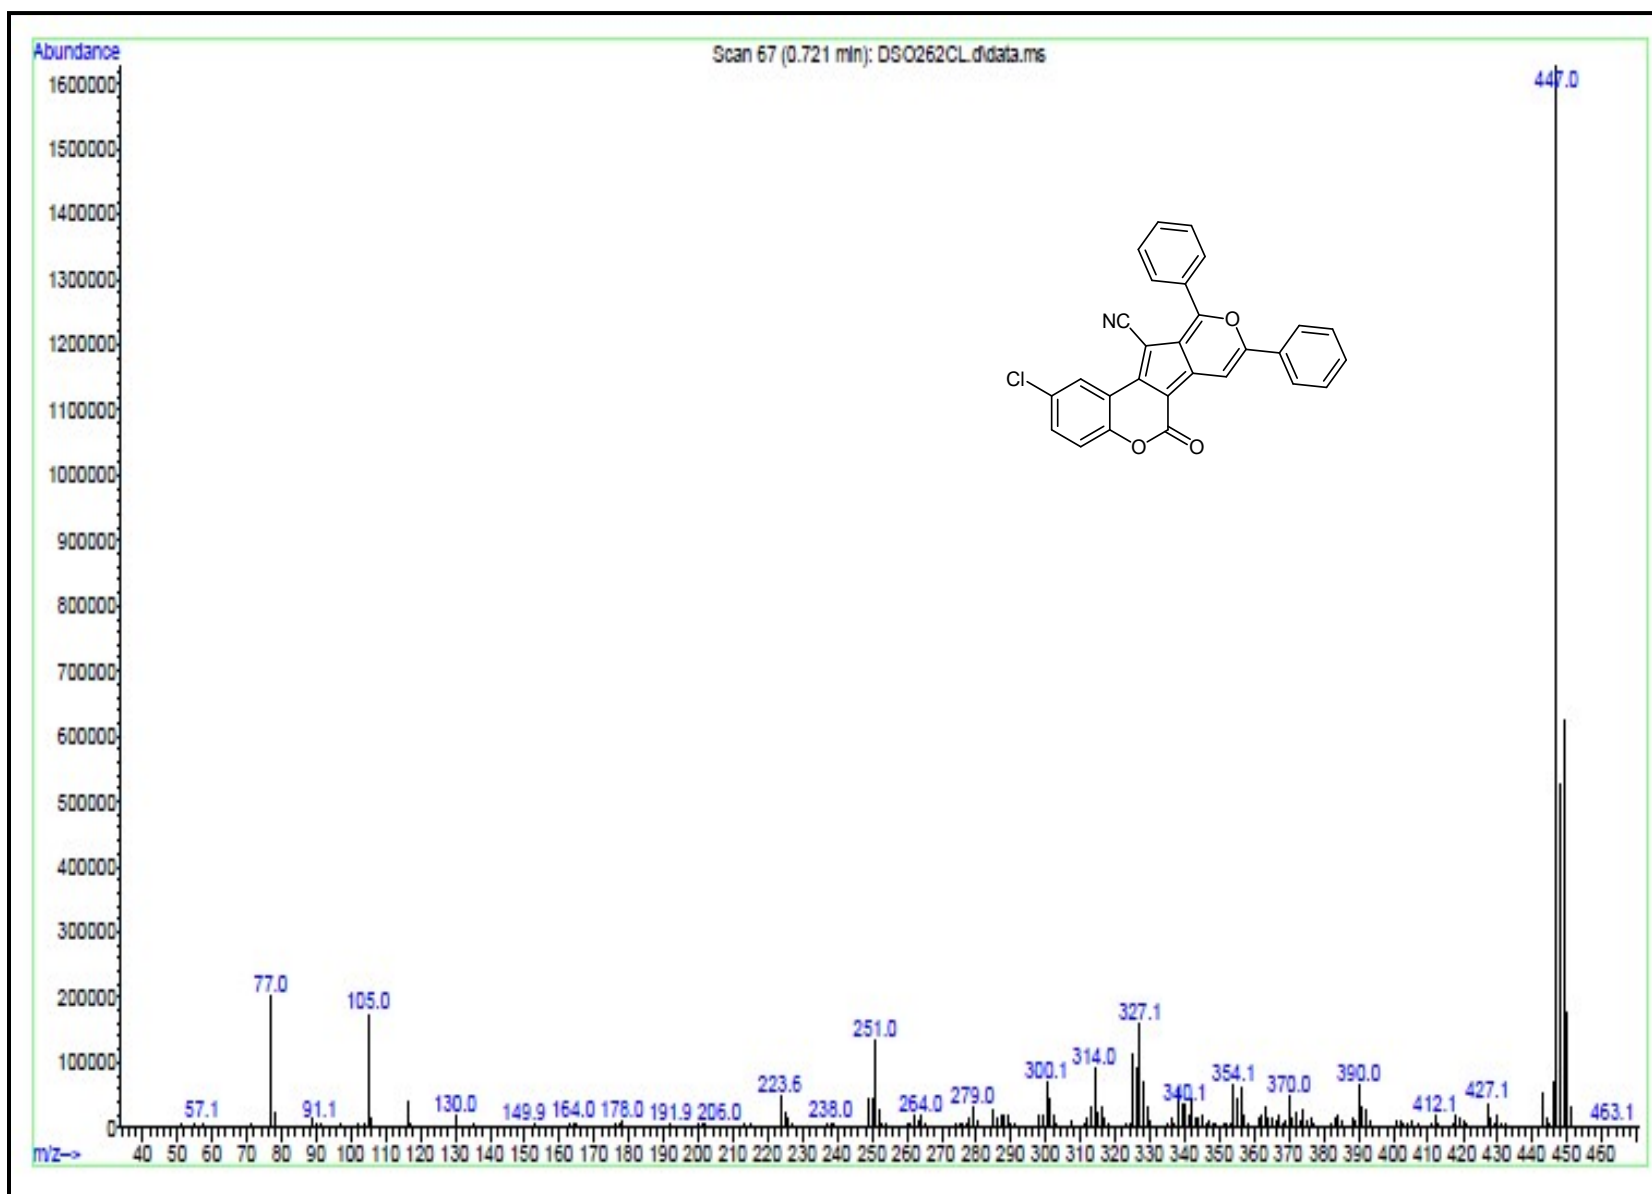

Mass spectrum of **3b**

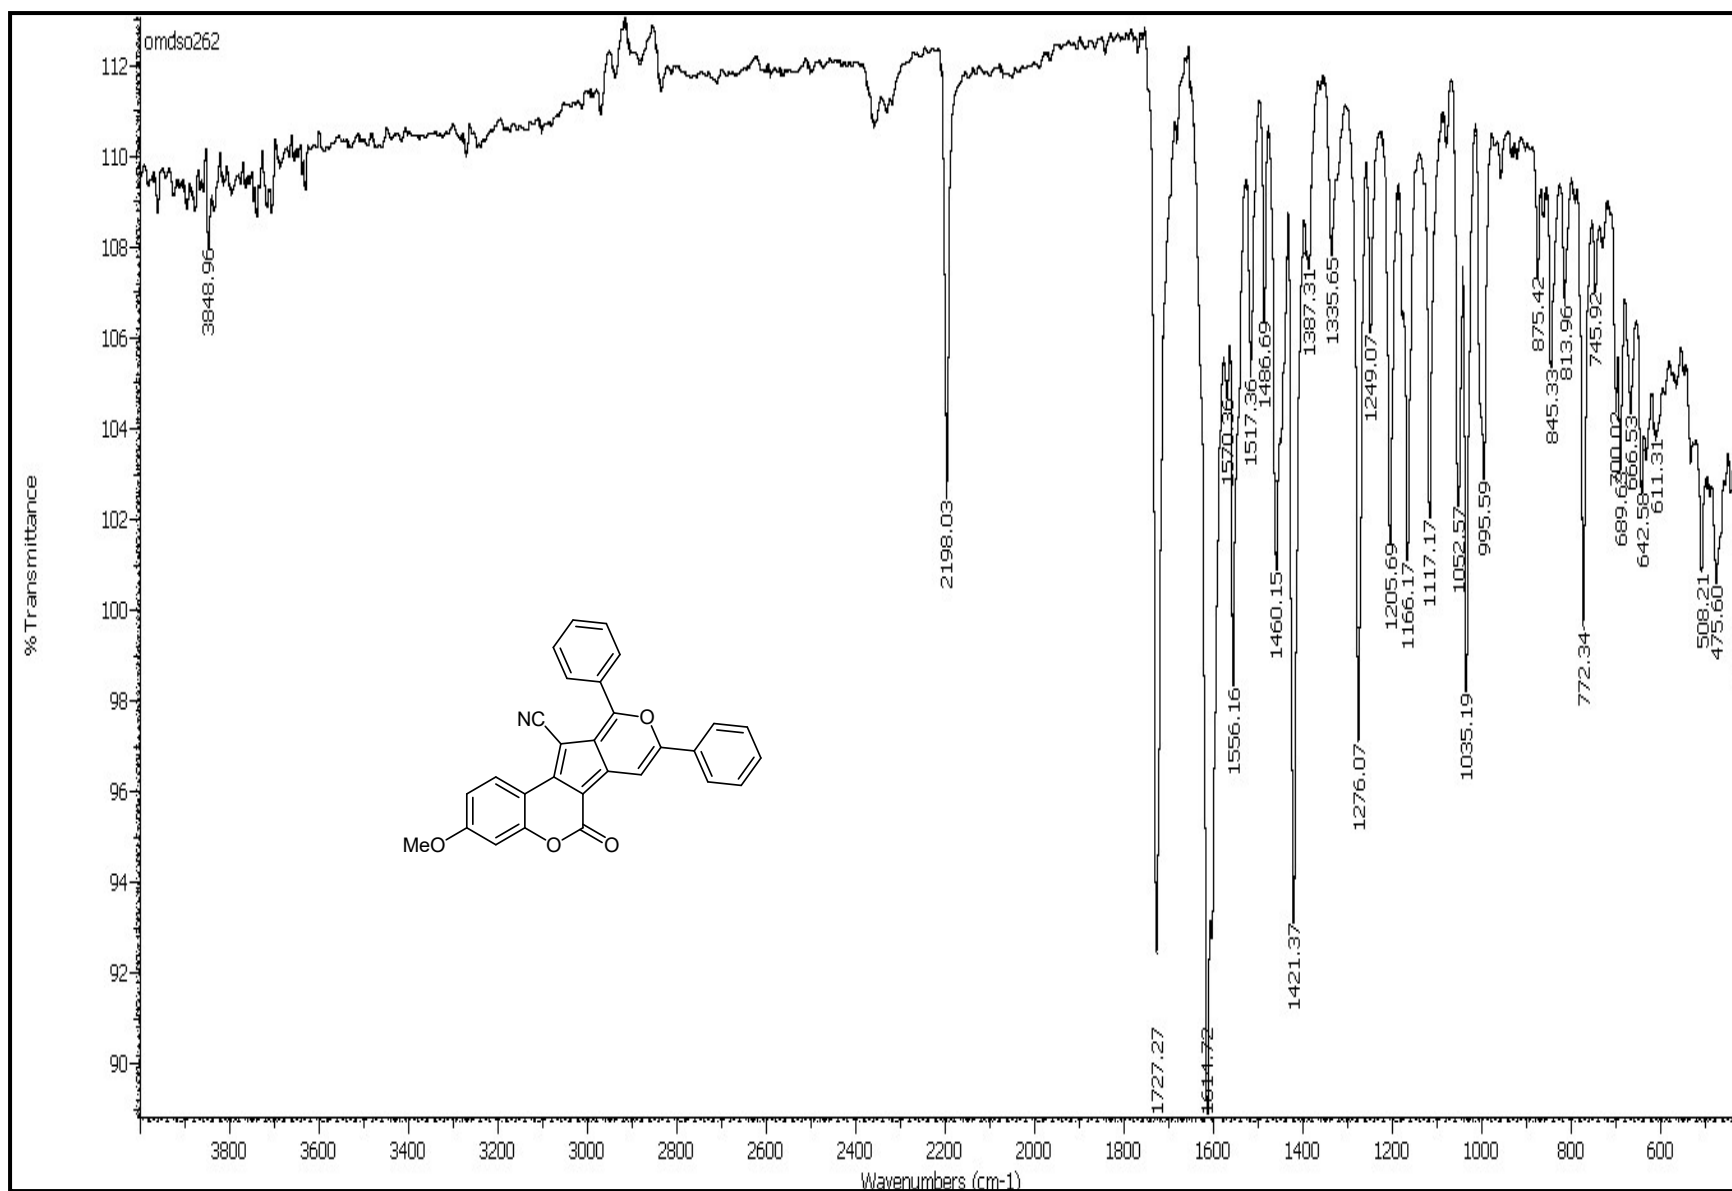

IR spectrum of 3c

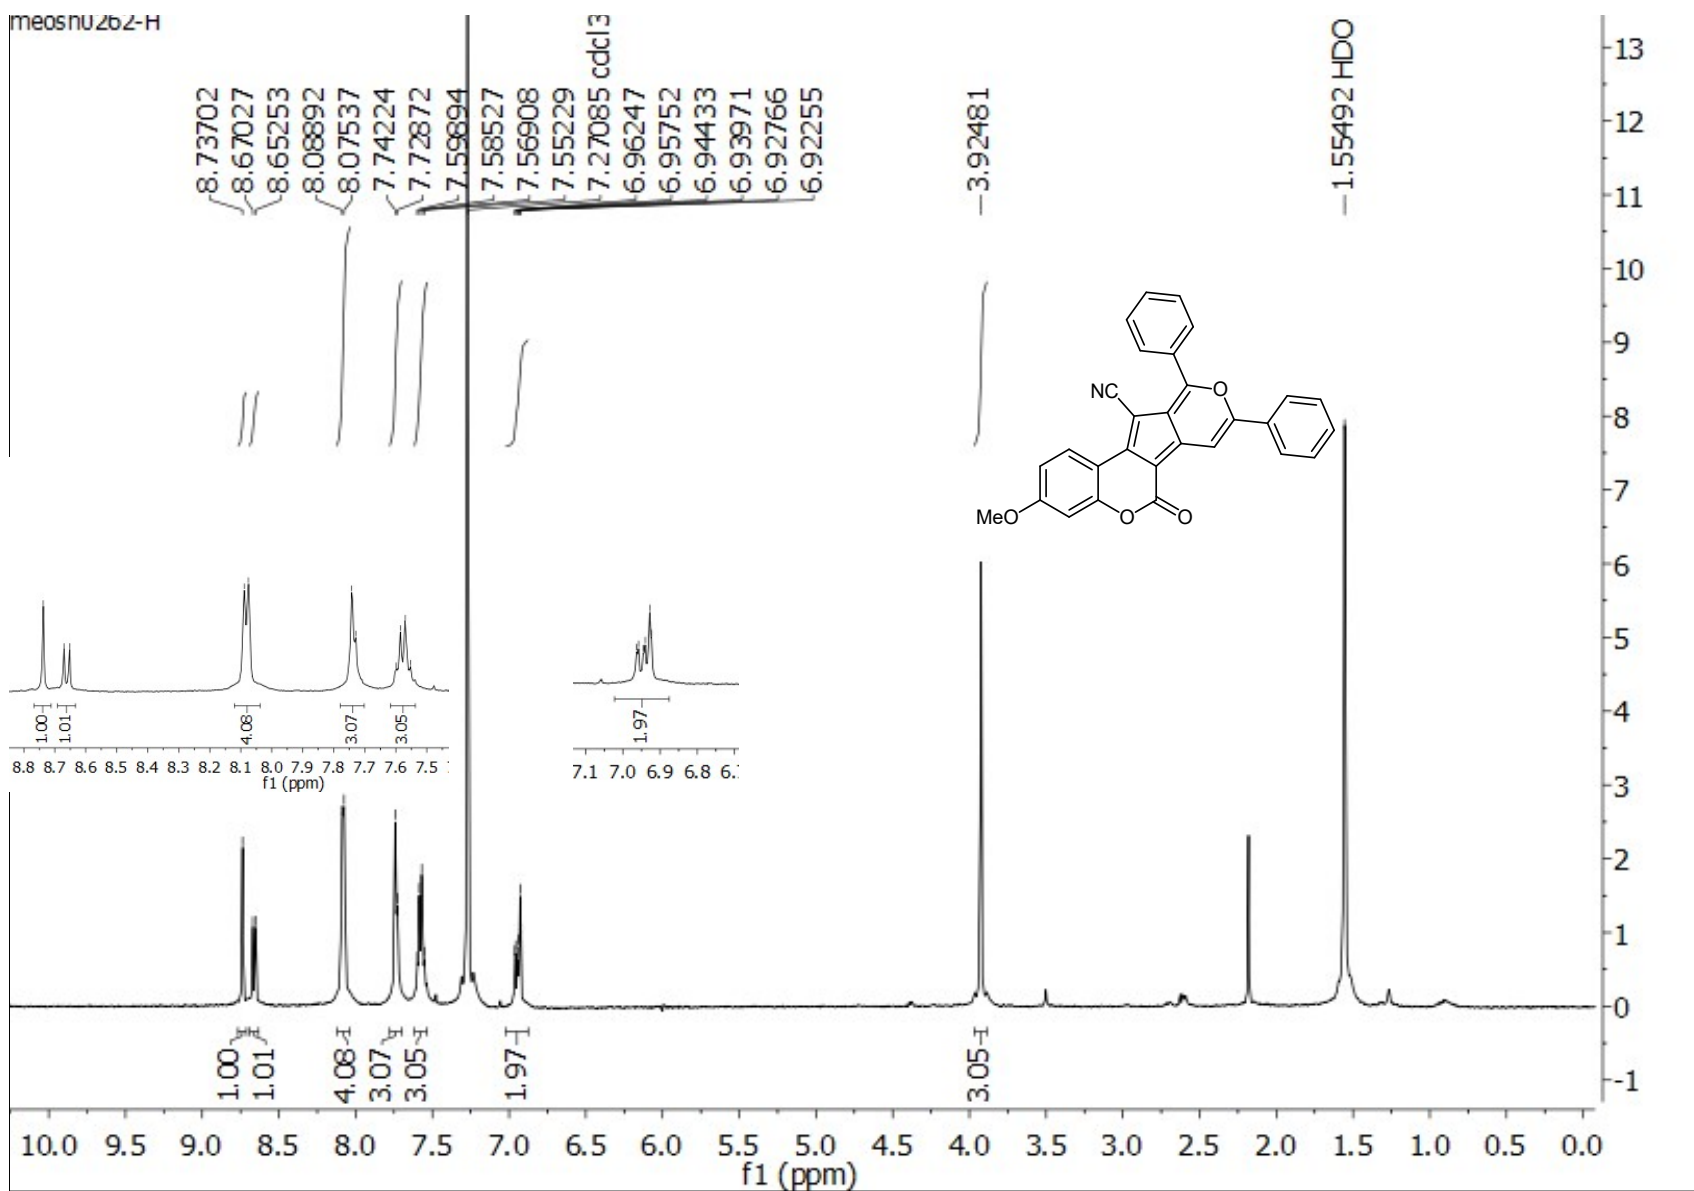

<sup>1</sup>H NMR (CDCl<sub>3</sub>, 500 MHz) of **3c**

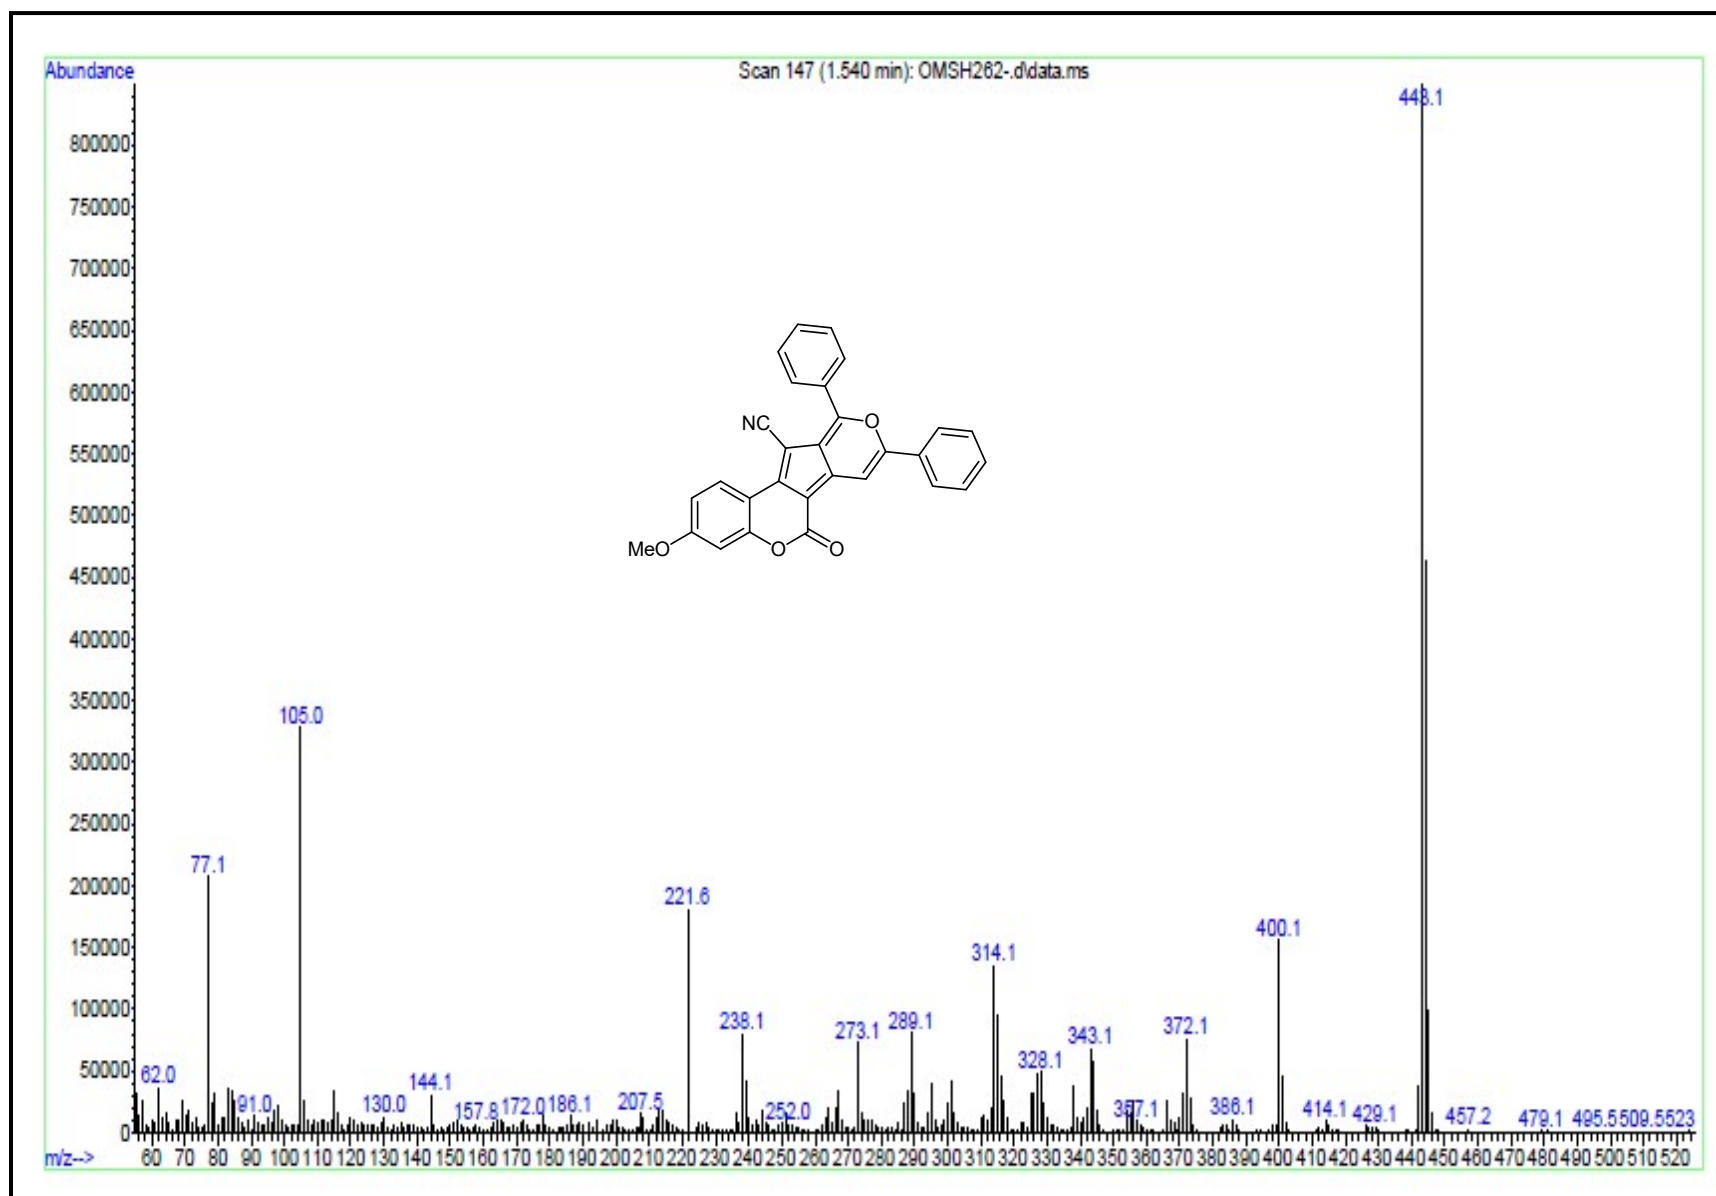

Mass spectrum of 3c

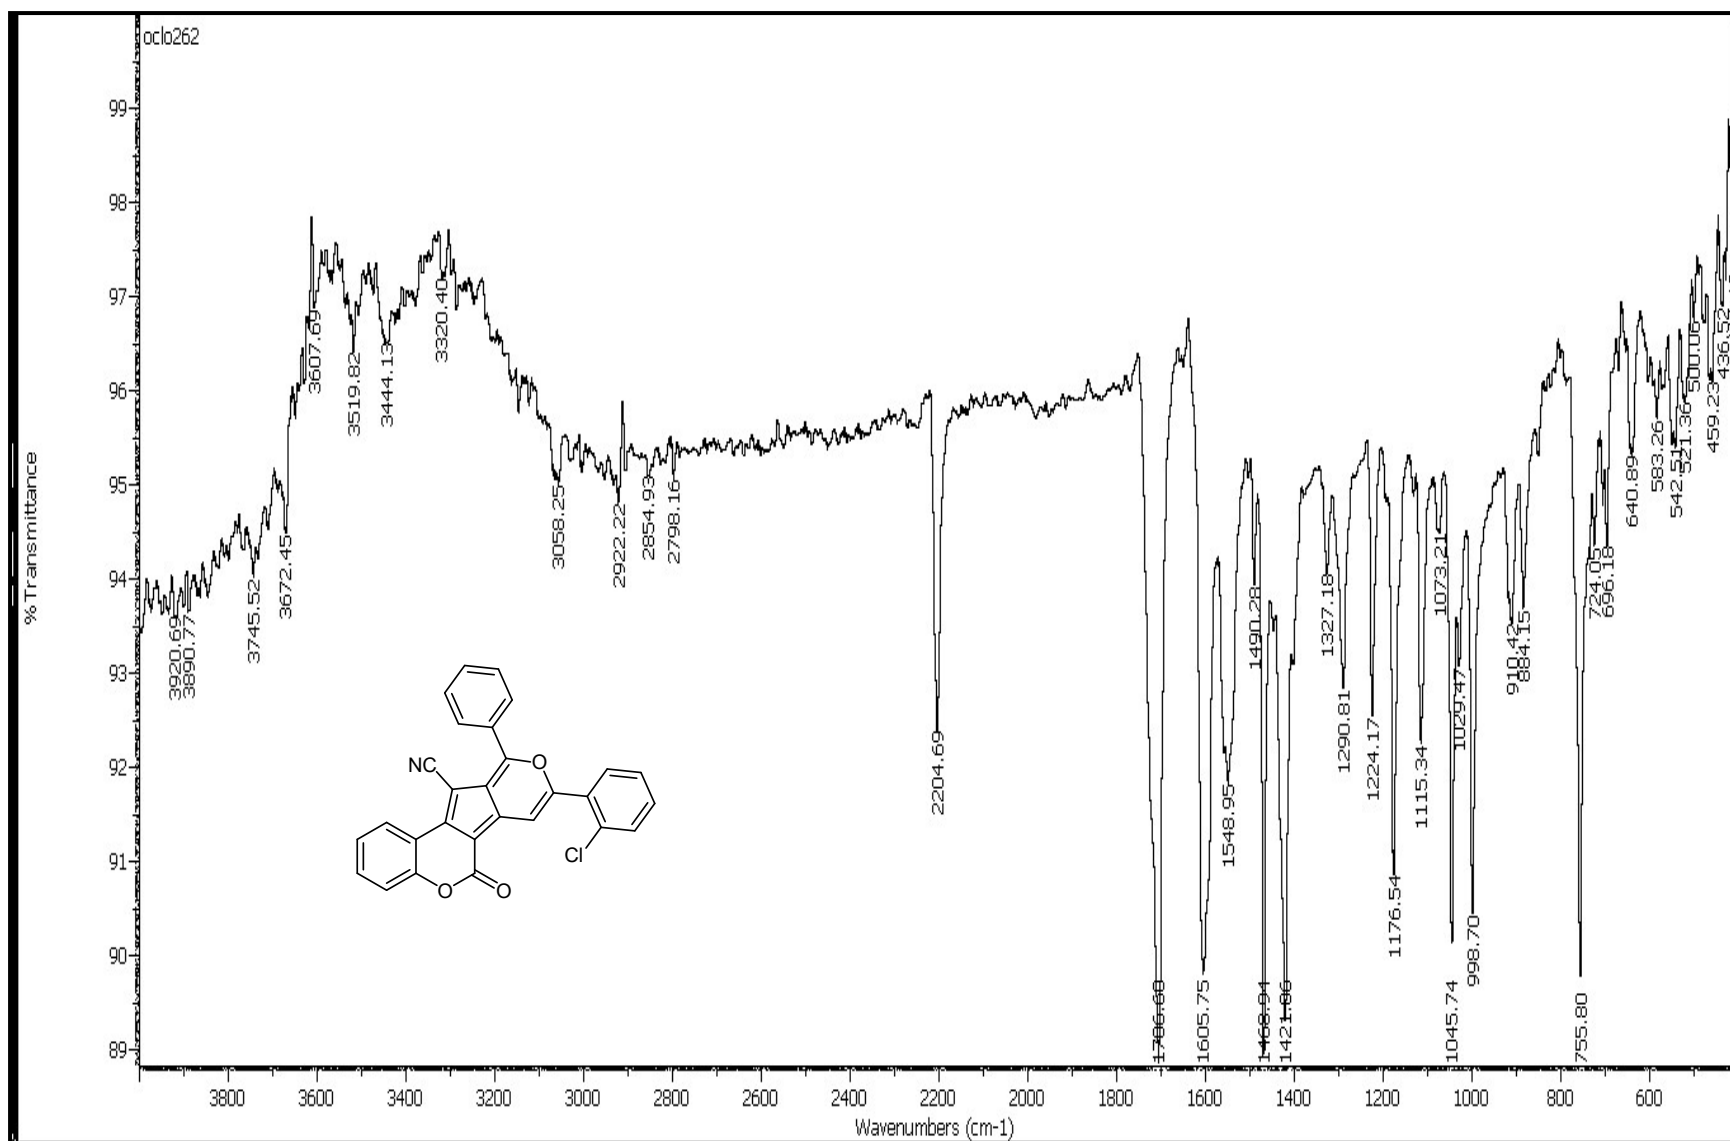

IR spectrum of 3d

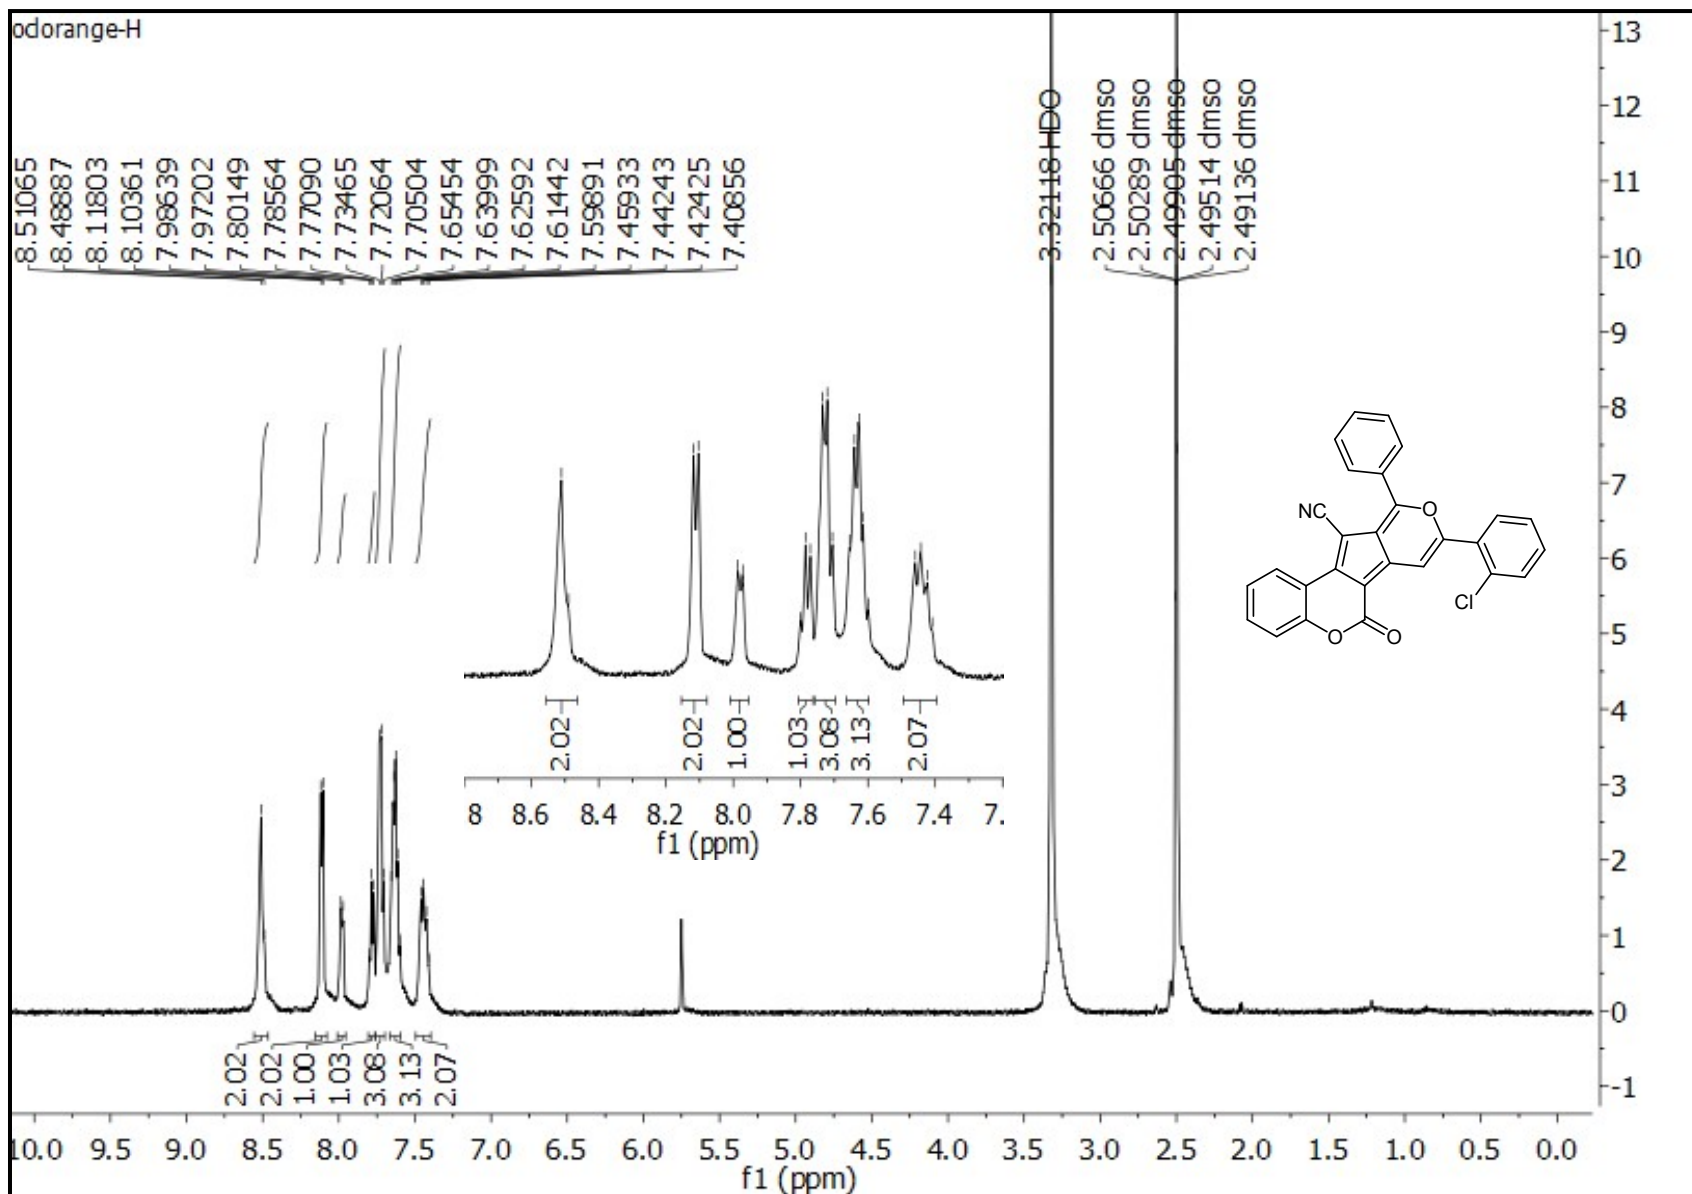

<sup>1</sup>H NMR (DMSO-*d*<sub>6</sub>, 500 MHz) of **3d**

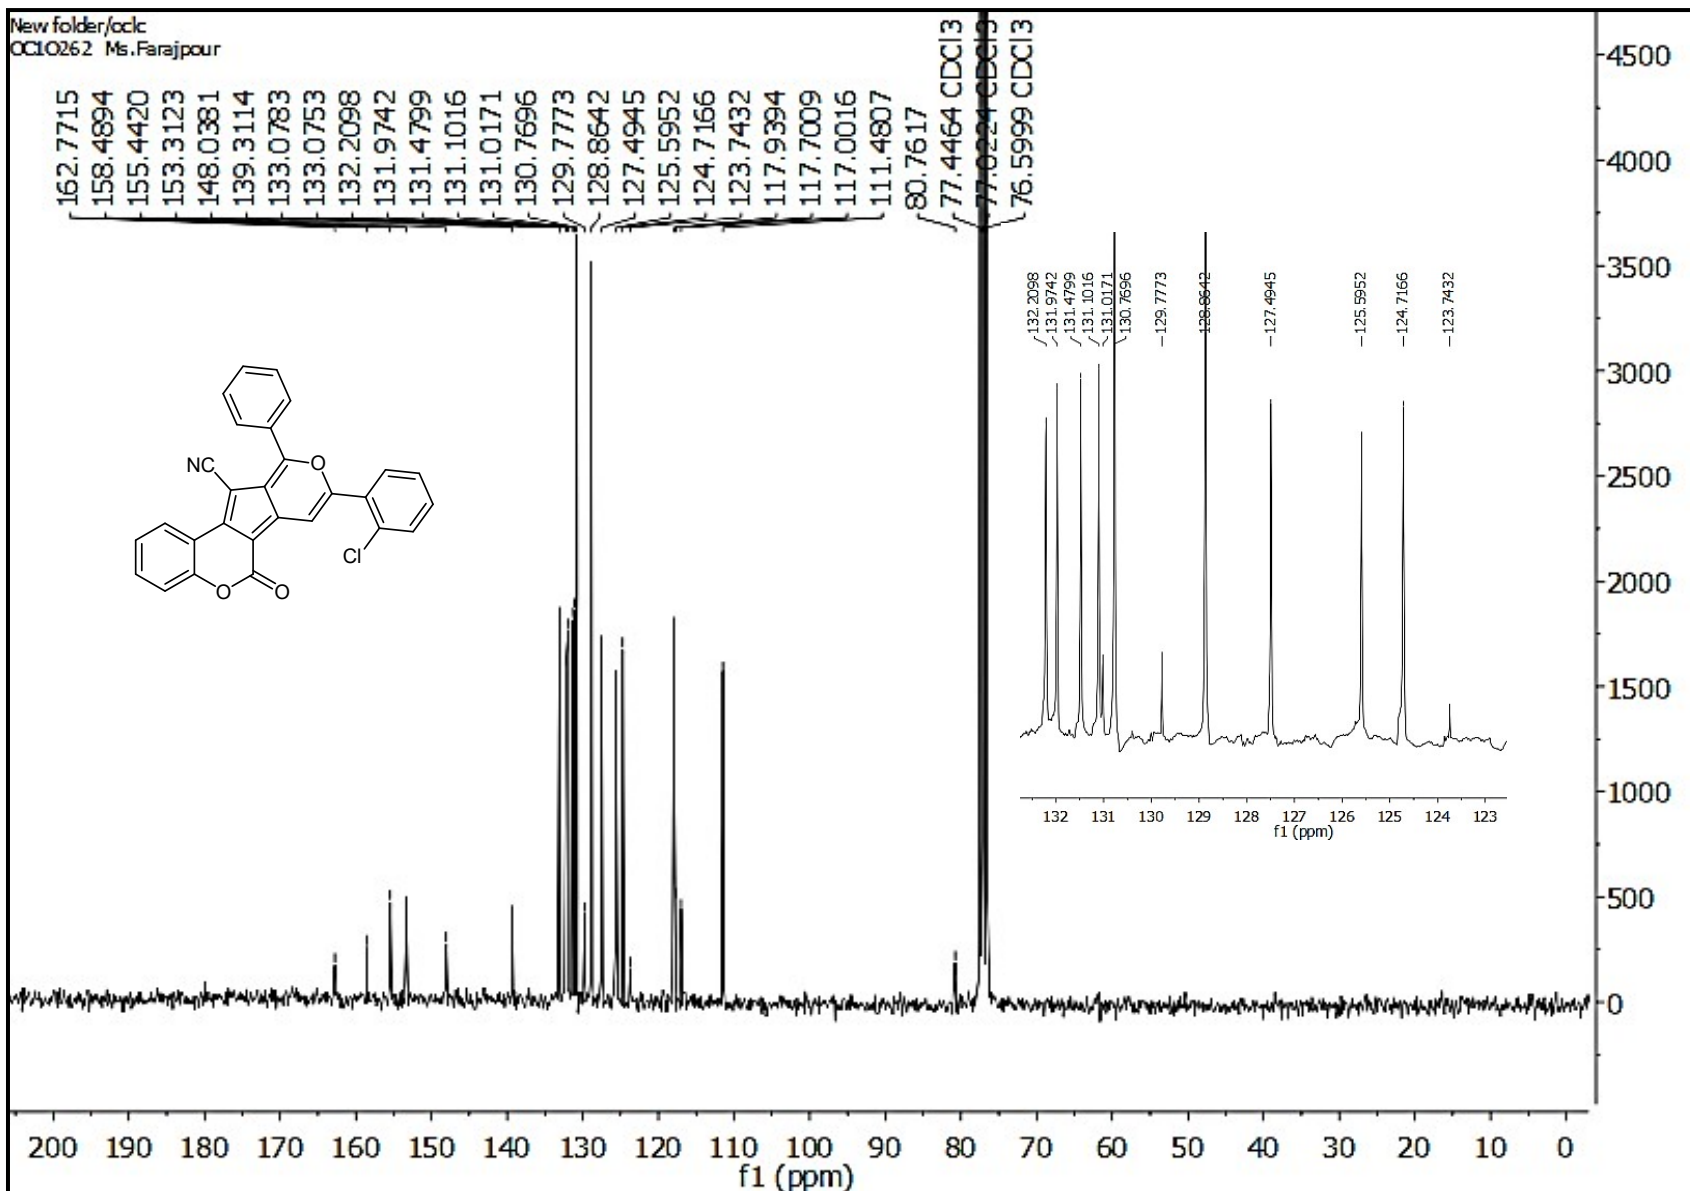

$^{13}\text{C}\{^1\text{H}\}$  NMR ( $\text{CDCl}_3$ , 75 MHz) of **3d**

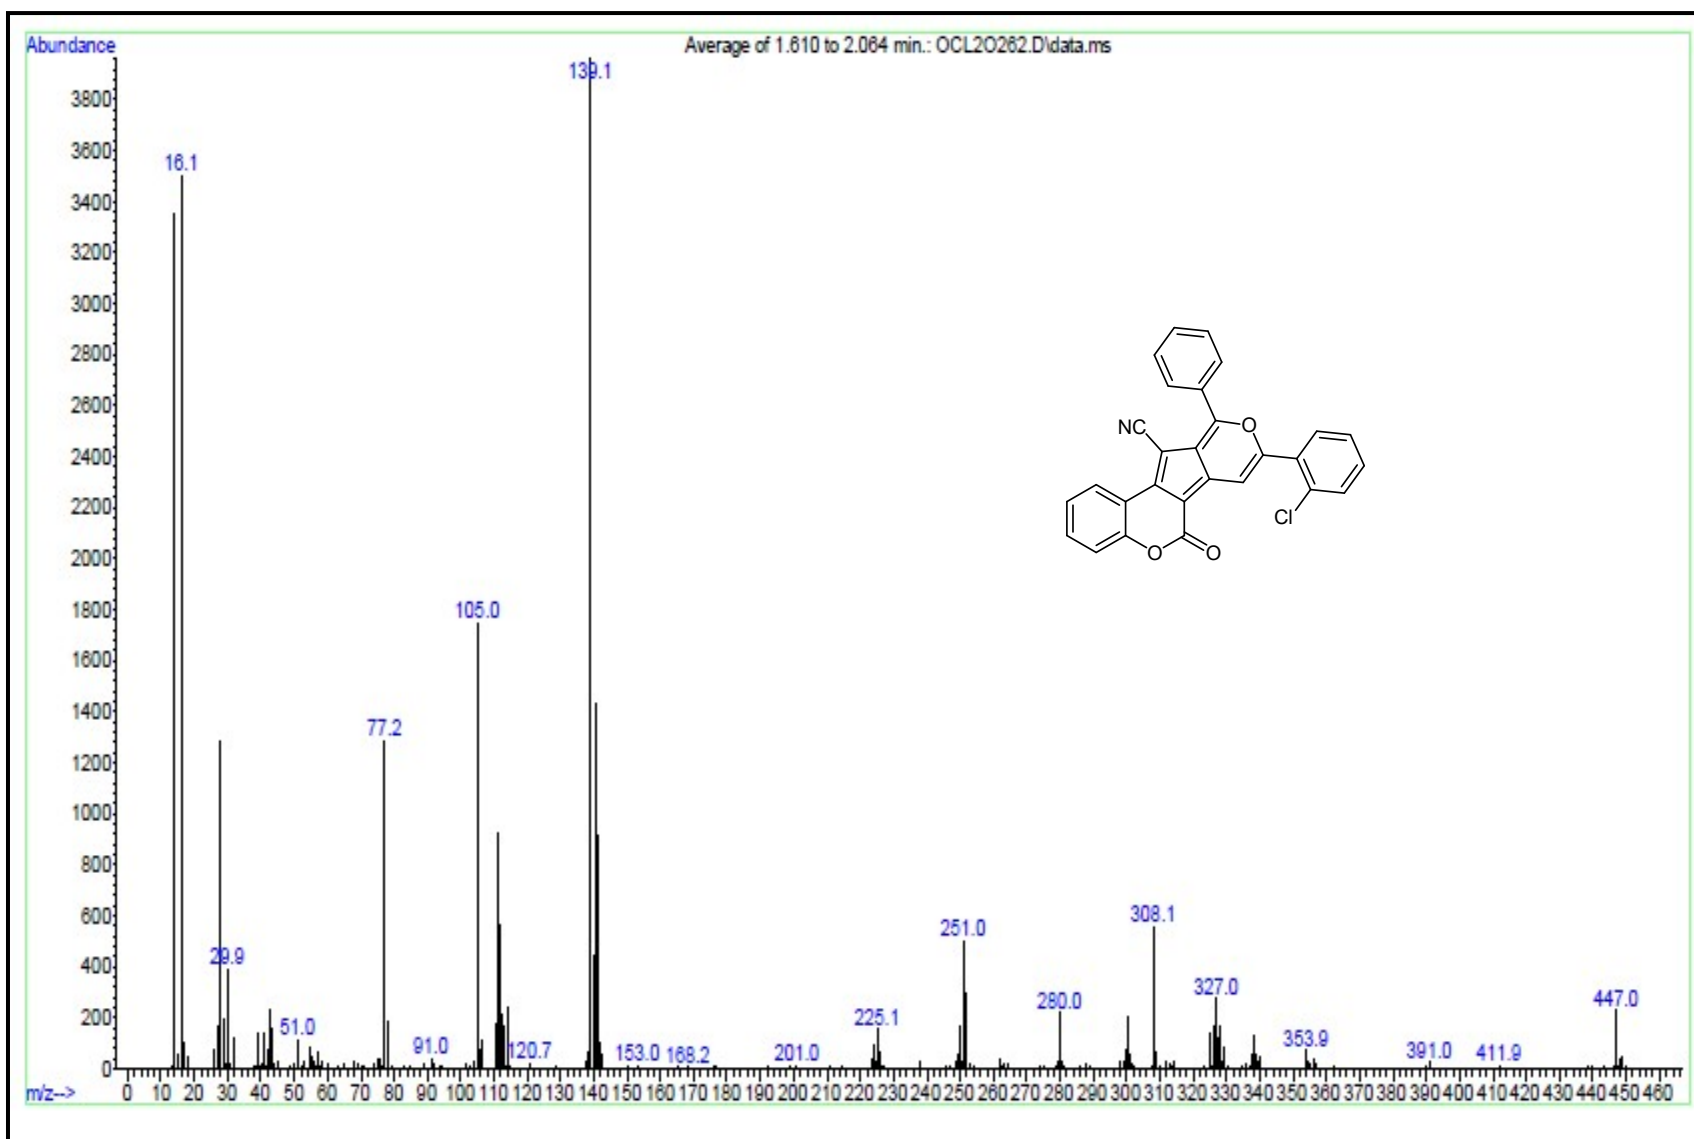

Mass spectrum of **3d**



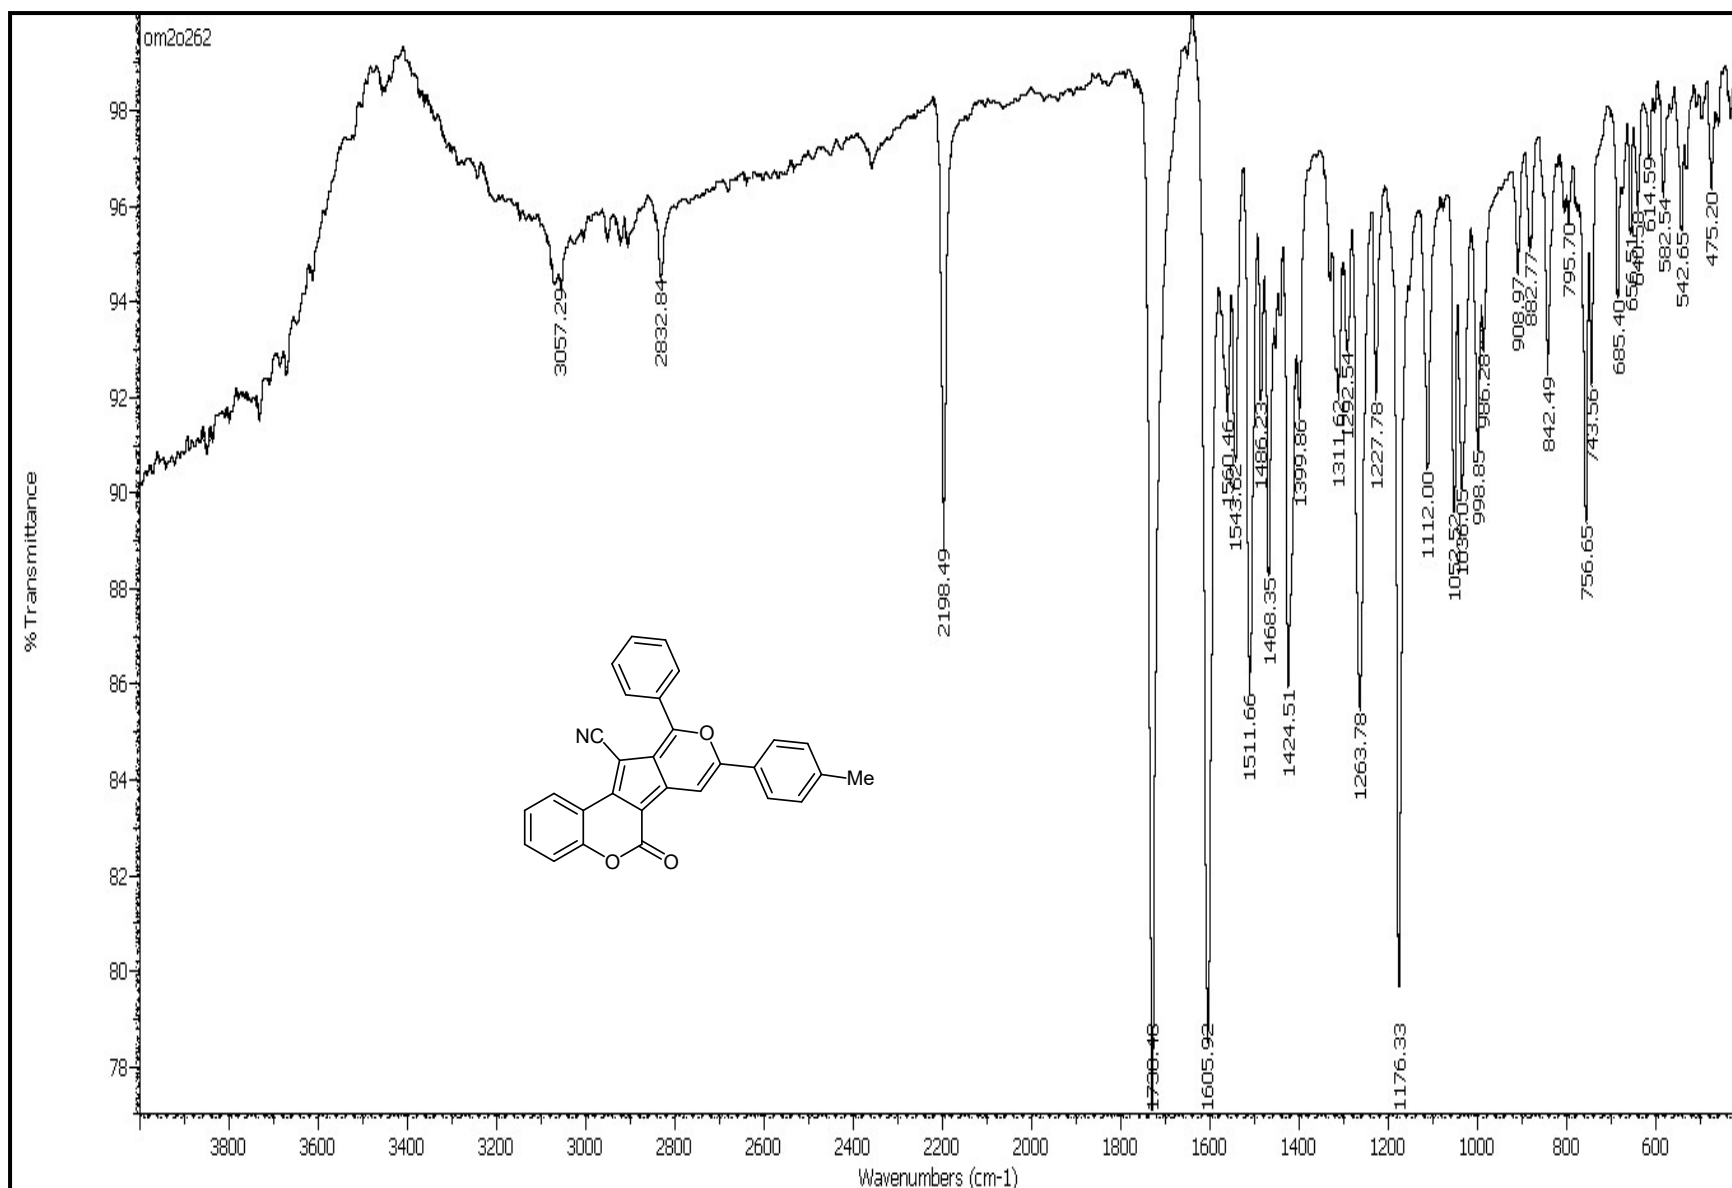

IR spectrum of **3e**

OK\_2901.tia  
Meth0262 Ms.Farajpour

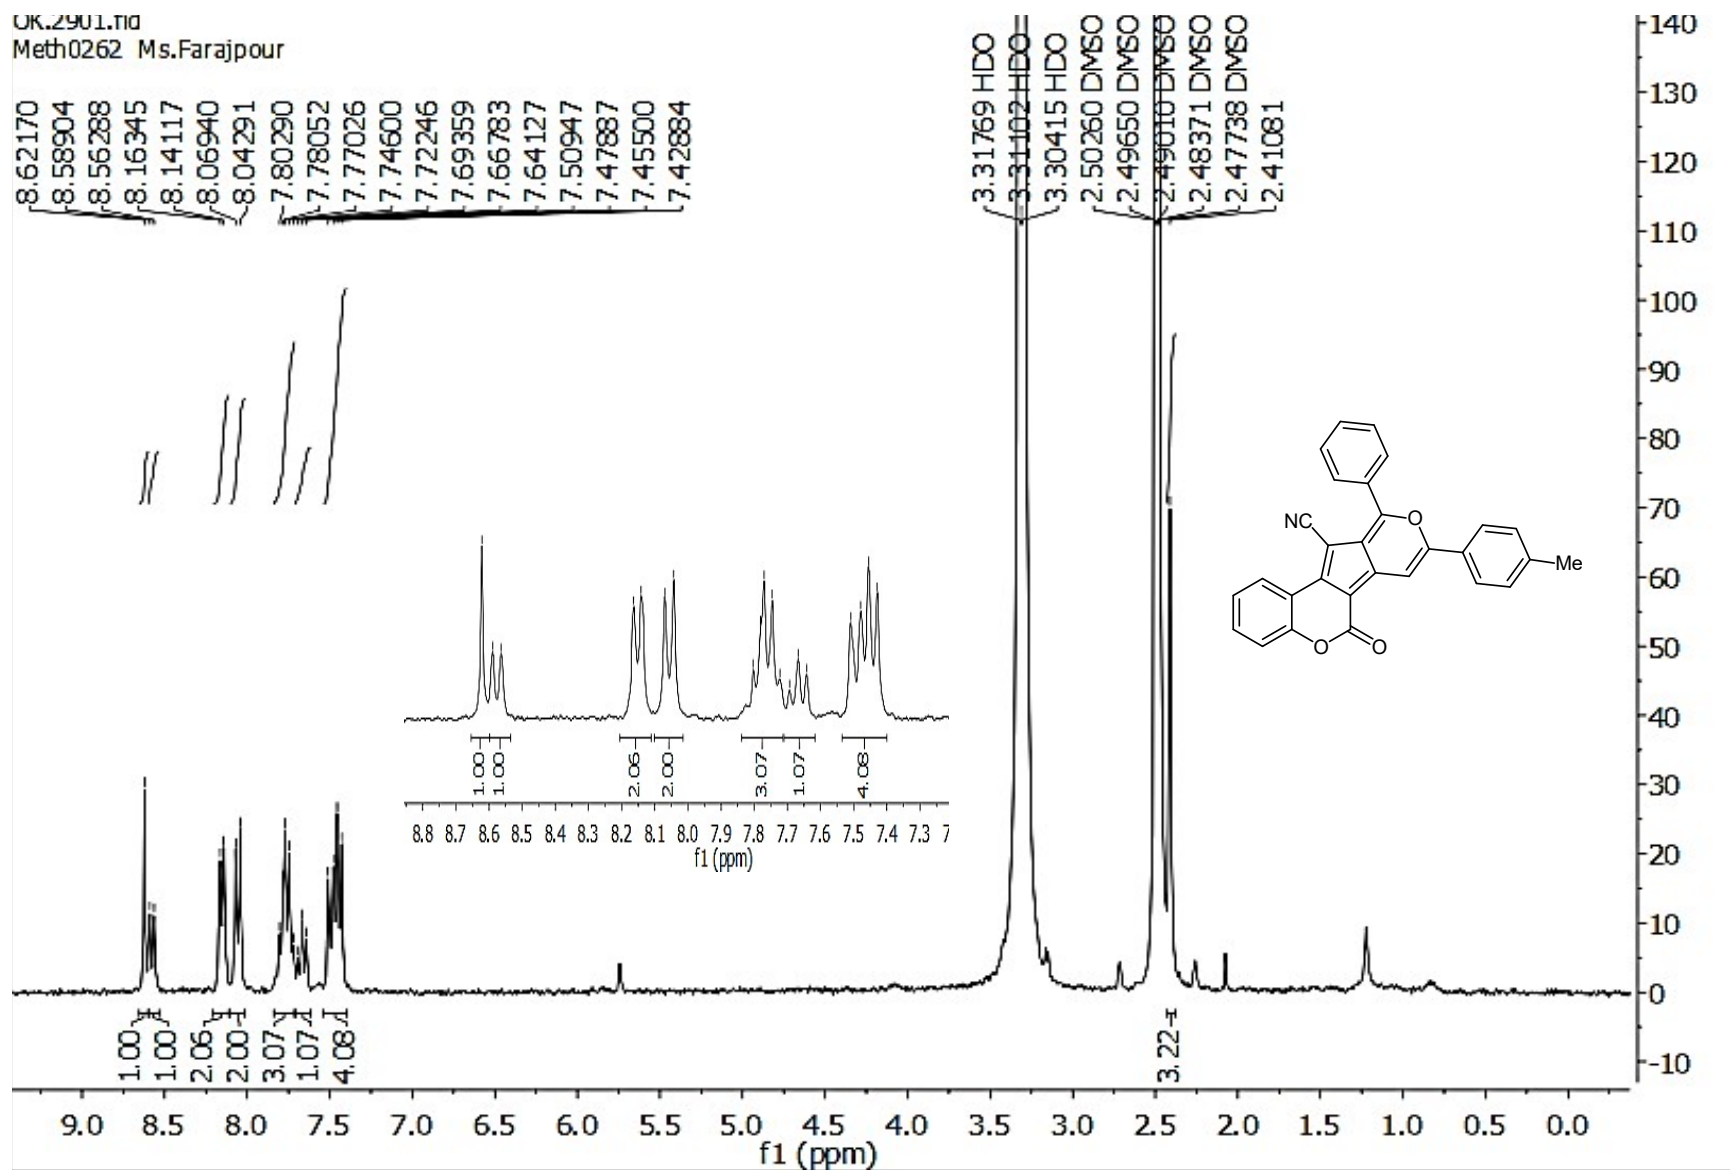

<sup>1</sup>H NMR (DMSO-*d*<sub>6</sub>, 300 MHz) of 3e

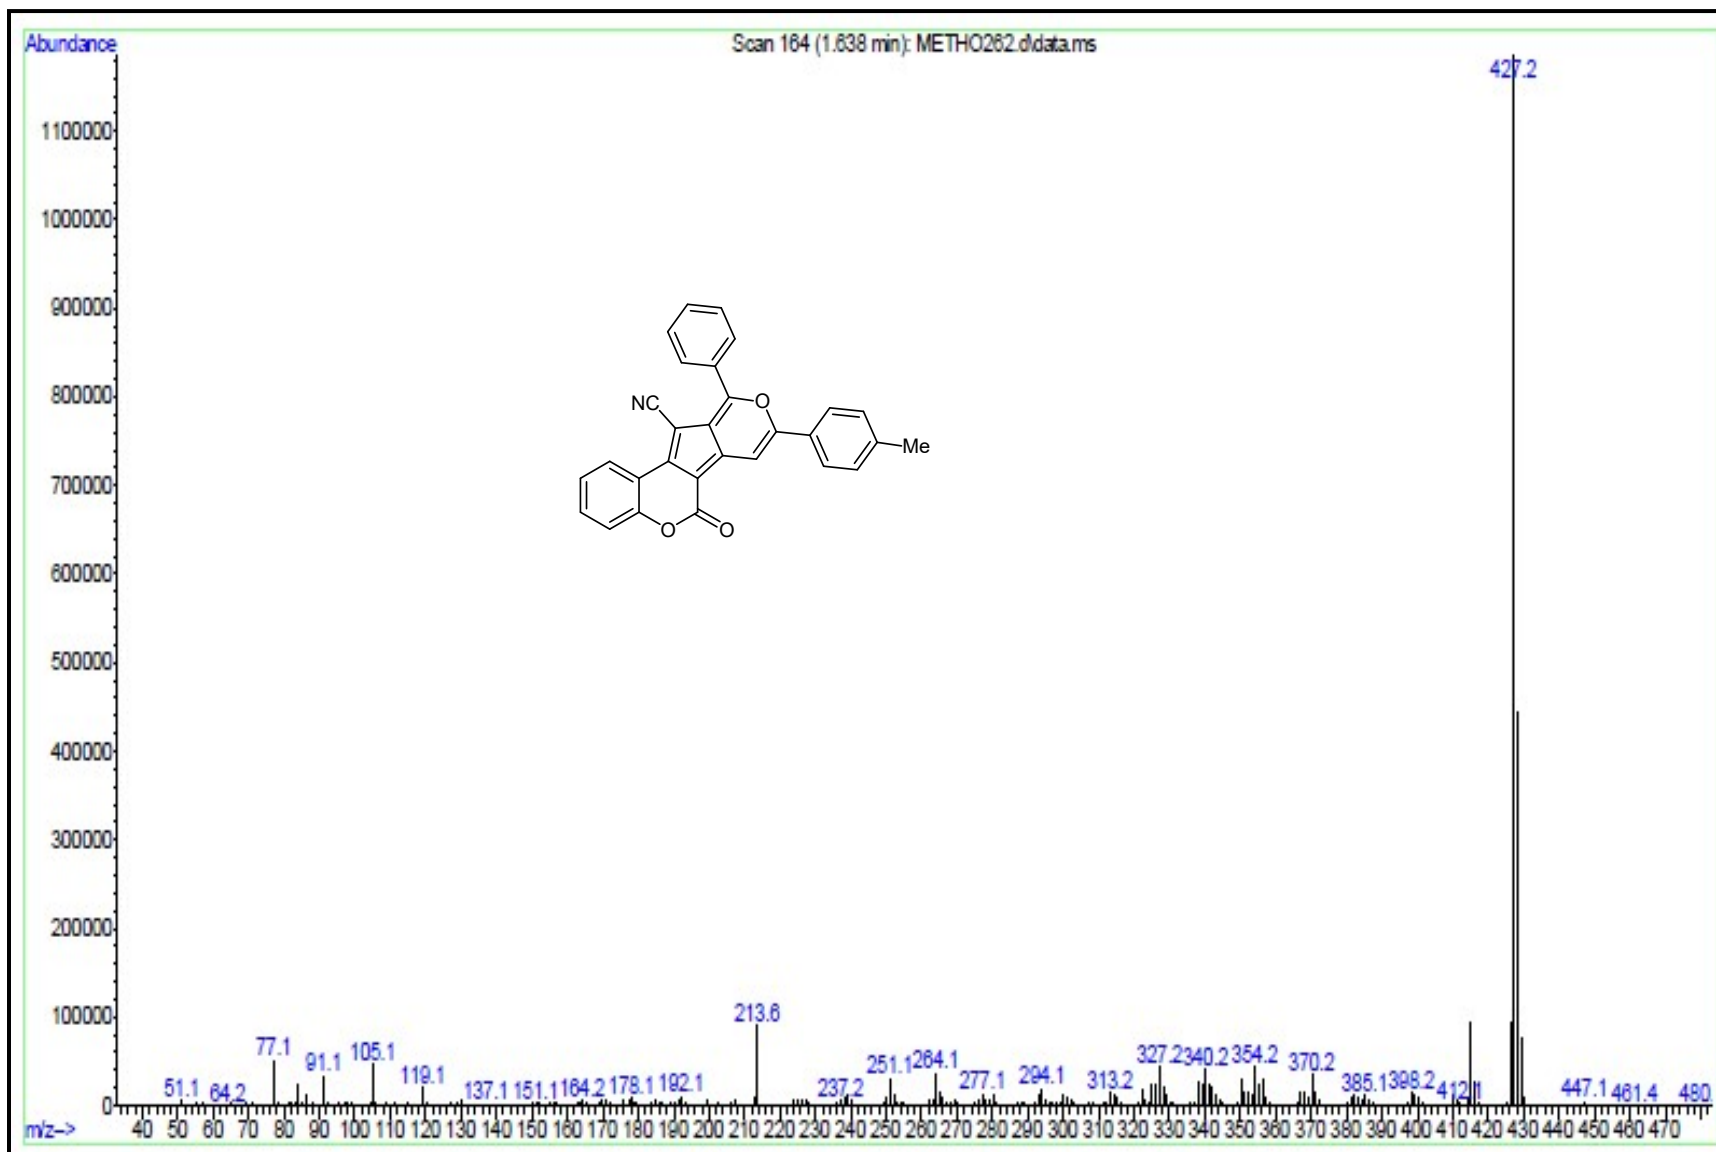

Mass spectrum of 3e

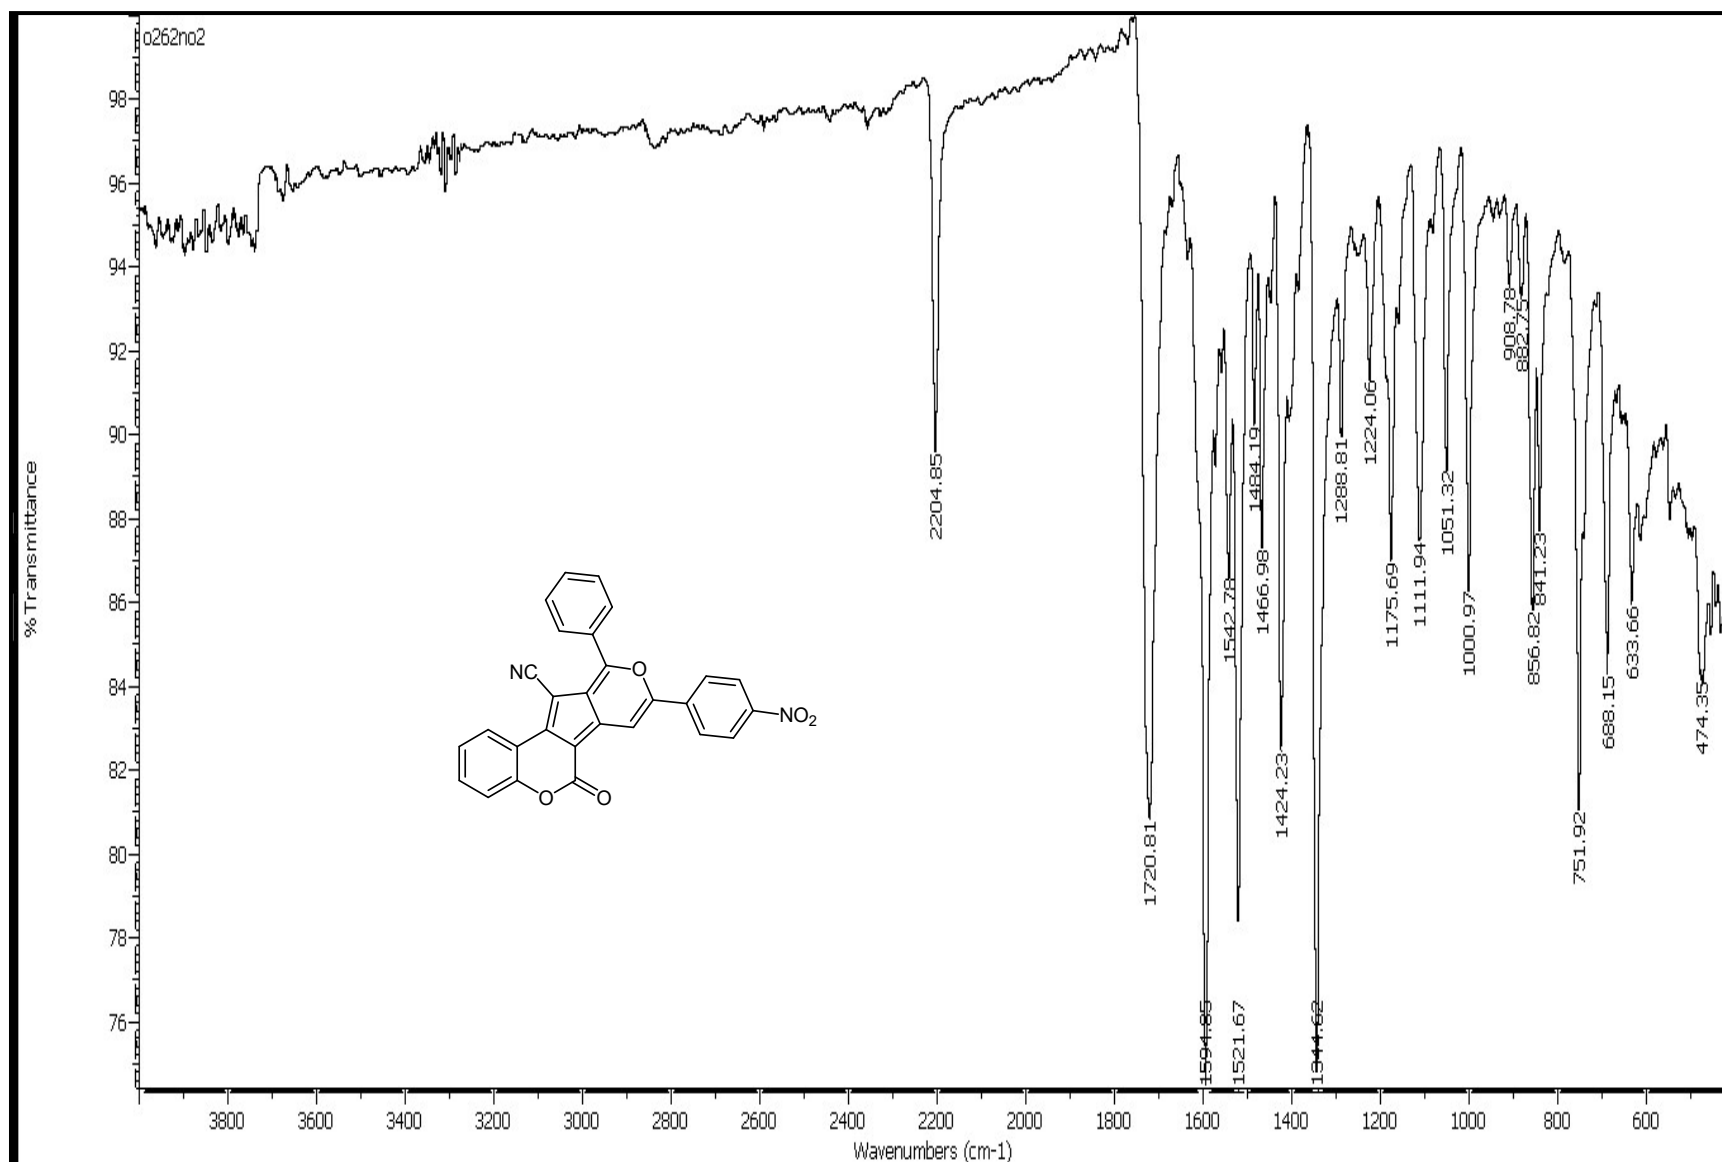

IR spectrum of **3f**

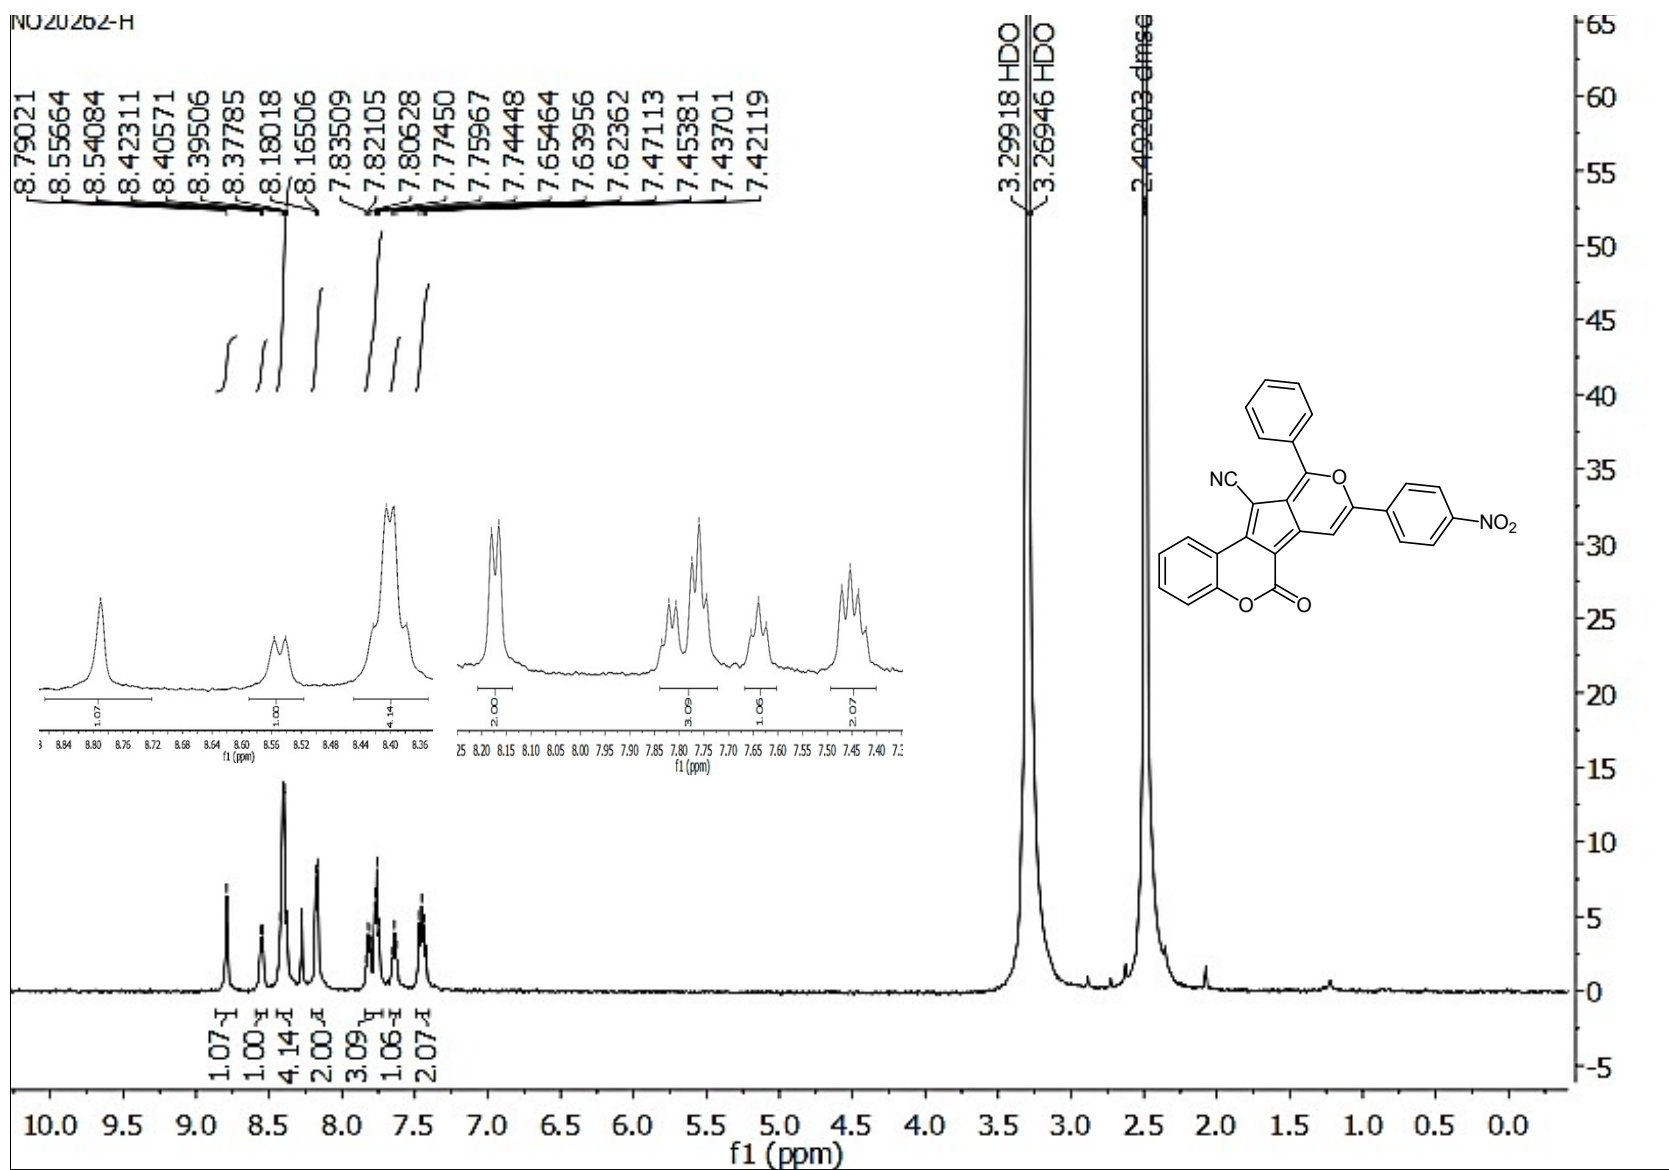

<sup>1</sup>H NMR (DMSO-*d*<sub>6</sub>, 300 MHz) of 3f

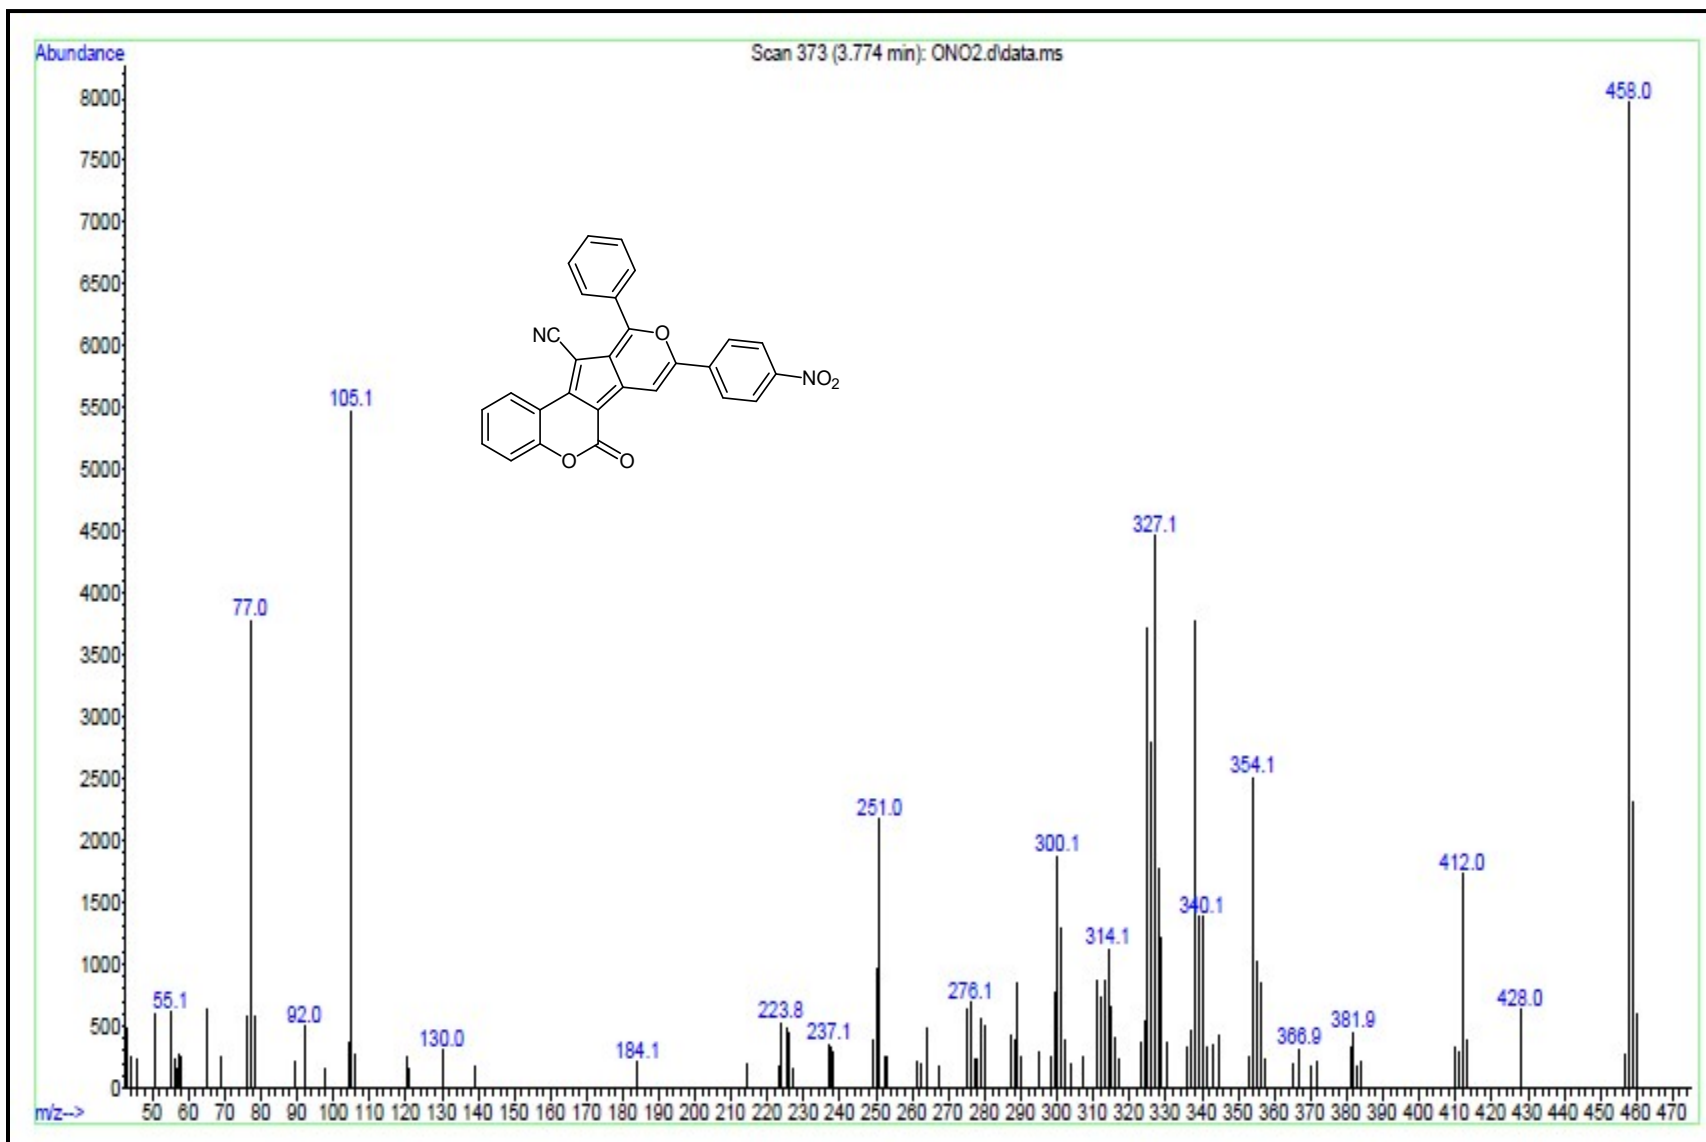

Mass spectrum of **3f**

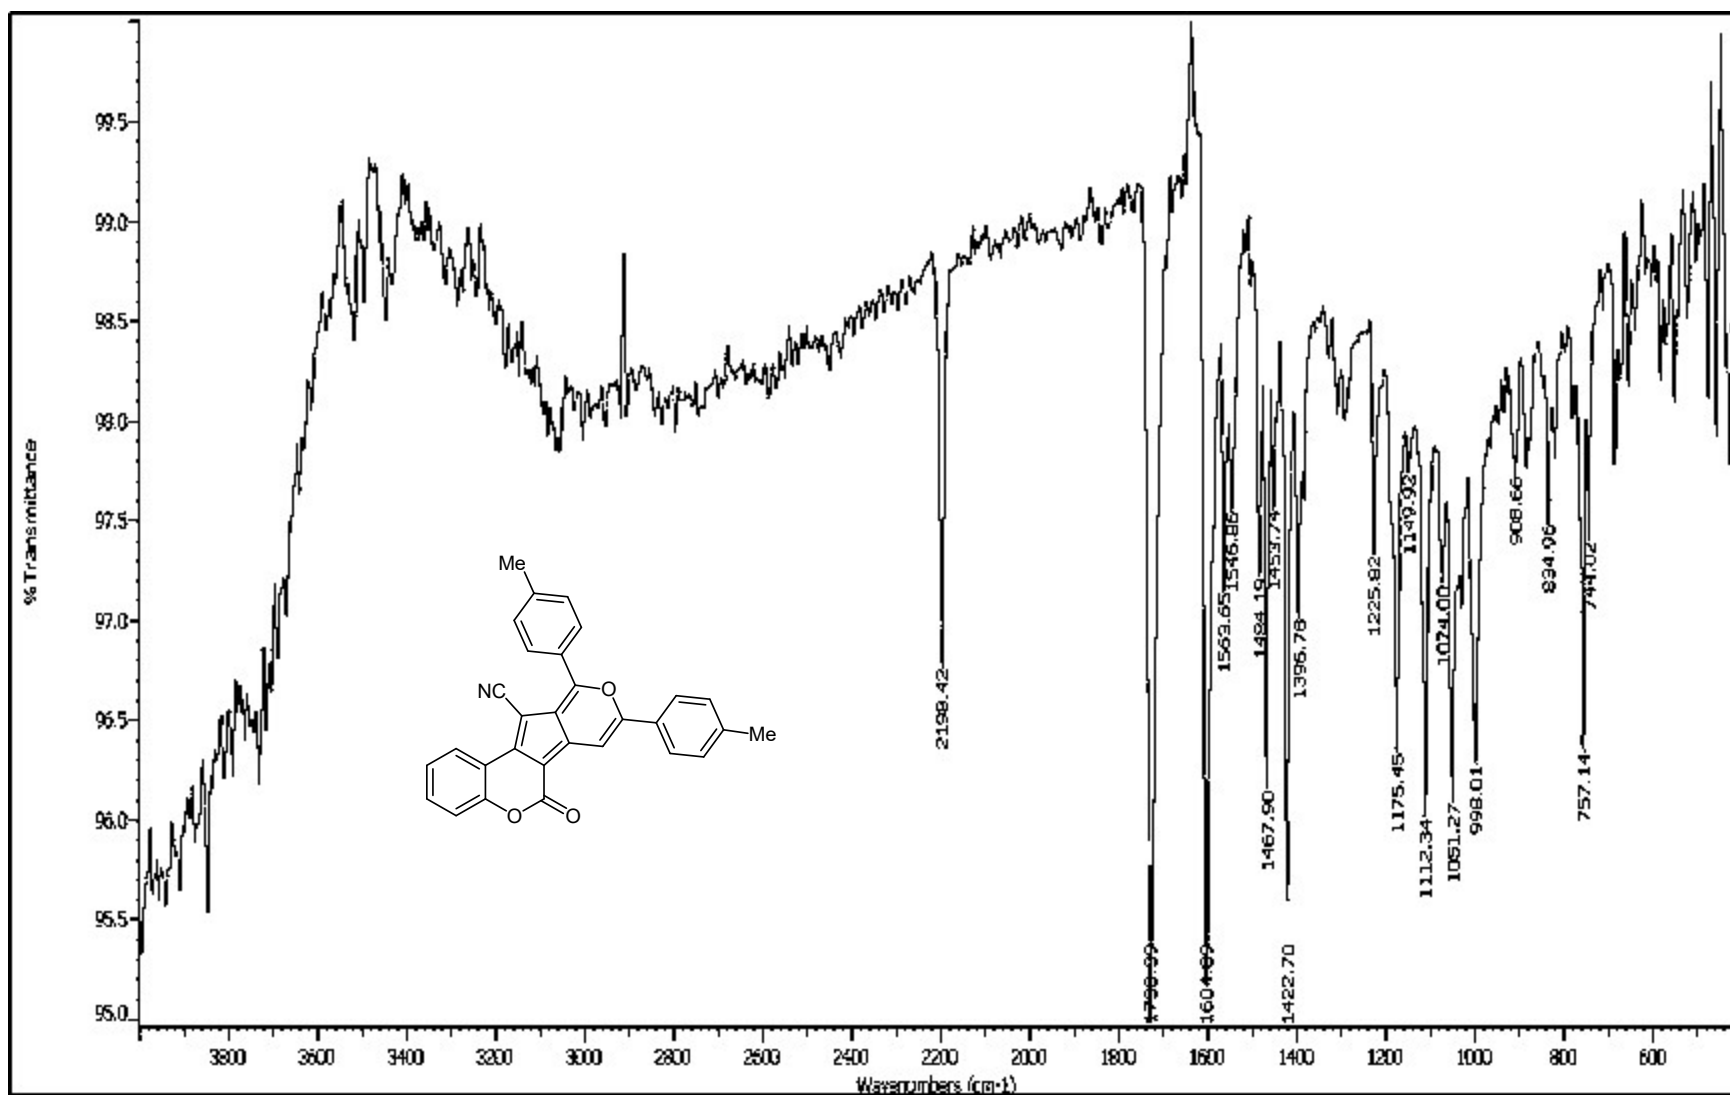

IR spectrum of 3g

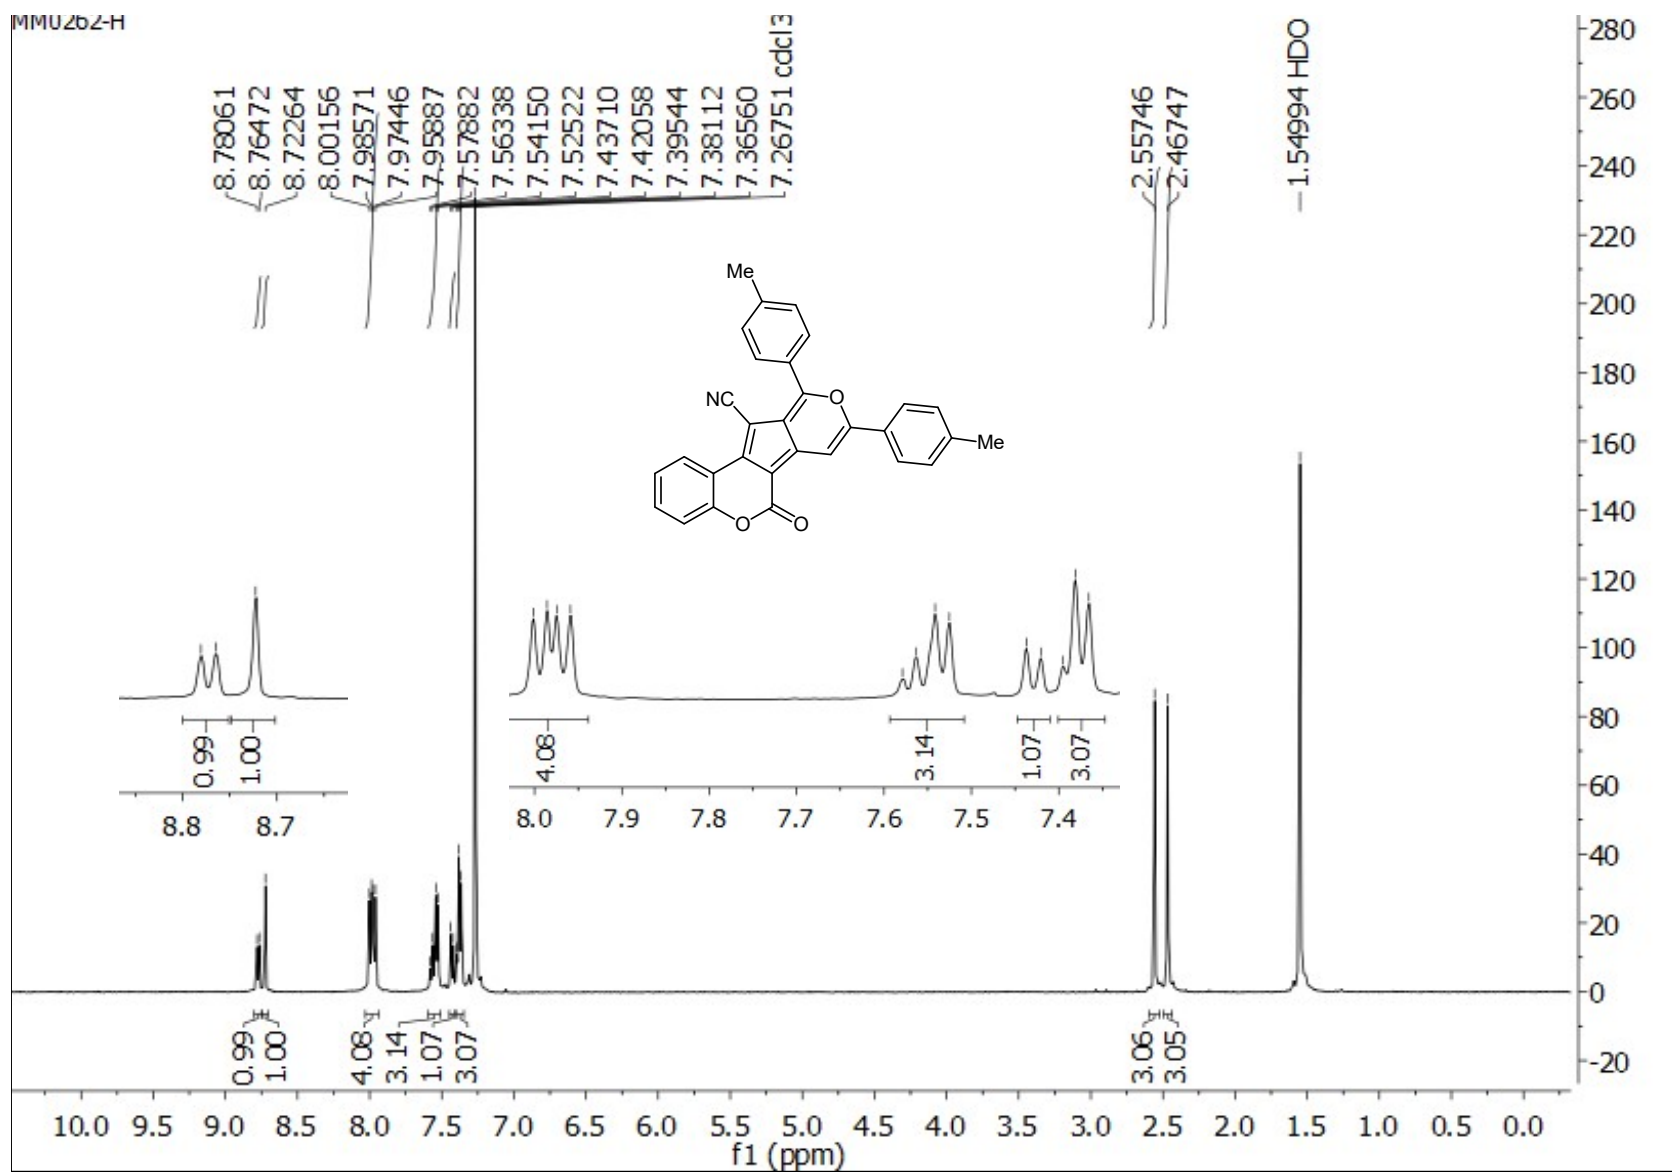

<sup>1</sup>H NMR (CDCl<sub>3</sub>, 500 MHz) of **3g**



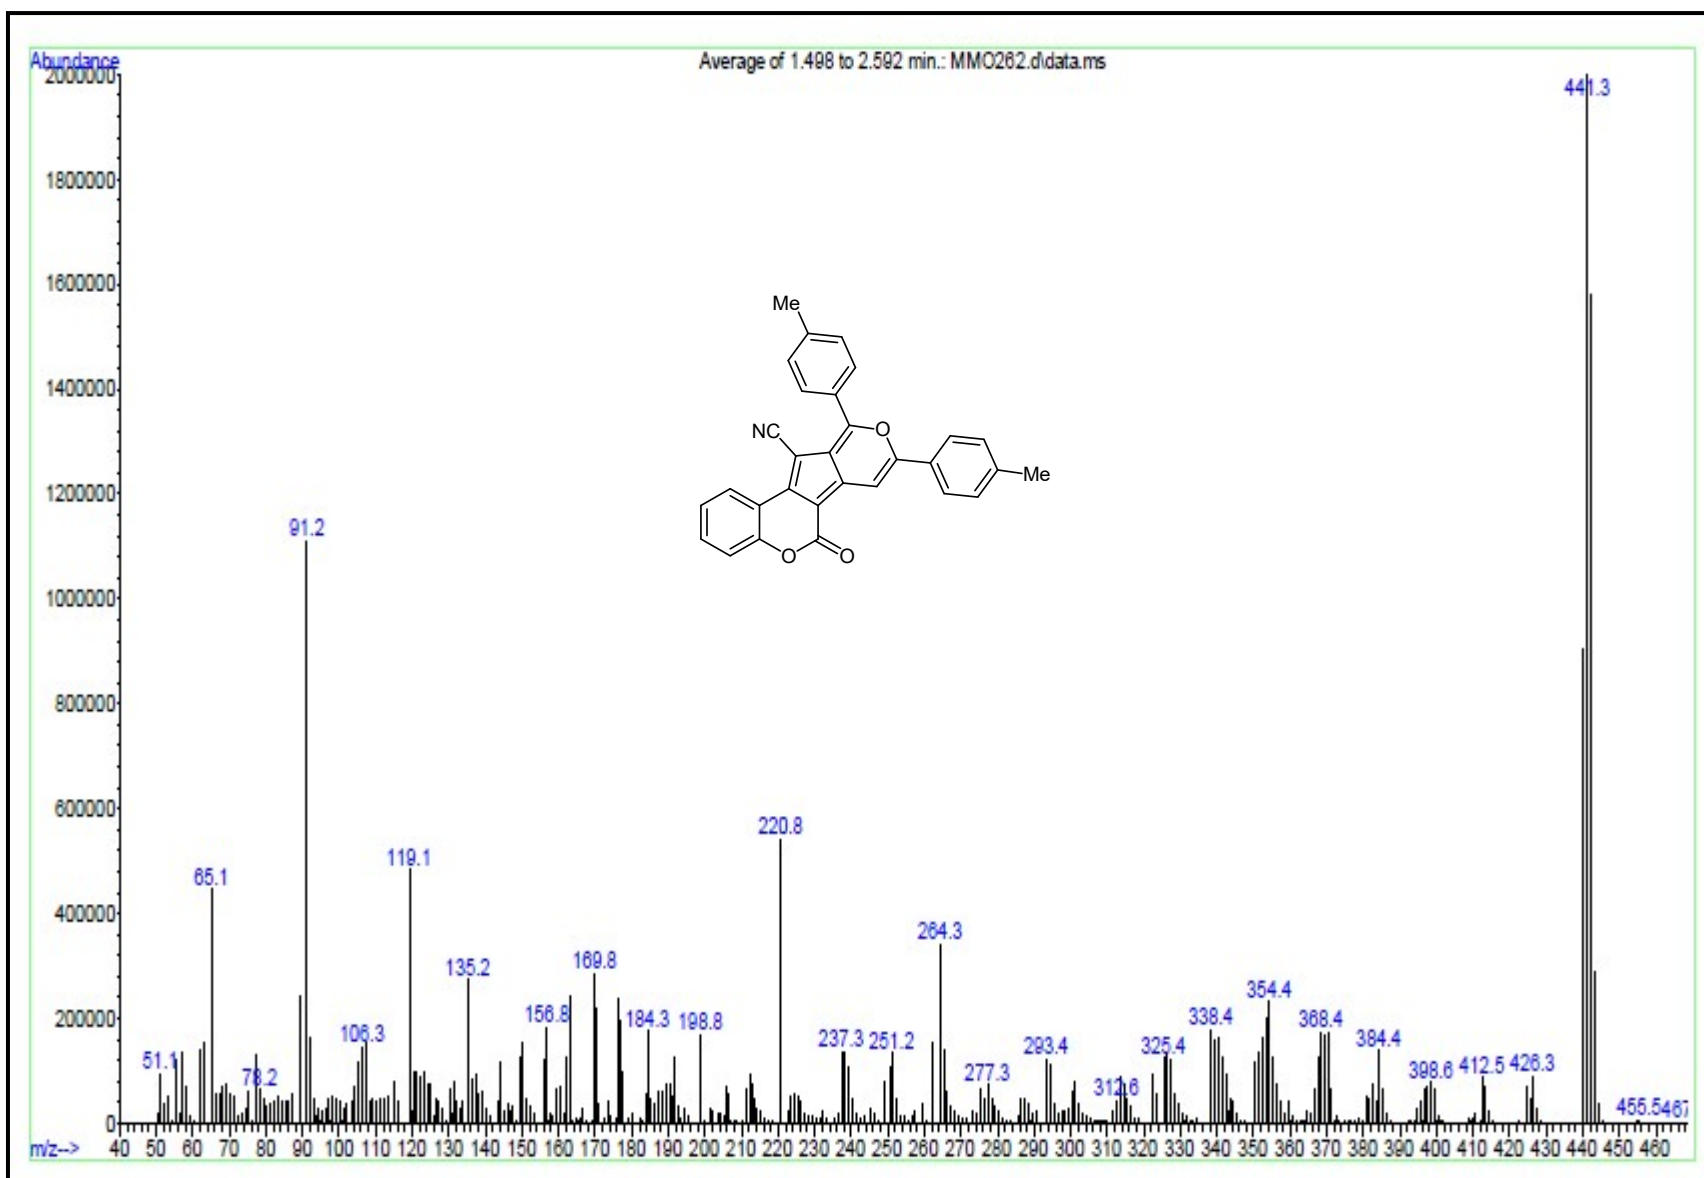

Mass spectrum of **3g**

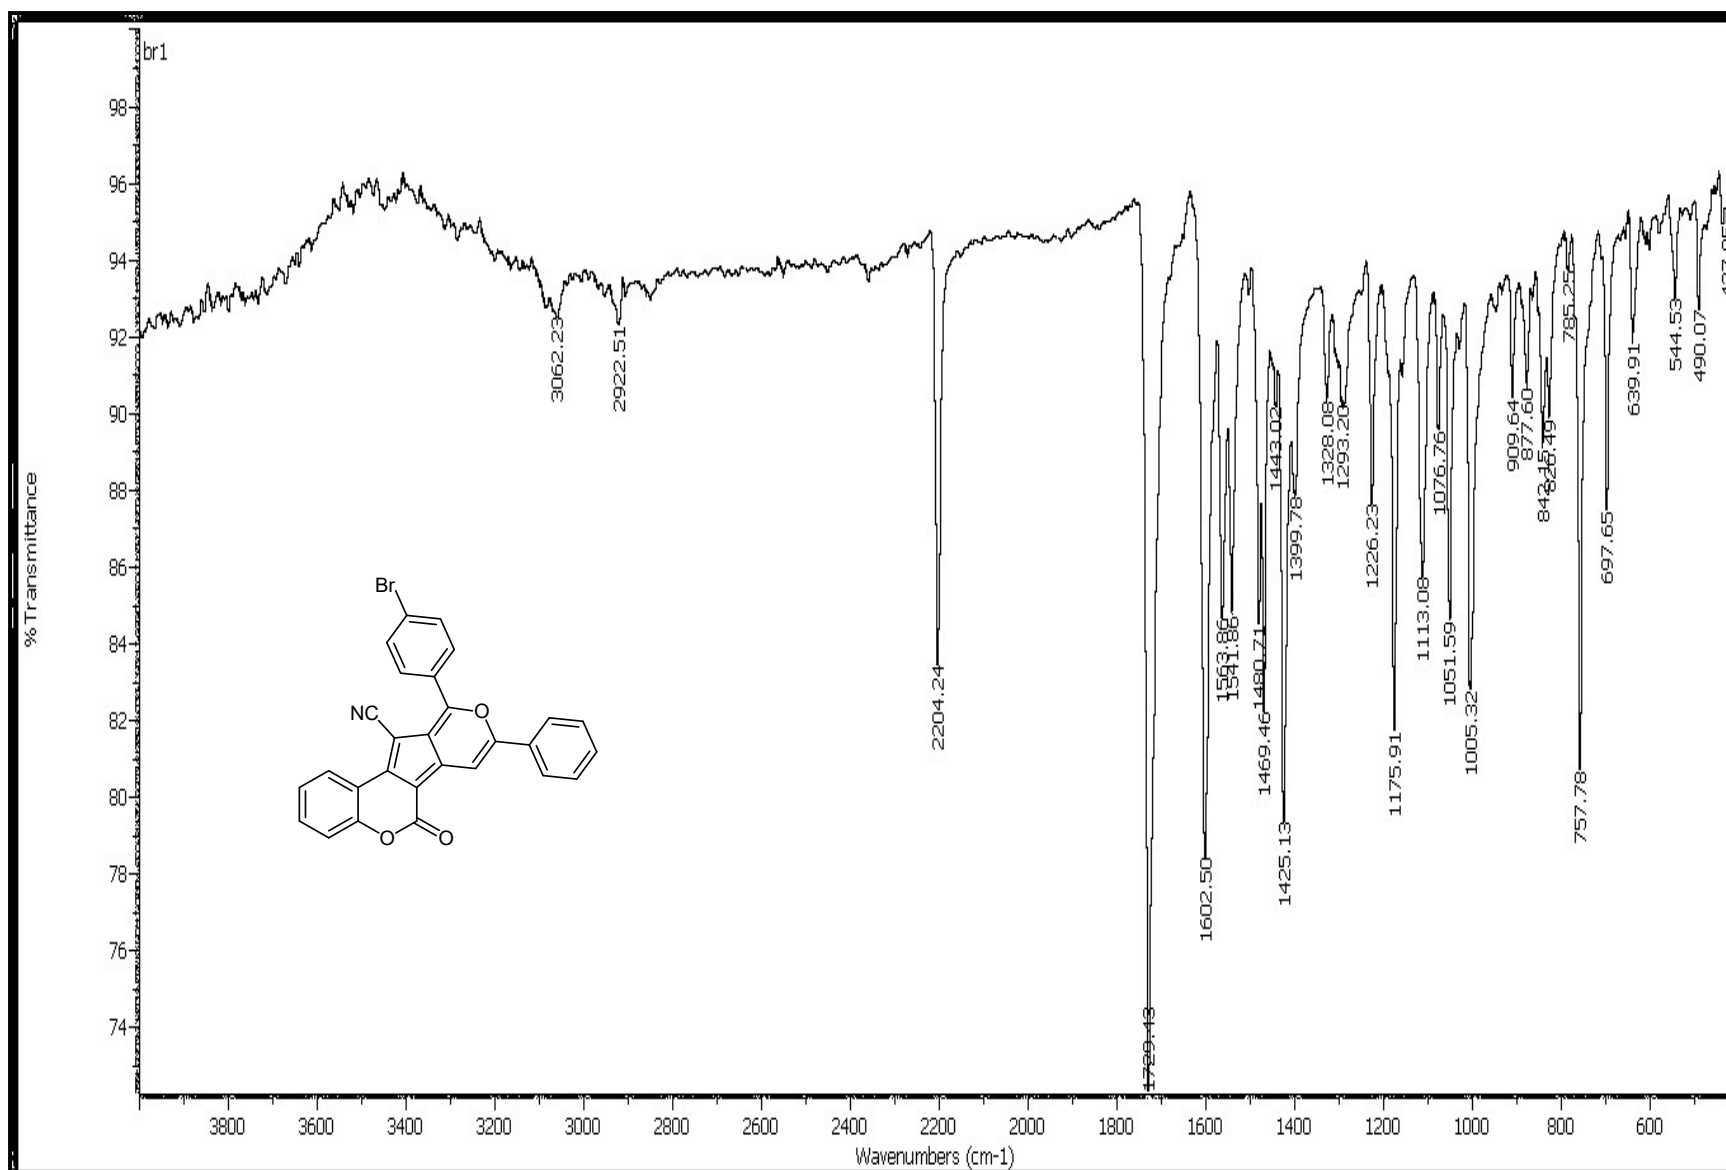

IR spectrum of 3h

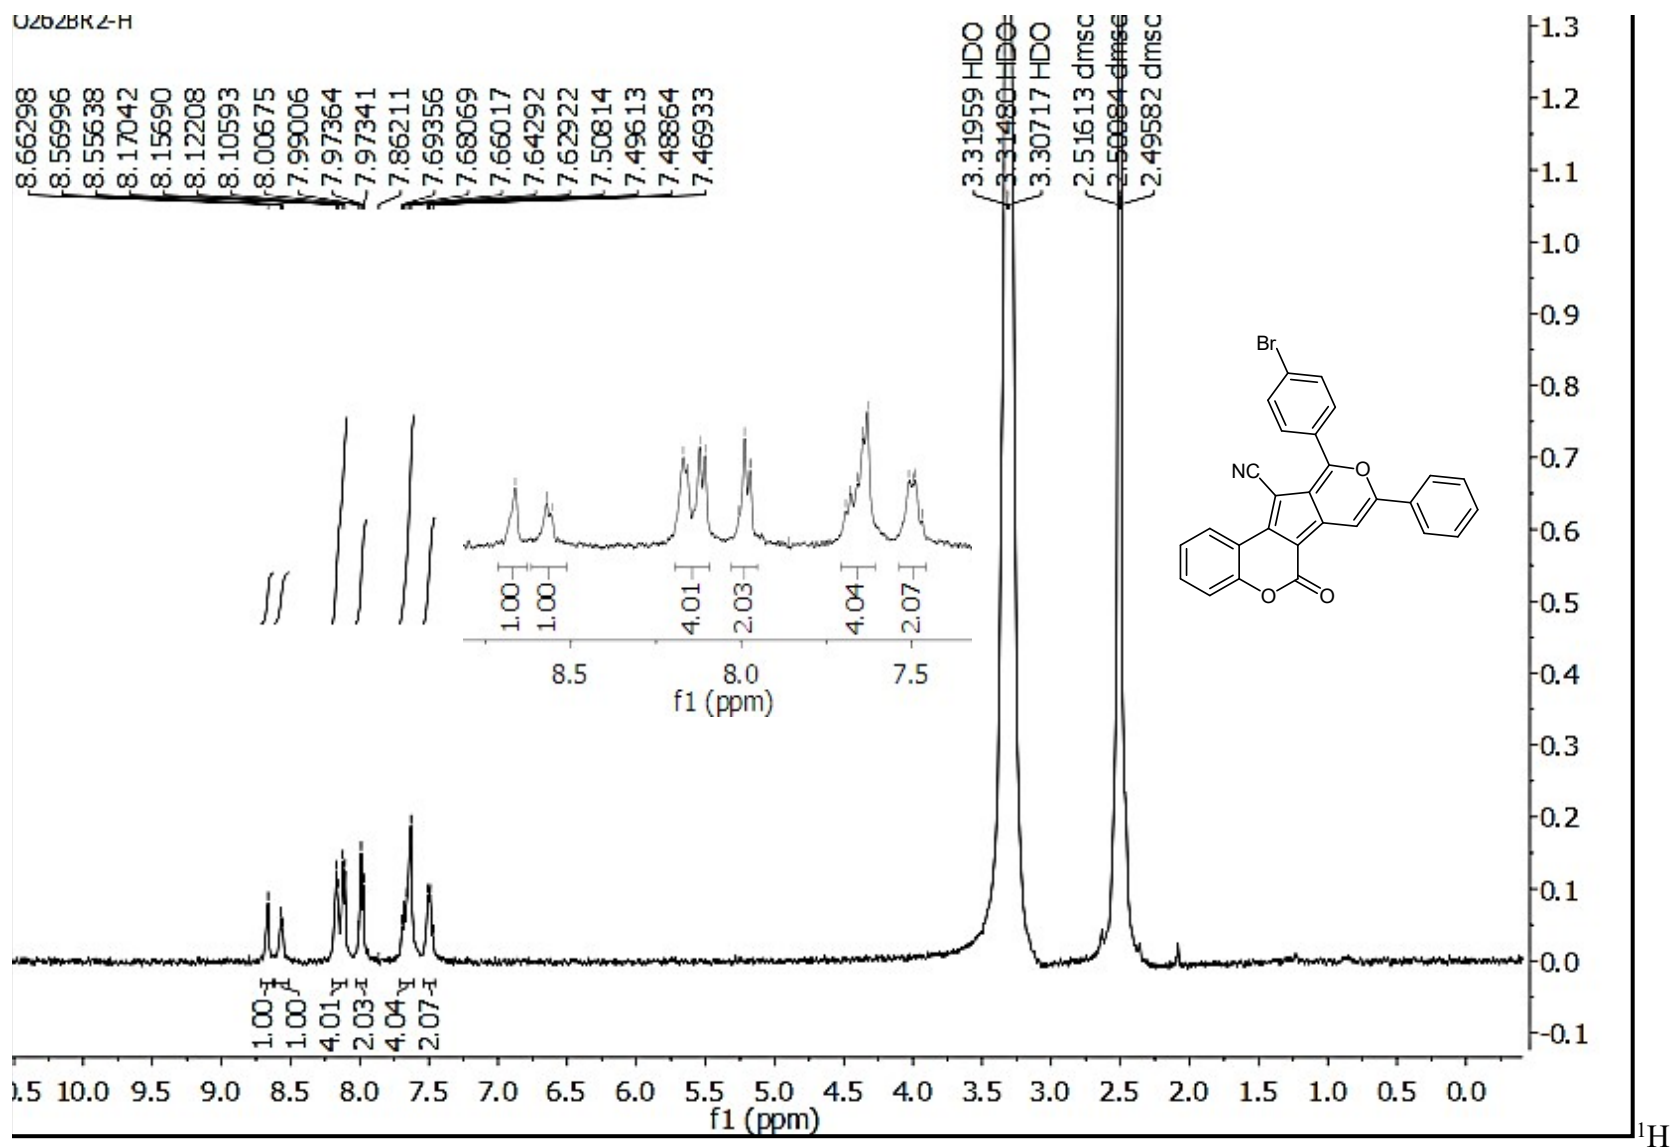

NMR (DMSO- $d_6$ , 500 MHz) of **3h**

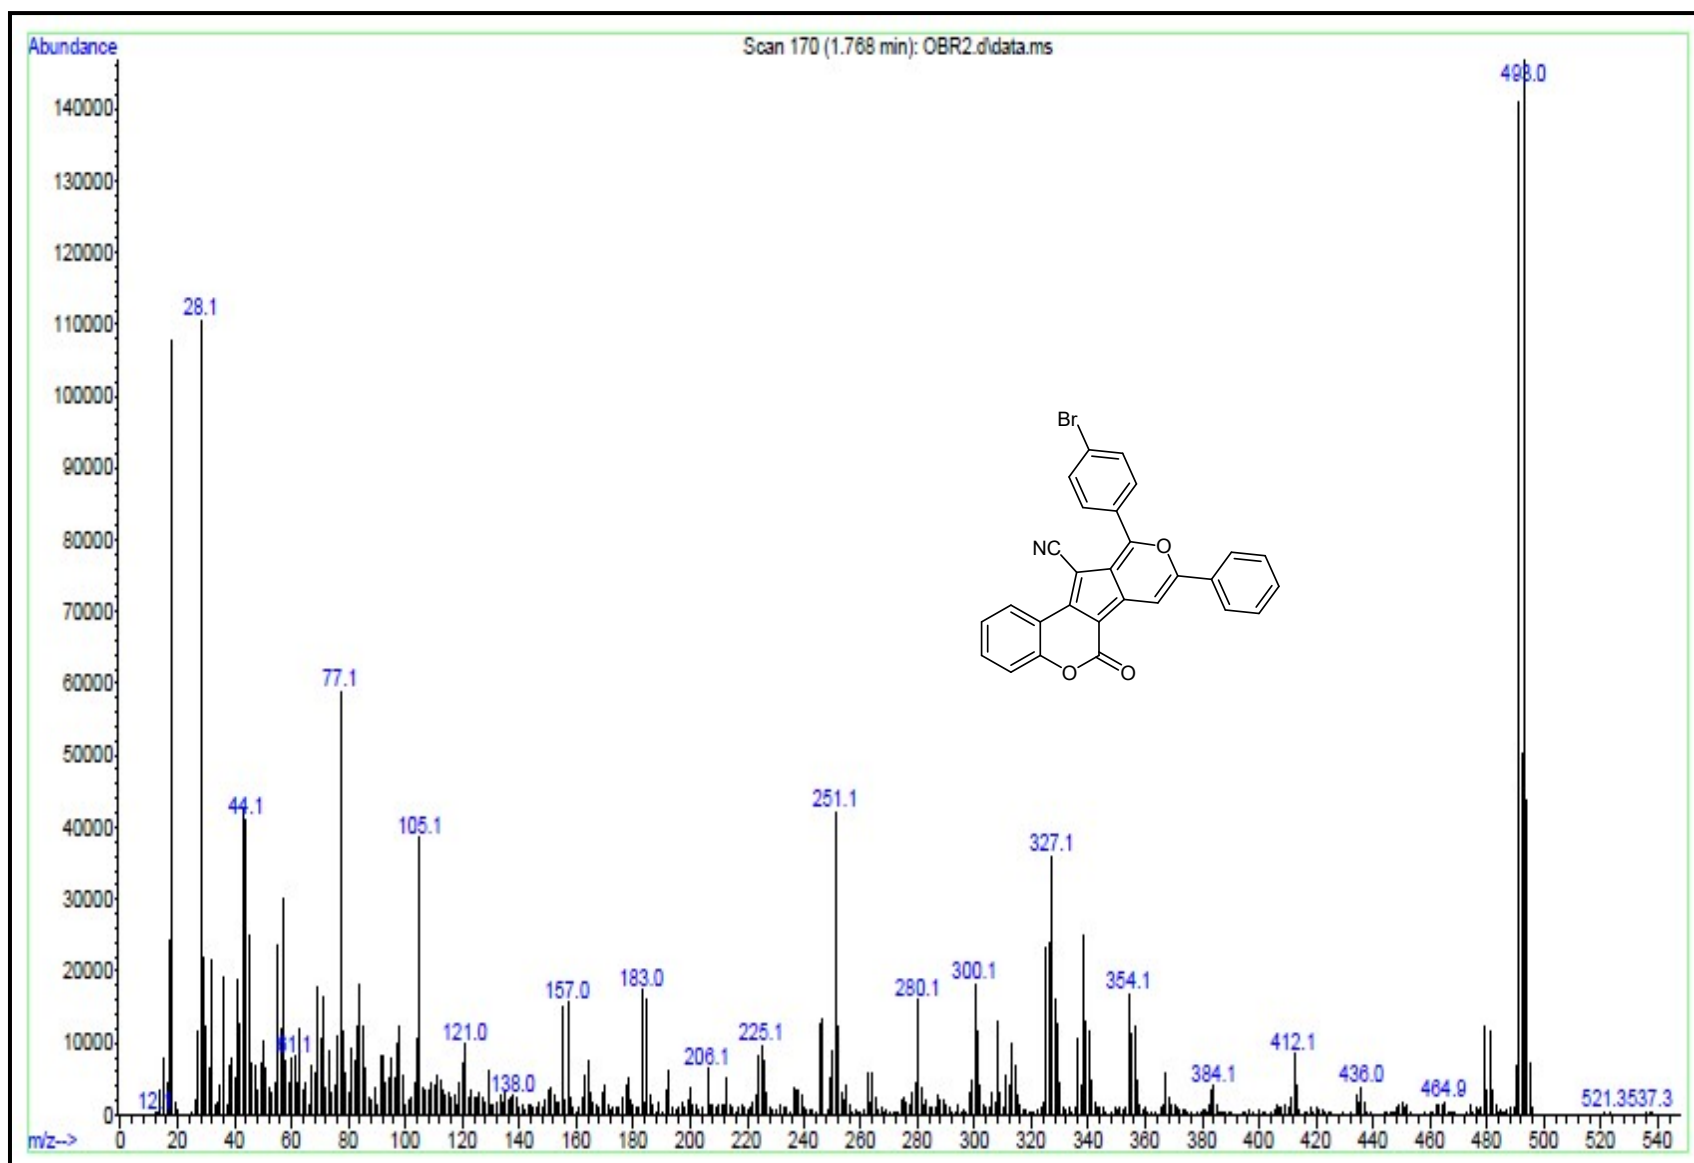

Mass spectrum of **3h**

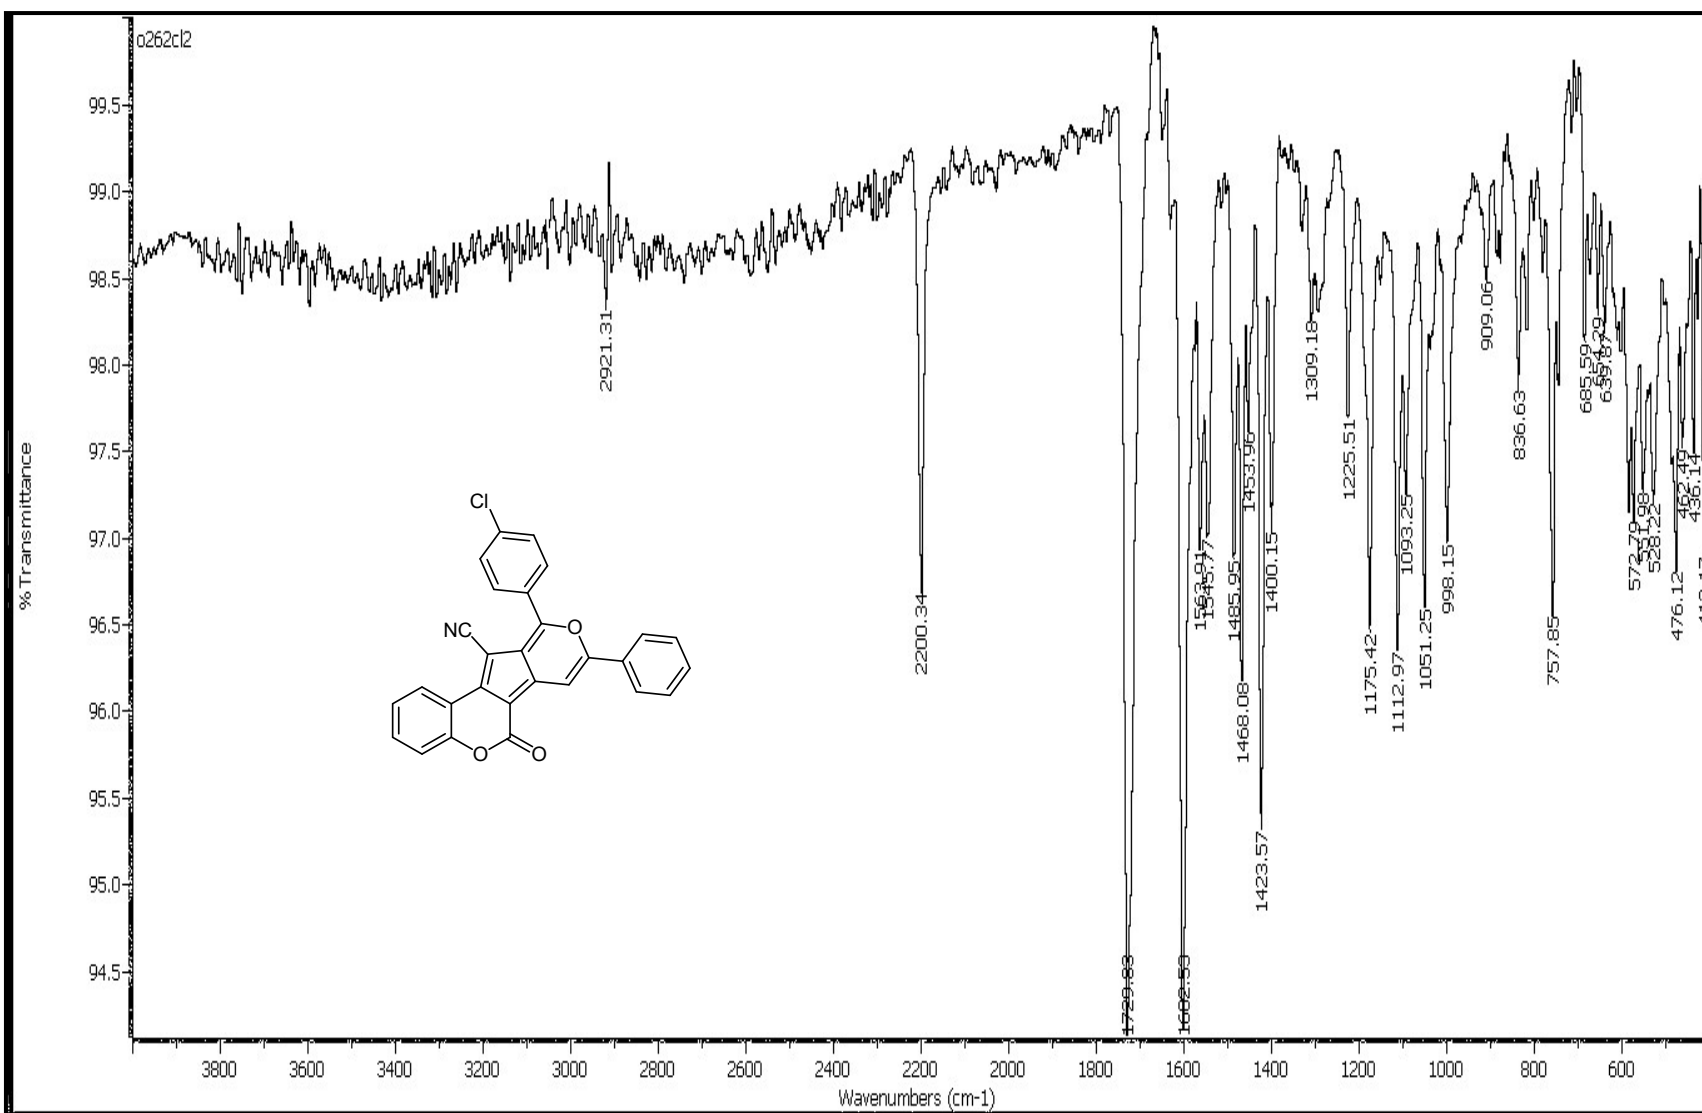

IR spectrum of **3i**

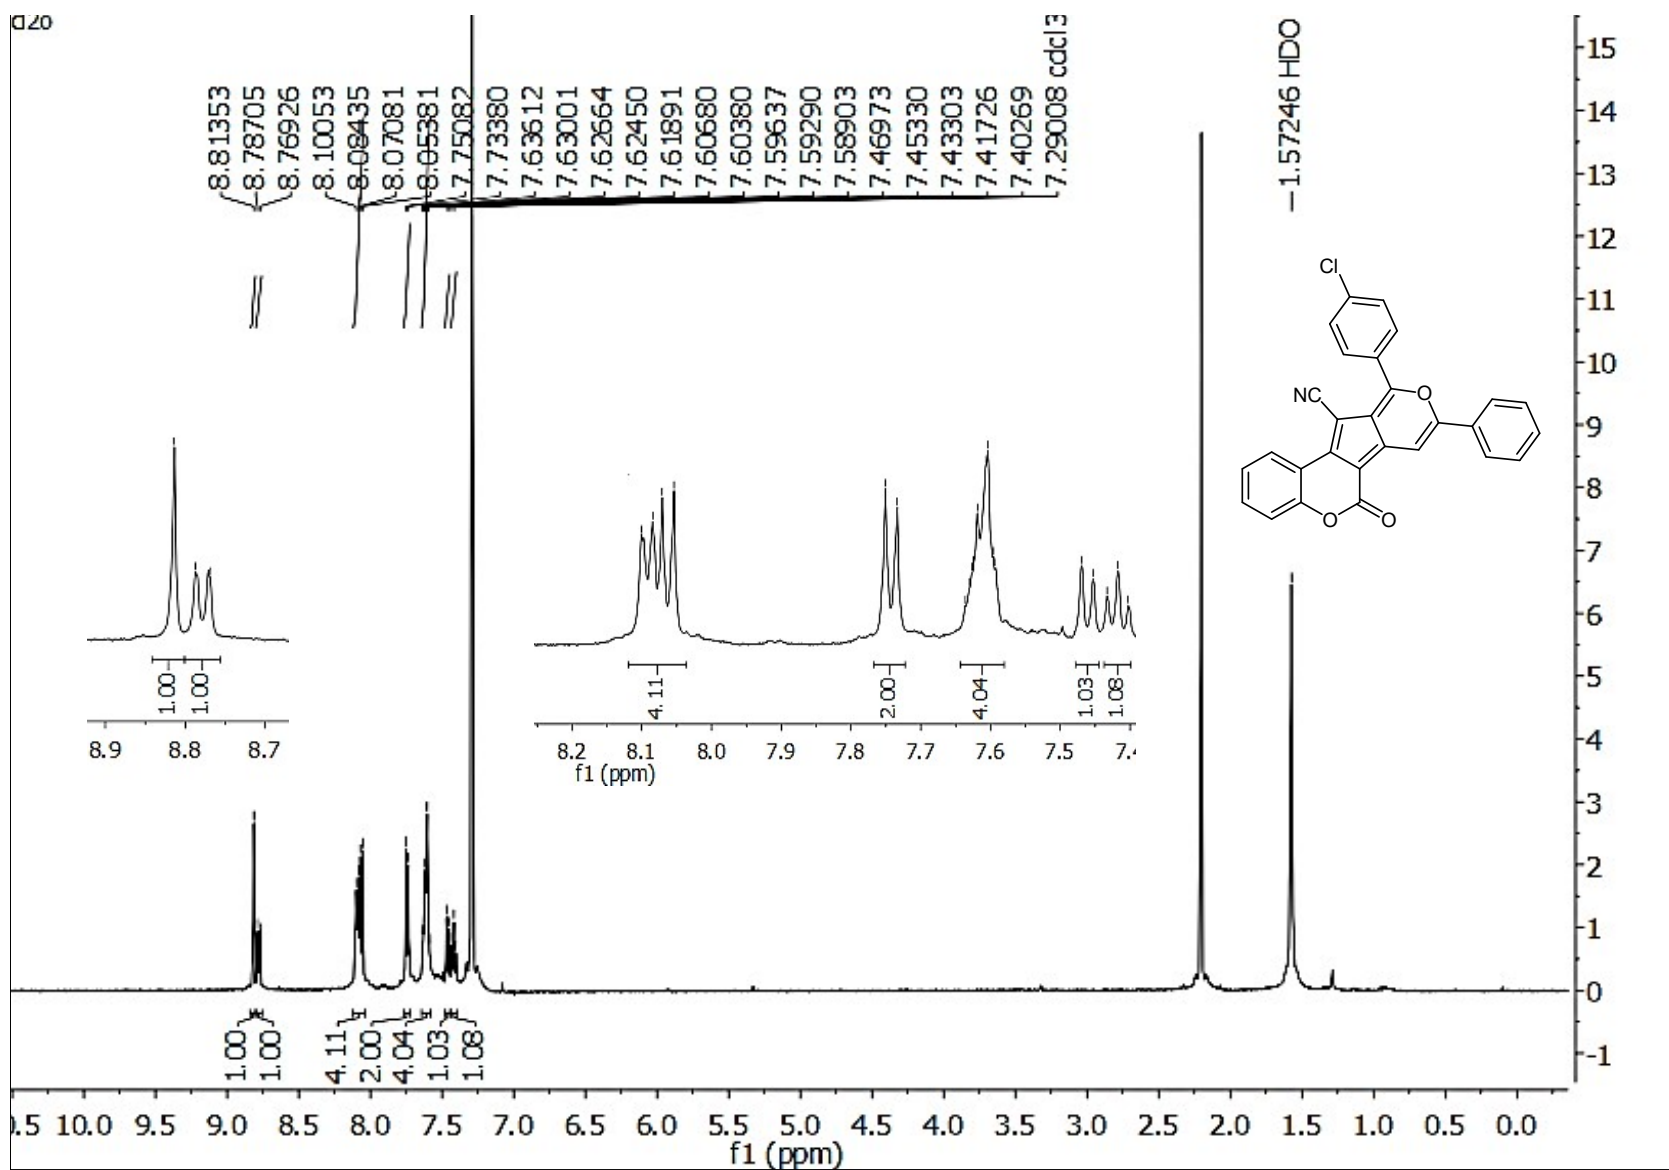

<sup>1</sup>H NMR (CDCl<sub>3</sub>, 500 MHz) of **3i**

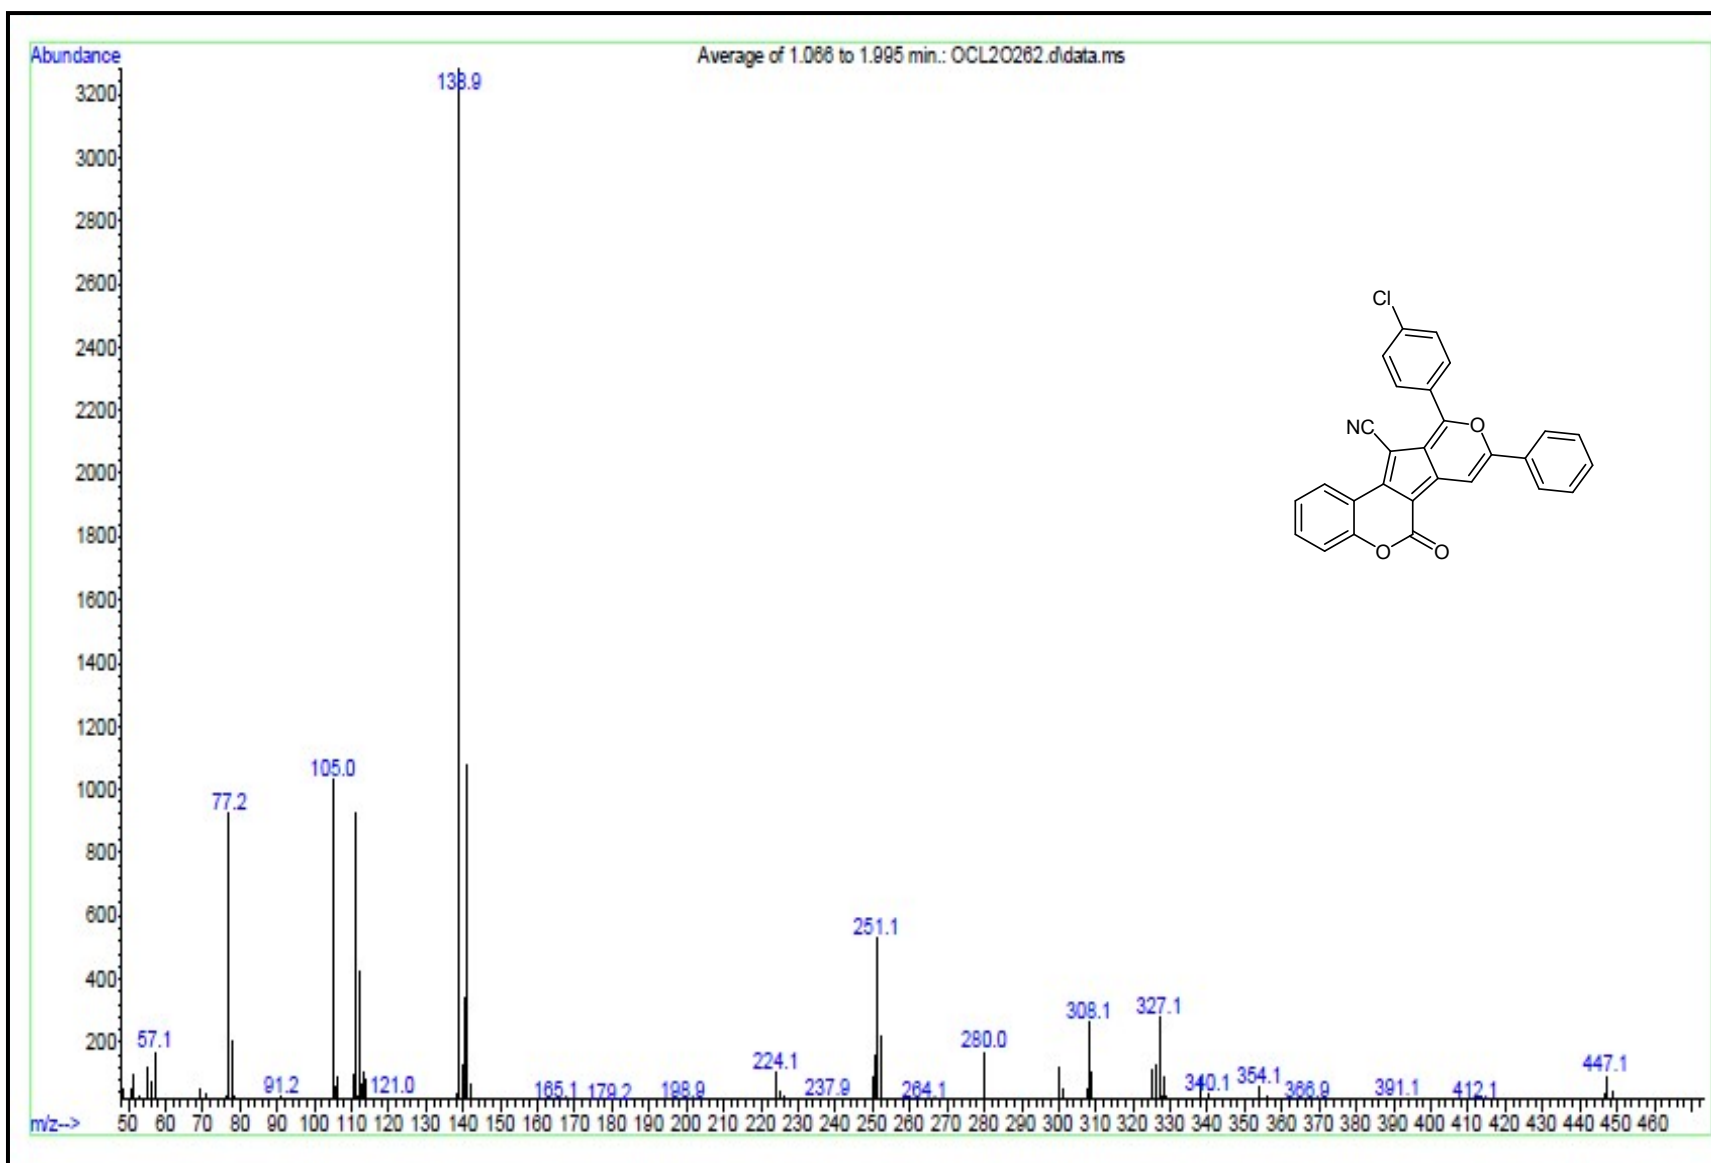

Mass spectrum of **3i**

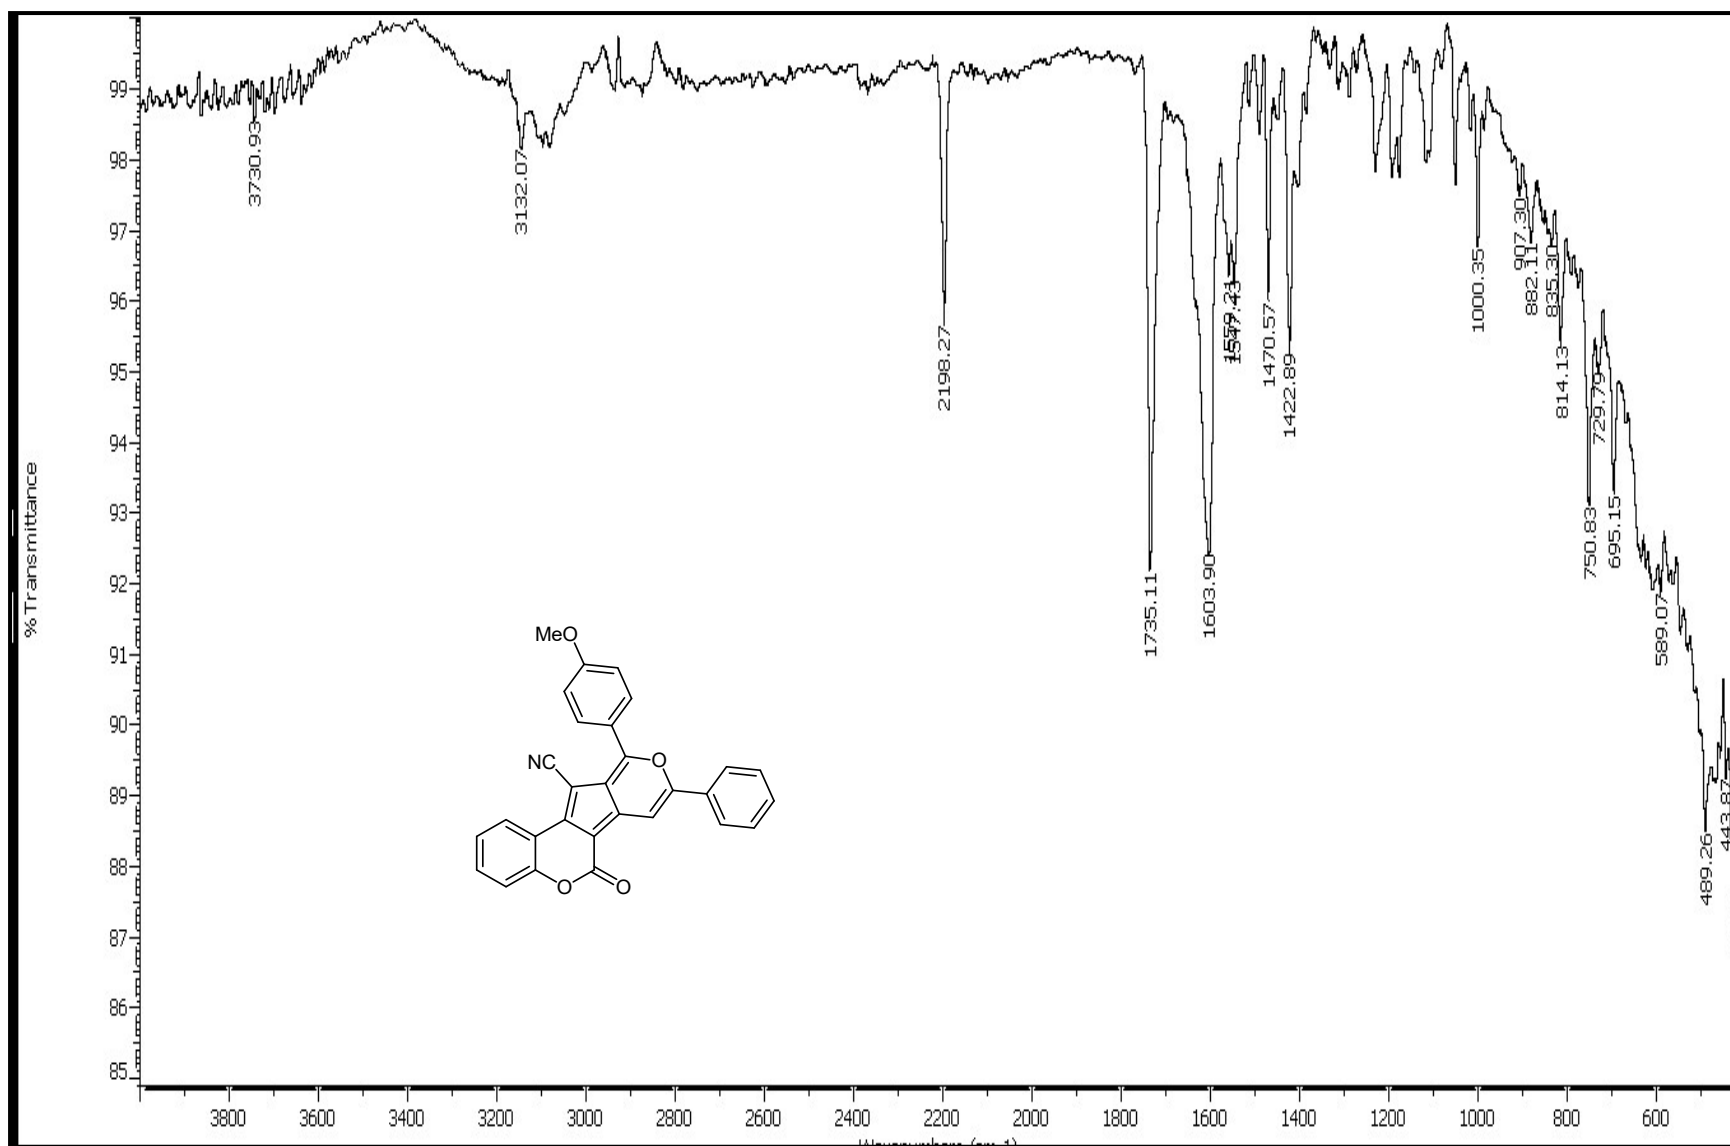

IR spectrum of **3j**



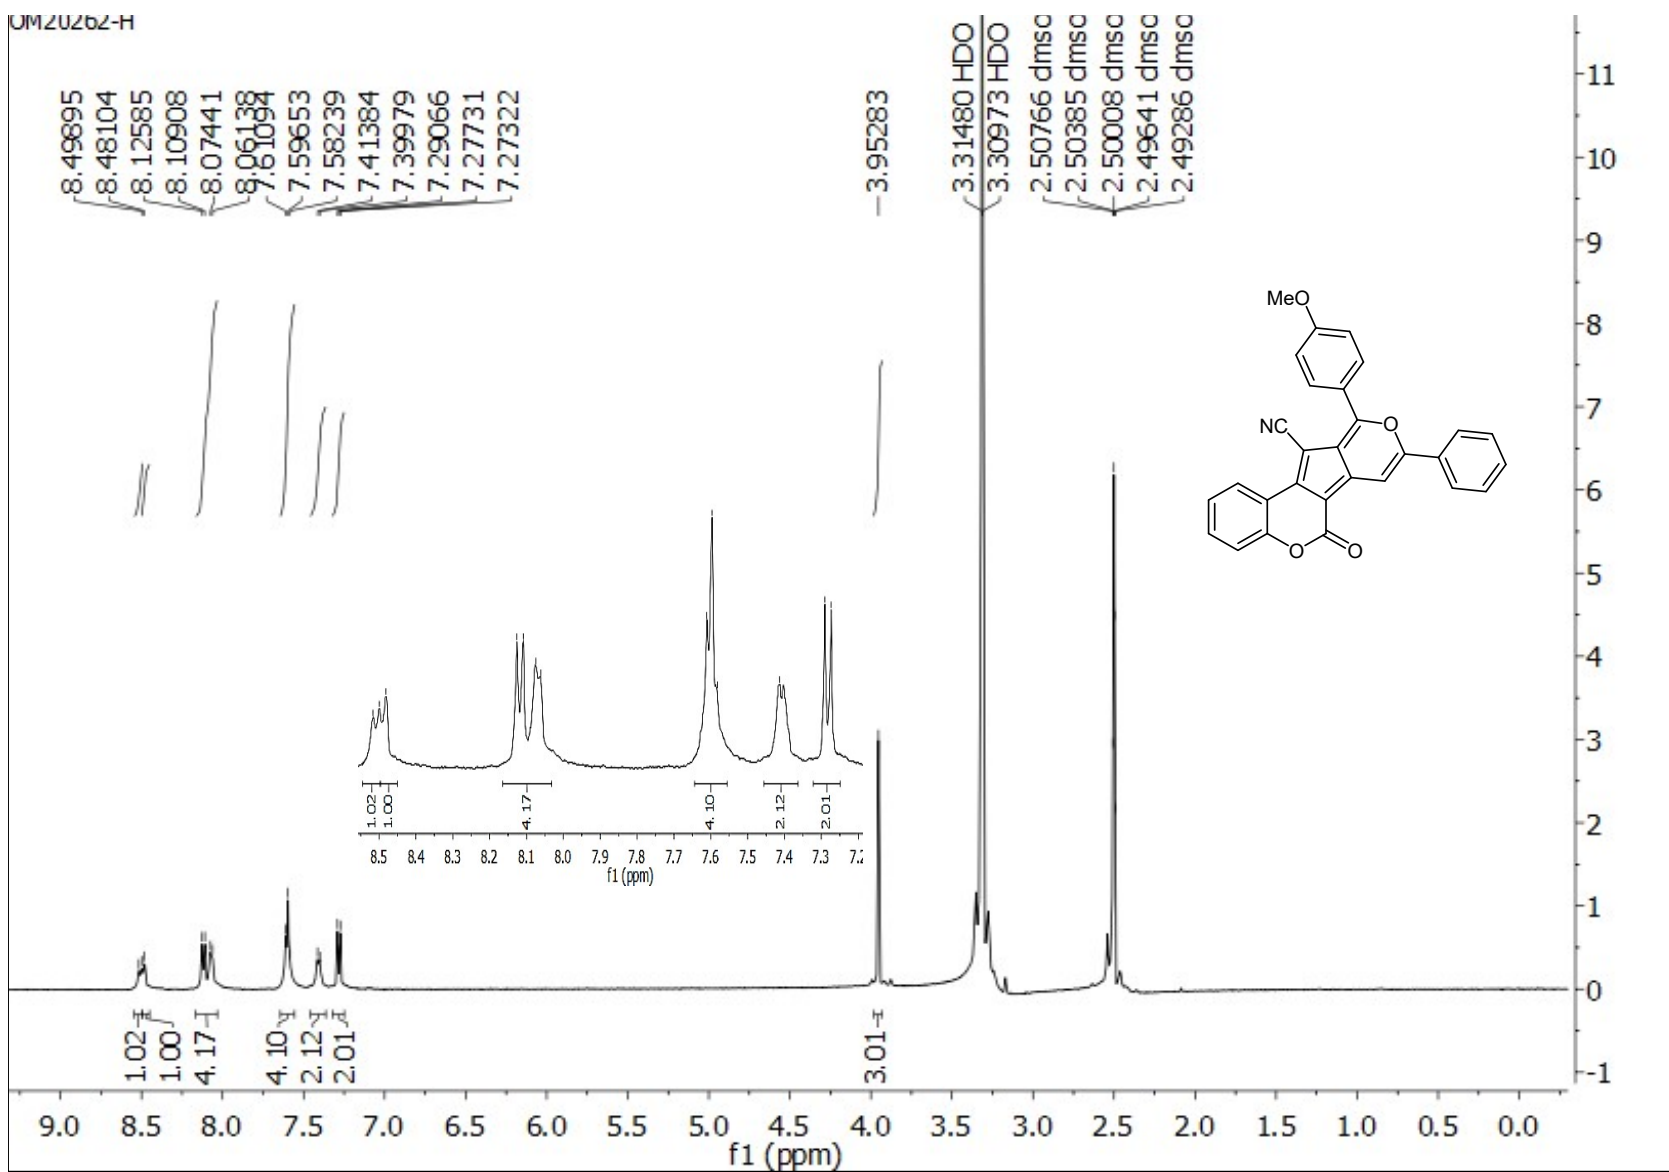

$^1\text{H}$  NMR (DMSO- $d_6$ , 500 MHz) of **3j**

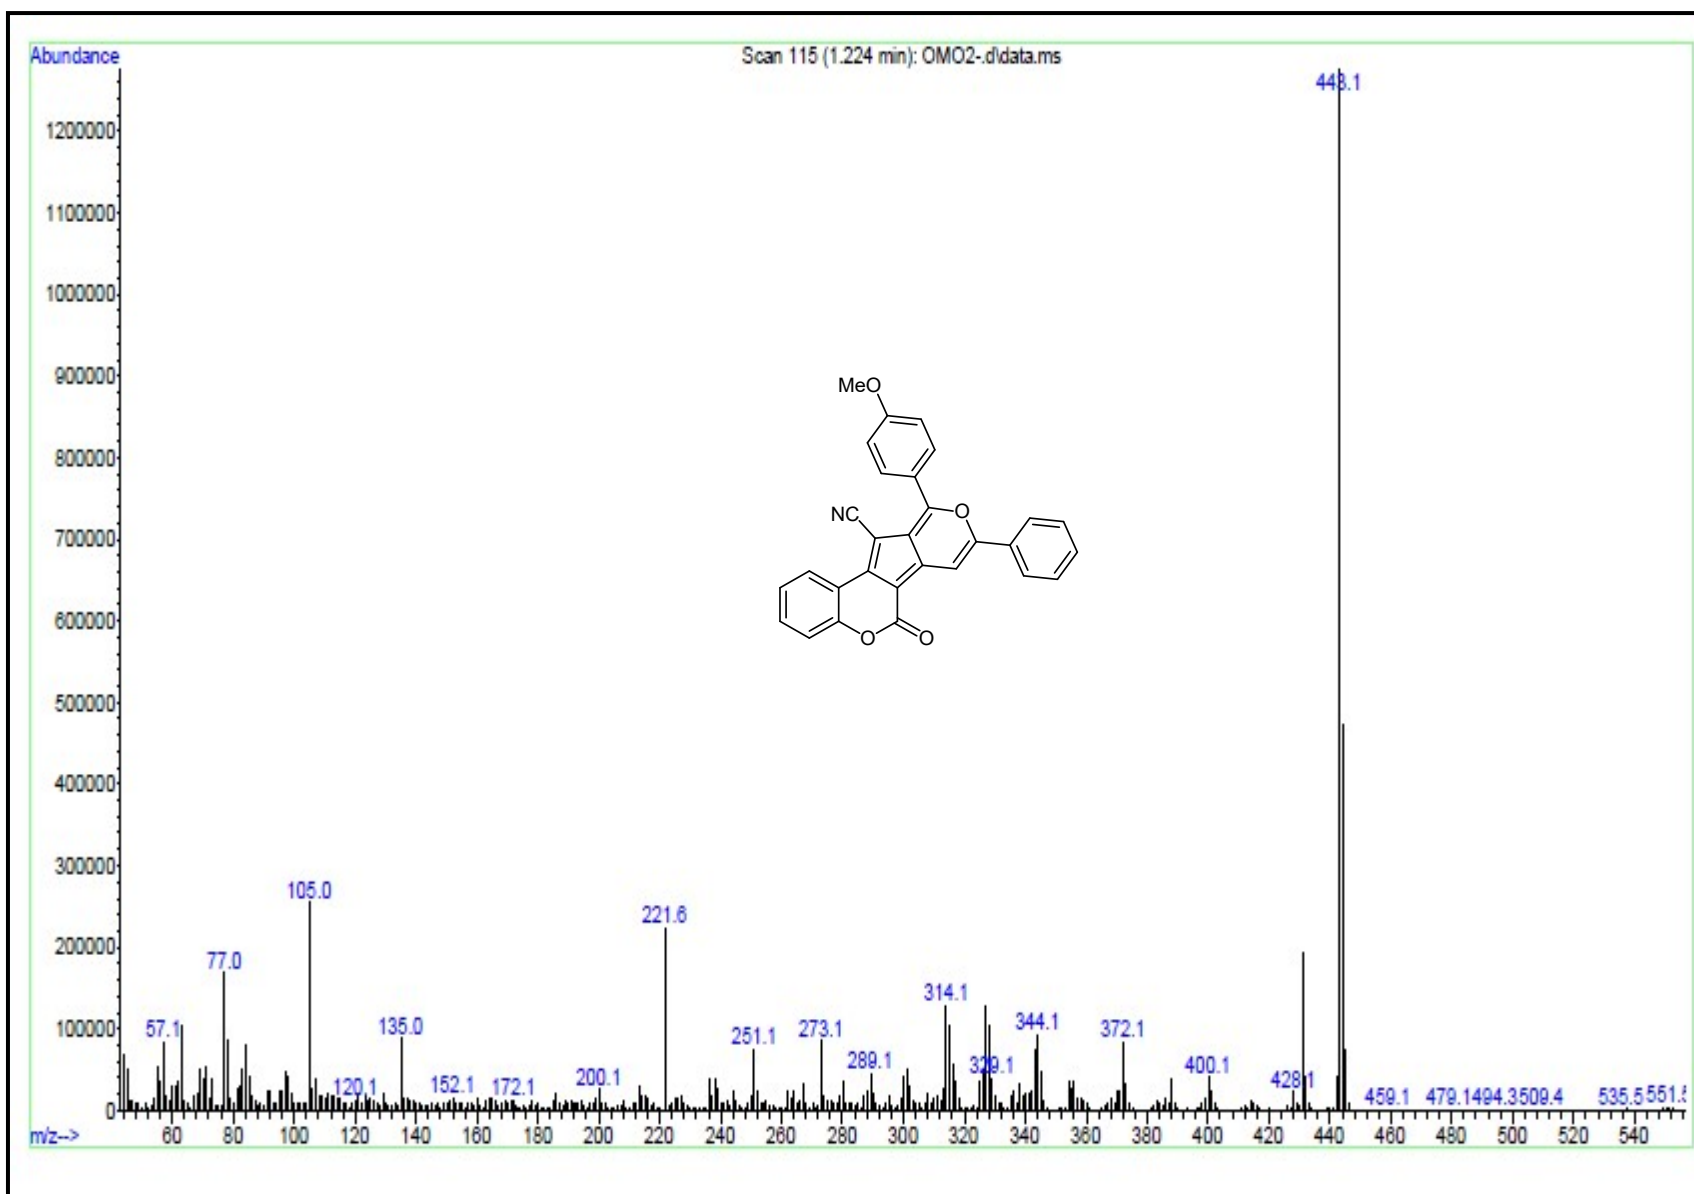

Mass spectrum of **3j**

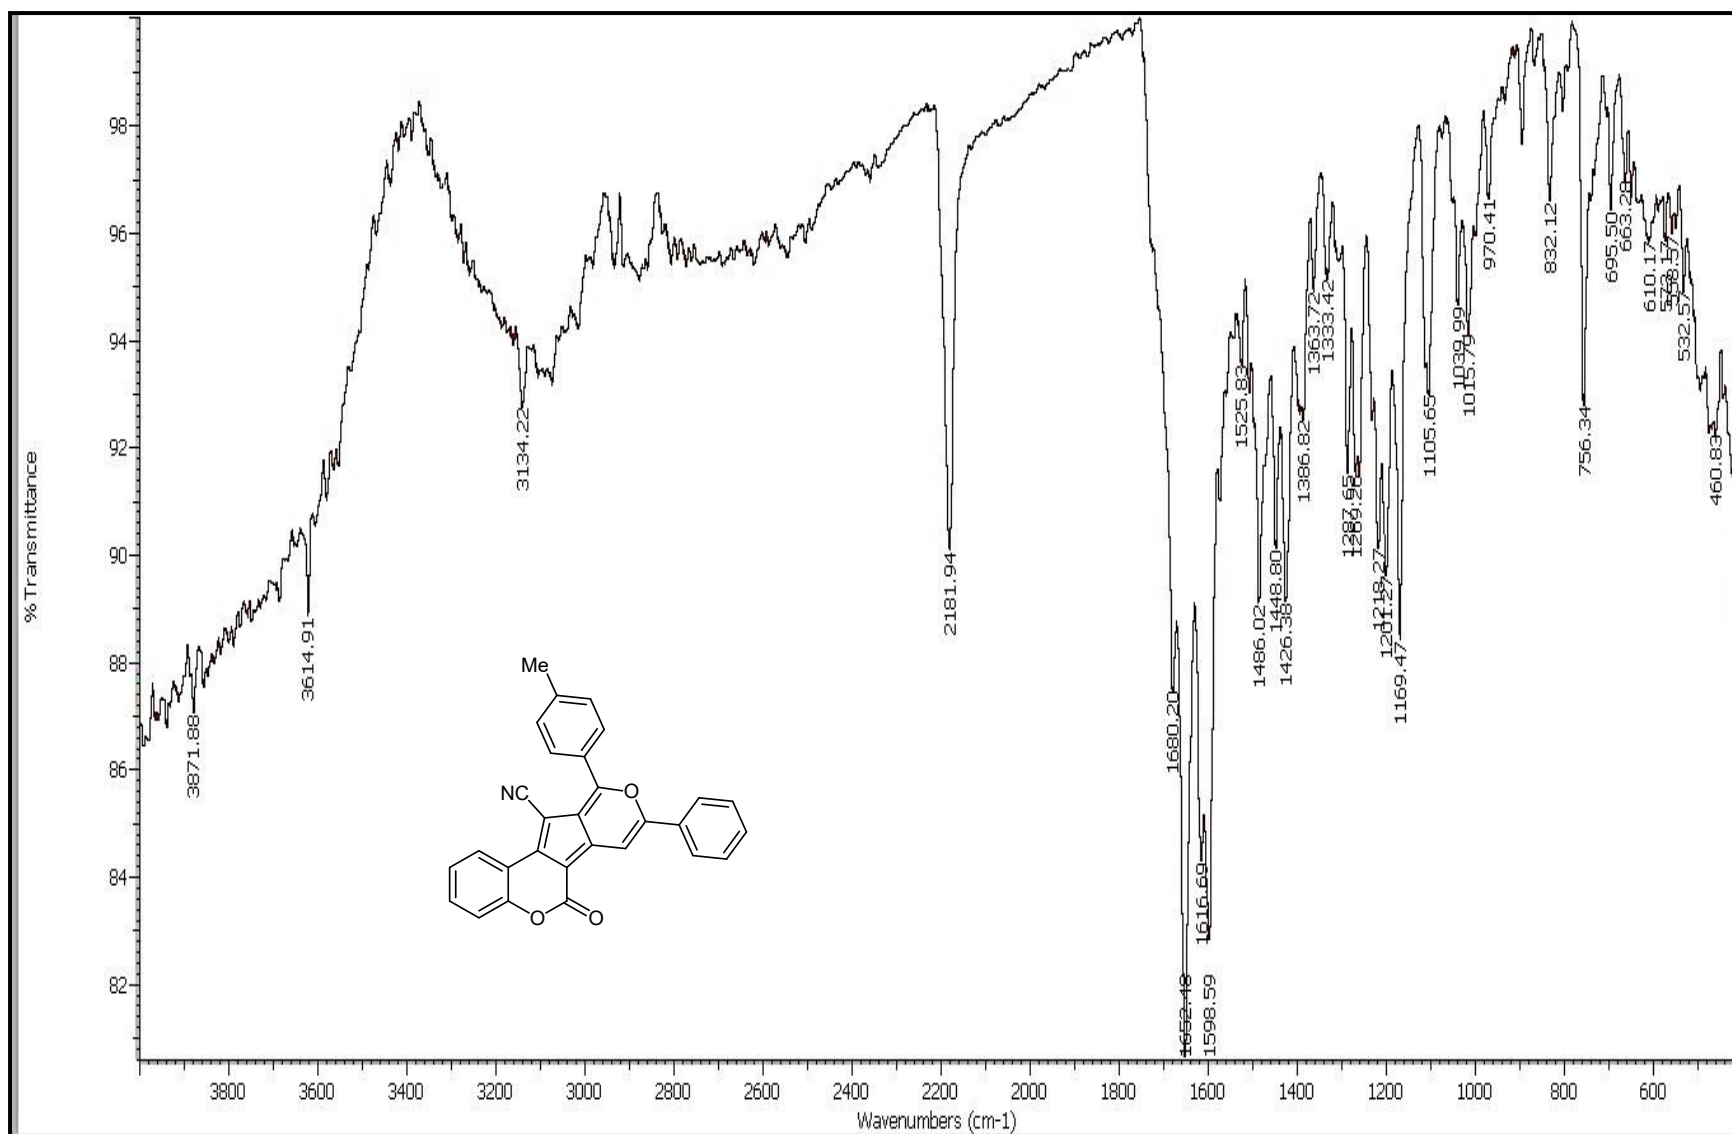

IR spectrum of 3k

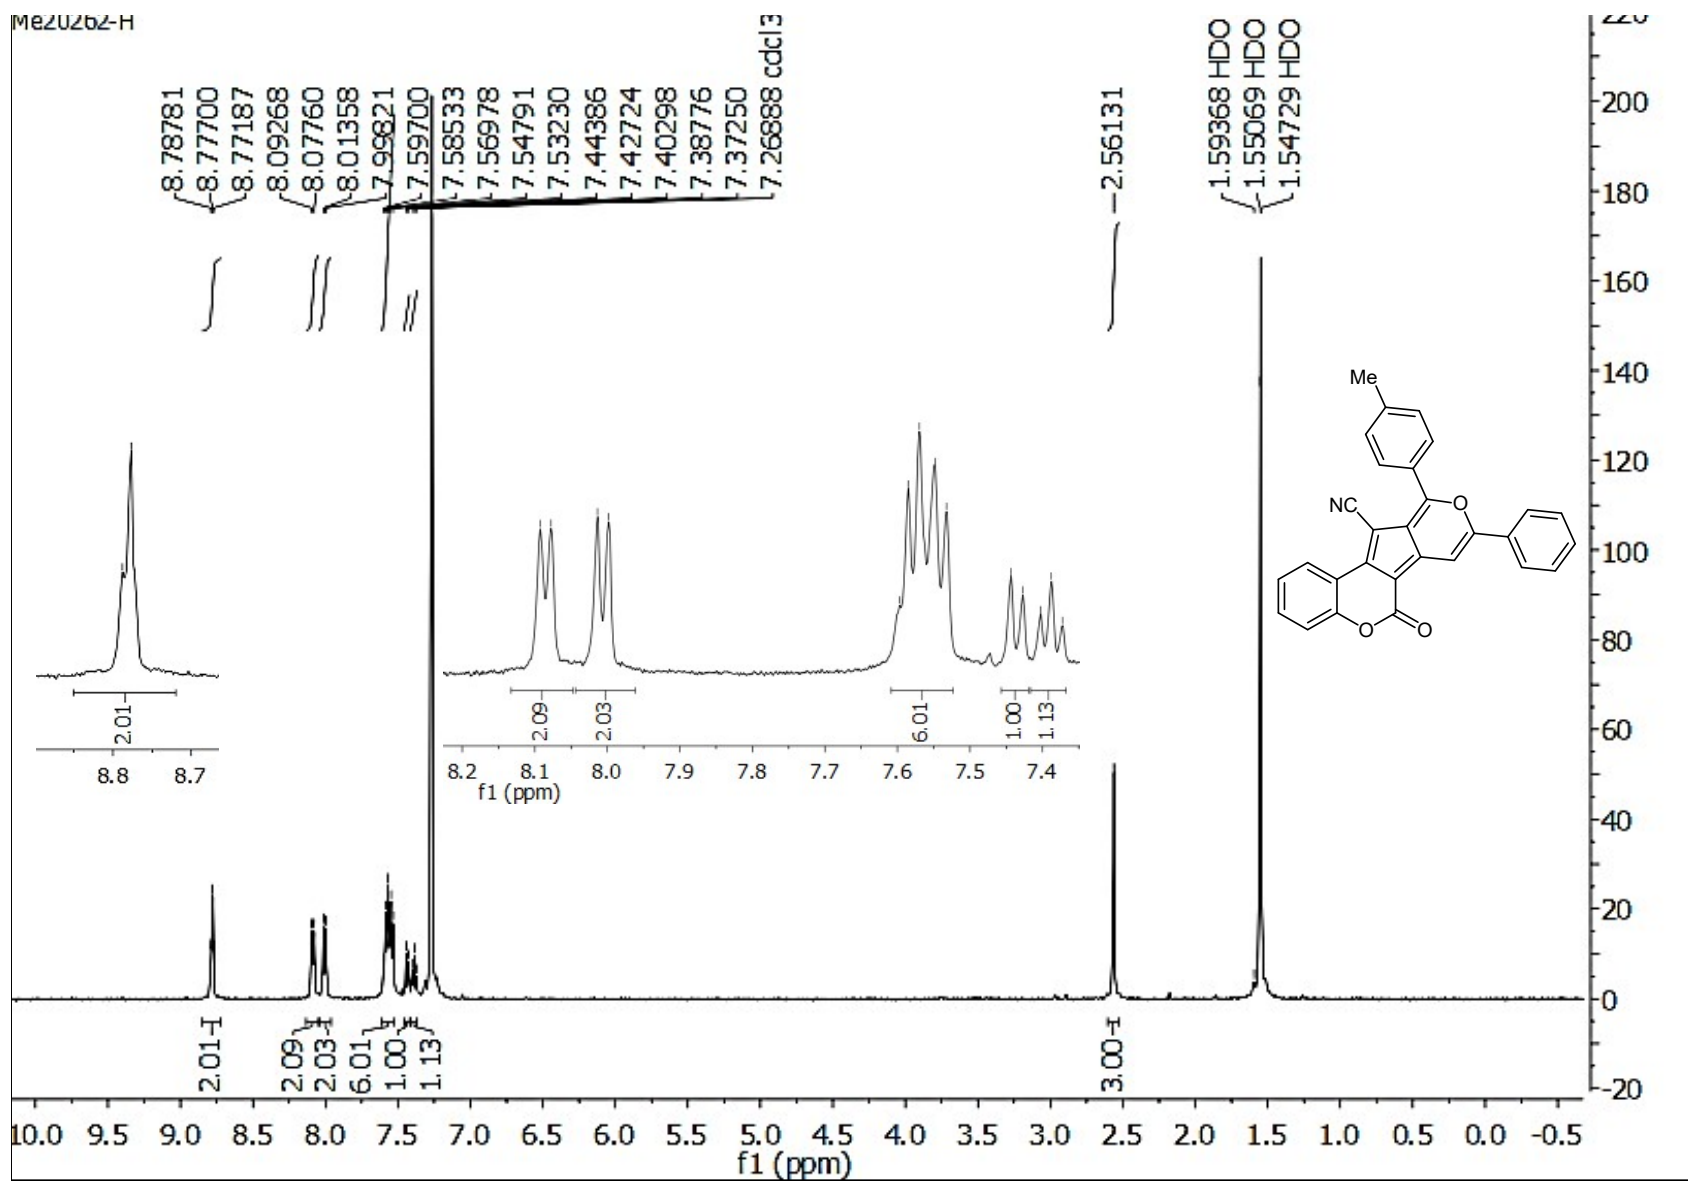

<sup>1</sup>H NMR (CDCl<sub>3</sub>, 500 MHz) of **3k**

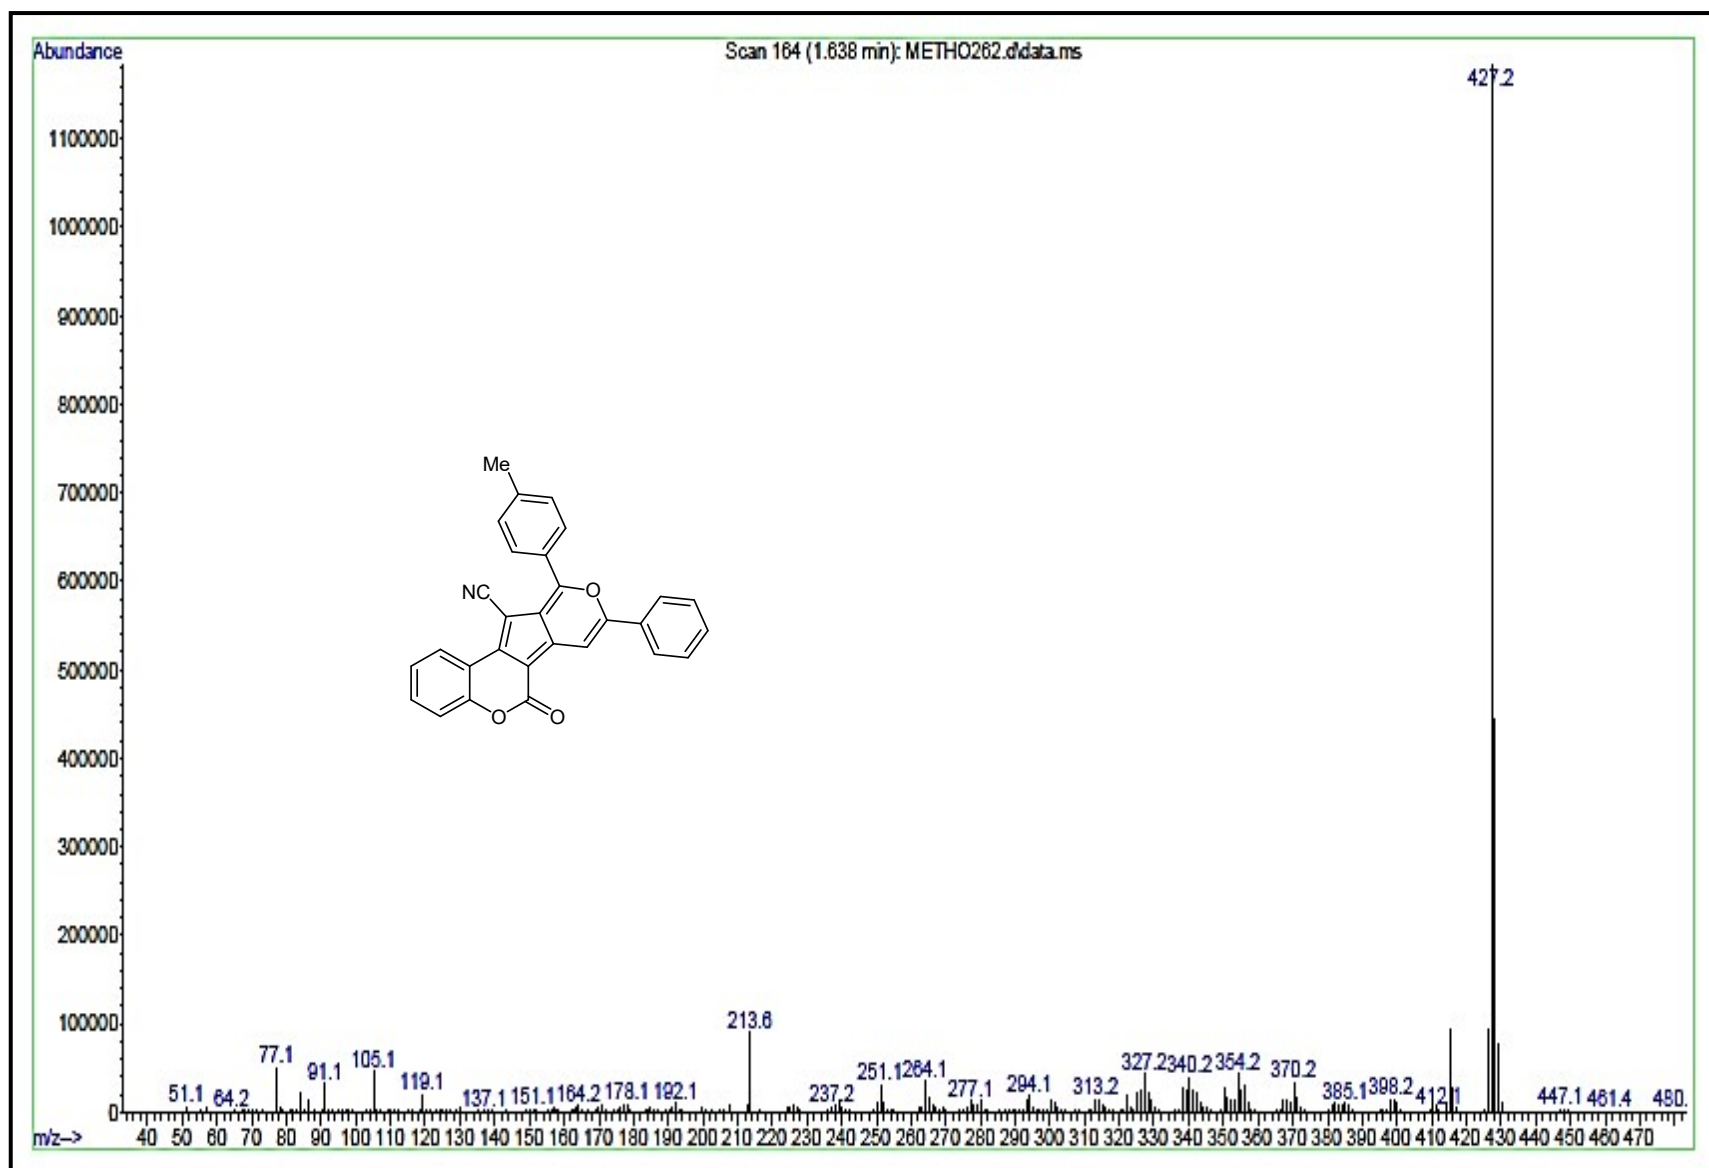

Mass spectrum of **3k**
